# Supplementary material for: Improving the chemical stability of blue heteroleptic iridium emitter FIrpic in the lowest triplet state through ancillary ligand modification: a theoretical perspective
Source: Royal Society of Chemistry journal article supplement (doi:10.1039/d2cp00185c), 2022-01-01
Supplement: d2cp00185c1.pdf [file d2cp00185c1.pdf]

Supporting Information:

# Improving the Chemical Stability of Blue Heteroleptic Iridium Emitter FLrpic in the Lowest Triplet State through Ancillary Ligand Modification: A Theoretical Perspective

*Huifang Li\**, *Luyan Huang*, *Zehua Huang*, *Lisheng Zhang*, *Yuanzheng Tang*, *Xiaojun Wang*,  
*Yan He\**, *Zhiming Liu\**

College of Electromechanical Engineering, Shandong Engineering Laboratory for Preparation  
and Application of High-performance Carbon-Materials, Qingdao University of Science &  
Technology, Qingdao, Shandong 266061, China

\*Email: [huifang0801@gmail.com](mailto:huifang0801@gmail.com); [heyang@qust.edu.cn](mailto:heyang@qust.edu.cn); [lzmwhhit@hotmail.com](mailto:lzmwhhit@hotmail.com)

## Table of contents

Discussion: Benchmark calculation results

Table S1. Geometry parameters of FIrpic obtained from a number of benchmark calculations

Figure S1. Chemical structure of FIrpic complex

Figure S2. Representations of the HOMO and LUMO of FIrpic

Figure S3. Calculated energy parameters for the degradation pathways of Ir emitters in the  $S_0$  and the  $T_1$  states obtained at the  $\omega$ B97X-D/cc-pVDZ level.

Figure S4. Contour plots of the SOMO (low) and SOMO+1 (high) energy orbitals forming three triplet states of the FIrpic

Table S2. The main distribution of the frontier MOs in in different states of FIrpic

Discussion: Final products: two ionic or radical fragments

Figure S5. Proposed dissociation pathways for picolinate radical and ion for forming  $CO_2$  product

Table S3. Calculated dissociation energies ( $E_d$ ) and energy barriers ( $E_a$ ) for picolinate particles in different medias

Figure S6. Proposed dissociation pathway for picolinate radical by losing one  $CO_2$  unit

Figure S7. Scan calculation results for the energy potential along with the C-C bond elongation between  $-COO^-$  and pyridyl parts of picolinate

Figure S8-9. Contour plots of the SOMO orbitals of Ir emitters

Figure S10-11. The nature of the orbitals involved in the  $T_1$  to  $S_0^*$  transition of Ir emitters

Figure S12. Optimized structures of Fir(pic-2-OH) and Fir(pic-2-NH<sub>2</sub>)

Figure S13. Vibration mode for Ir-N<sub>1</sub> bond stretching

Table S4-S23. Optimized Cartesian coordinates for Ir complexes in the lowest triplet states

References

## Benchmark Calculations

All calculations were performed using the Gaussian 16 C.01 package<sup>1</sup>. For the aim to find a better theoretical method for our study, geometry parameters of FIrpic complex in the ground state were optimized with four different functions, including B3LYP,<sup>2-4</sup> M06-2X,<sup>5</sup> PBE0,<sup>6</sup> and  $\omega$ B97X-D,<sup>7</sup> which were used in previous studies for the iridium complexes.<sup>8-11</sup> Three basis set systems (BS1-3) were employed for calculations here: For BS1, a double- $\zeta$  quality basis set LANL2DZ and corresponding effective core potential were used<sup>12,13</sup> for iridium; usual 6-31G(d,p) basis sets were used for carbon, nitrogen, hydrogen, oxygen and sulfur atoms. BS2 is made of a correlation-consistent polarized double- $\zeta$  basis set (cc-pVDZ)<sup>14</sup>. BS3 is made of a correlation-consistent polarized double- $\zeta$  basis set augmented by multiple diffuse functions (aug-cc-pVDZ)<sup>15</sup>. In addition, solvent effect was considered by conductor-like polarizable continuum model (CPCM)<sup>16</sup> with dichloromethane (CH<sub>2</sub>Cl<sub>2</sub>) ( $\epsilon=8.93$ ) and tetrahydrofuran (THF)<sup>18</sup> ( $\epsilon=7.4257$ ) solvents which were used for experimental studies<sup>17,18</sup> of iridium complexes. It is observed that solvent effect on the geometry parameters of FIrpic is very small.

Optimized geometry parameters of FIrpic in the ground state with different computational methods were collected in Table S1. Experimental determined crystal structures in acetonitrile/ethanol solutions were also listed for comparison. It is found that the PBE0 and  $\omega$ B97X-D functionals have outperformed the standard B3LYP functional. Moreover, there is a much better description of the Ir-X bond length with PBE0-D3(BJ)<sup>20-22</sup> compared with those from PBE0. Thereby, dispersion correction in functional plays an important role in correctly describing weak interactions.

**Table S1.** Main geometry parameters of FIrpic in the ground state ( $S_0$ ) obtained from a number of benchmark calculations. The atom numbering scheme is shown in Figure S1.

|                                                   | B3LYP<br>/BS1 | B3LYP<br>-<br>D3(BJ)<br>/BS1 | B3LYP<br>-<br>D3(BJ)<br>/BS2 | M062X<br>/BS1 | M062X<br>/BS2 | PBE0<br>-<br>D3(BJ)<br>/BS1 | PBE0<br>-<br>D3(BJ)<br>/BS2 | PBE0<br>-<br>D3(BJ)<br>/BS3 | $\omega$ B97X<br>-D<br>/BS1 | $\omega$ B97X<br>-D<br>/BS2 | $\omega$ B97X<br>-D<br>/BS2 <sup>a</sup> | $\omega$ B97X<br>-D<br>/BS2 <sup>b</sup> | Exptl. <sup>c</sup> |
|---------------------------------------------------|---------------|------------------------------|------------------------------|---------------|---------------|-----------------------------|-----------------------------|-----------------------------|-----------------------------|-----------------------------|------------------------------------------|------------------------------------------|---------------------|
| Ir-N <sub>1</sub>                                 | 2.206         | 2.177                        | 2.156                        | 2.213         | 2.212         | 2.149                       | 2.137                       | 2.134                       | 2.175                       | 2.162                       | 2.160                                    | 2.161                                    | 2.138(4)            |
| Ir-O <sub>1</sub>                                 | 2.180         | 2.174                        | 2.152                        | 2.197         | 2.178         | 2.155                       | 2.132                       | 2.132                       | 2.170                       | 2.153                       | 2.166                                    | 2.165                                    | 2.152(3)            |
| Ir-N <sub>2</sub>                                 | 2.073         | 2.059                        | 2.053                        | 2.067         | 2.060         | 2.040                       | 2.036                       | 2.035                       | 2.060                       | 2.055                       | 2.048                                    | 2.048                                    | 2.041(4)            |
| Ir-C <sub>2</sub>                                 | 2.014         | 2.004                        | 2.006                        | 1.986         | 1.976         | 1.992                       | 1.992                       | 1.992                       | 2.002                       | 2.000                       | 1.990                                    | 1.990                                    | 1.997(5)            |
| Ir-N <sub>3</sub>                                 | 2.061         | 2.048                        | 2.043                        | 2.054         | 2.046         | 2.030                       | 2.025                       | 2.024                       | 2.025                       | 2.042                       | 2.058                                    | 2.058                                    | 2.045(4)            |
| Ir-C <sub>3</sub>                                 | 2.011         | 1.997                        | 1.996                        | 1.980         | 1.968         | 1.994                       | 1.992                       | 1.981                       | 1.992                       | 1.990                       | 2.001                                    | 2.001                                    | 1.993(4)            |
| $\alpha$ (O <sub>1</sub> -Ir-<br>N <sub>1</sub> ) | 76.31         | 76.90                        | 77.32                        | 75.72         | 75.88         | 77.24                       | 77.46                       | 77.56                       | 77.46                       | 77.07                       | 76.72                                    | 76.73                                    | 77.38(14)           |
| $\alpha$ (C <sub>2</sub> -Ir-<br>N <sub>2</sub> ) | 80.22         | 80.56                        | 80.58                        | 80.63         | 80.87         | 80.68                       | 80.01                       | 80.74                       | 80.74                       | 80.50                       | 80.72                                    | 80.72                                    | 81.53(19)           |
| $\alpha$ (C <sub>3</sub> -Ir-<br>N <sub>3</sub> ) | 80.46         | 80.95                        | 80.85                        | 80.99         | 81.19         | 80.99                       | 80.74                       | 81.03                       | 80.01                       | 80.78                       | 80.51                                    | 80.51                                    | 80.69(18)           |

<sup>a</sup> from Ref. 17; <sup>b</sup> from Ref. 18; <sup>c</sup> from Ref. 19.

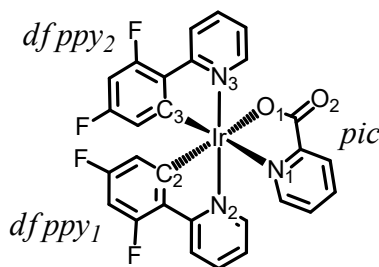

**Figure S1.** Chemical structure of FIrpic complex.

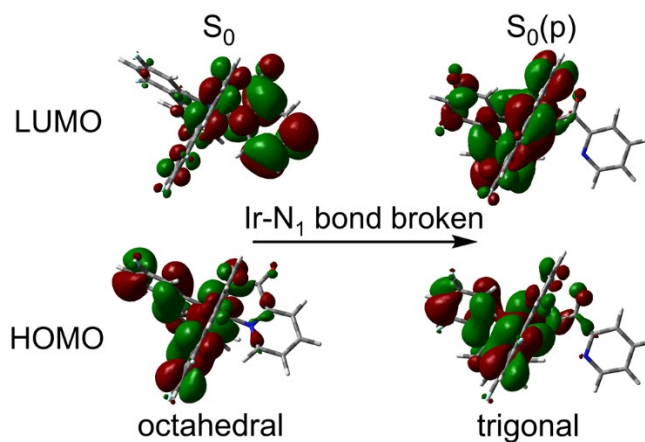

**Figure S2.** Representations of the HOMO and LUMO of FIrpic as determined at the  $\omega$ B97X/cc-pVDZ level of theory.

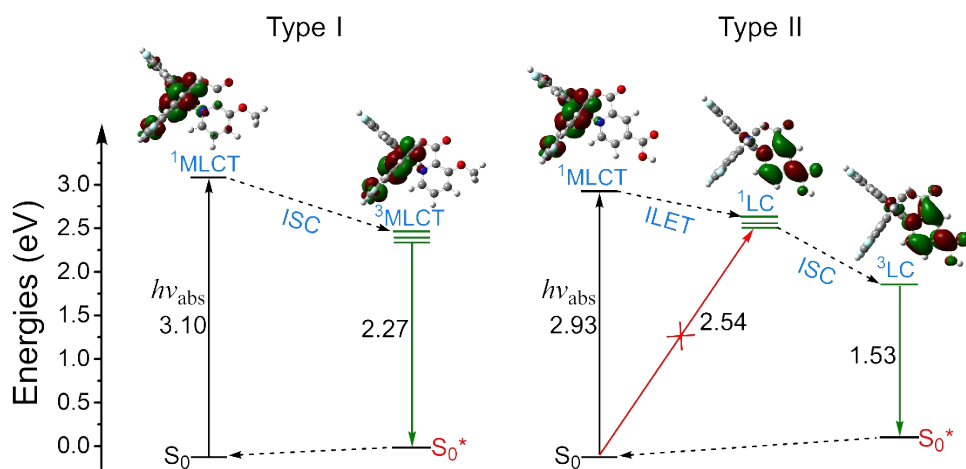

**Figure S3.** Calculated energy parameters for the degradation pathways of Ir emitters (left: complex **3**; right: complex **17**) in the  $S_0$  and the  $T_1$  states obtained at the  $\omega$ B97X-D/cc-pVDZ level.

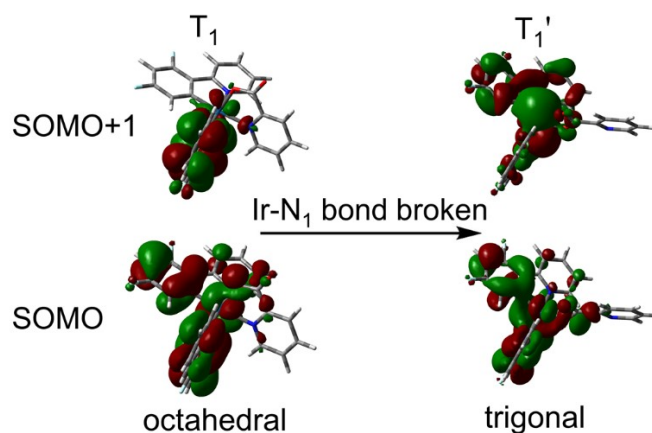

**Figure S4.** Contour plots of the SOMO (low) and SOMO+1 (high) energy orbitals of FIrpic. isosurface:  $1 \times 10^{-5}$  electrons/bohr<sup>3</sup>

**Table S2.** The main distribution (%) of the frontier molecular orbitals in different states of heteroleptic FIrpic.

|                         | HOMO (SOMO) |                           |                           |            | LUMO (SOMO+1) |                           |                           |            |
|-------------------------|-------------|---------------------------|---------------------------|------------|---------------|---------------------------|---------------------------|------------|
|                         | Ir          | <i>dfppy</i> <sub>1</sub> | <i>dfppy</i> <sub>2</sub> | picolinate | Ir            | <i>dfppy</i> <sub>1</sub> | <i>dfppy</i> <sub>2</sub> | picolinate |
| <b>S<sub>0</sub></b>    | 53          | 18                        | 21                        | 7          | 2             | 18                        | 5                         | 74         |
| <b>S<sub>0</sub>(p)</b> | 66          | 21                        | 13                        | 0          | 36            | 31                        | 32                        | 0          |
| <b>T<sub>1</sub></b>    | 40          | 33                        | 19                        | 9          | 7             | 87                        | 2                         | 4          |
| <b>T<sub>1</sub>'</b>   | 51          | 13                        | 19                        | 16         | 33            | 36                        | 27                        | 4          |

## Final Products

Losing carbon dioxide (CO<sub>2</sub>) unit from the picolinate ligand as final degradation product was observed in experimental studies.<sup>23</sup> According to this, dissociation process between –COO and pyridyl groups of picolinate radical and ion, (1) and (2) in Figure S5, are examined. Calculated E<sub>d</sub> results collected in Table S3 show that the dissociation process of picolinate neutral radical is an exothermal reaction and should be much easier to proceed than that of the picolinate ion. The

energy barrier for the dissociation of picolinate radical by losing of the CO<sub>2</sub> unit is only 0.25 eV (Figure S6).

To examine the dissociation process of picolinate ion by the loss of the CO<sub>2</sub> unit, further scan calculations were performed to examine the potential energy variation along with the C-C bond elongation between –COO and pyridyl parts of picolinate anion as shown in Figure S5. It is found that the energy potential surface for the C-C bond stretching is increased continually for the picolinate anion dissociation process and the required energy is about 2.5 eV. It means the loss of the CO<sub>2</sub> unit from picolinate anion is much harder to proceed than that from the picolinate neutral radical.

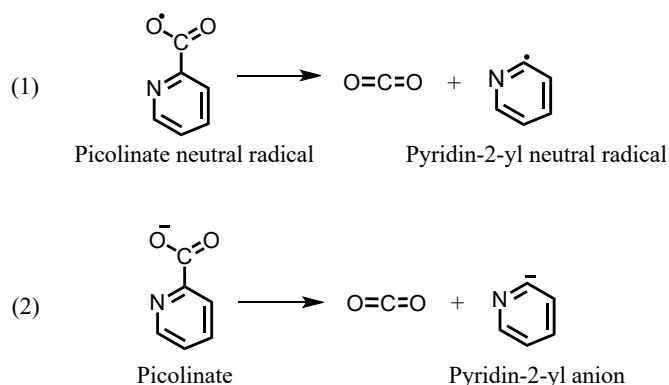

**Figure S5.** Proposed dissociation pathways for picolinate radical and ion for forming CO<sub>2</sub> product.

**Table S3.** Calculated dissociation energies ( $E_d$ ) and energy barriers ( $E_a$ ) for picolinate particles. (in eV)

|  | $E_d$ | $E_a$ |
|--|-------|-------|
|--|-------|-------|

|         |       |      |
|---------|-------|------|
| Radical | -0.10 | 0.25 |
| Anion   | 2.64  | --   |

Note: Dissociation energies of picolinate ligand were defined as:  $E_d = (E_{\text{CO}_2} + E_{\text{Pyridine ion/radical}}) - E_{\text{picolinate}}$ .

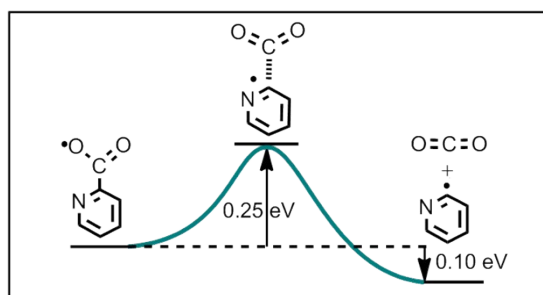

**Figure S6.** Proposed dissociation pathway for picolinate radical by losing one CO<sub>2</sub> unit.

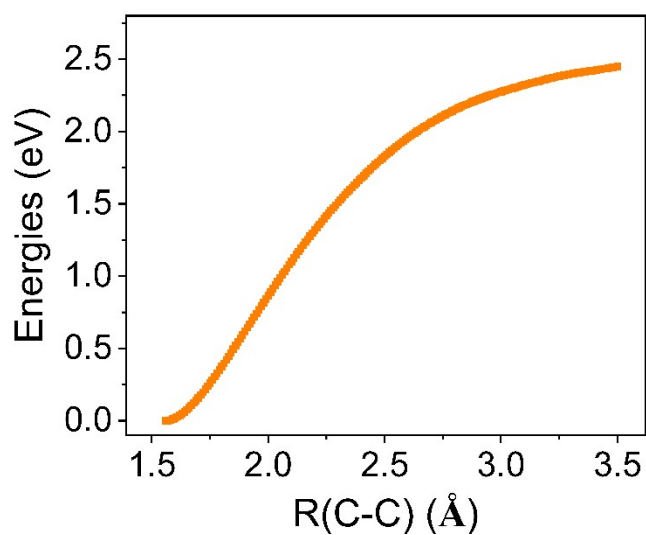

**Figure S7.** Scan calculation results for the potential energy variation along with the C-C bond stretching between -COO and pyridyl parts of picolinate ion.



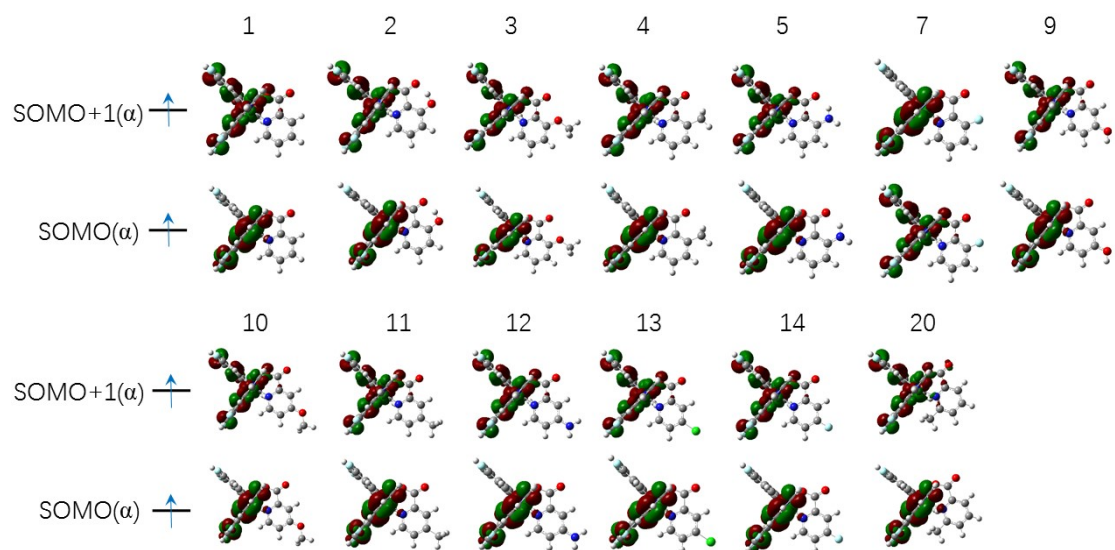

**Figure S8.** Contour plots of the SOMO (low) and SOMO+1 (high) energy orbitals of Type I emitters.

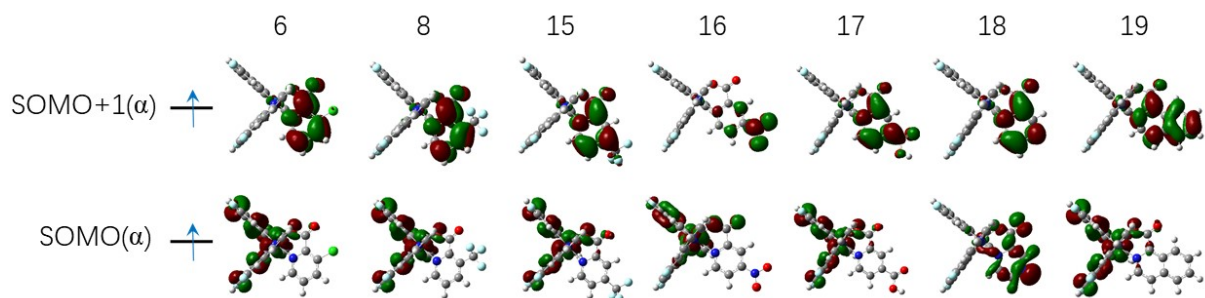

**Figure S9.** Contour plots of the SOMO (low) and SOMO+1 (high) energy orbitals of Type II emitters.

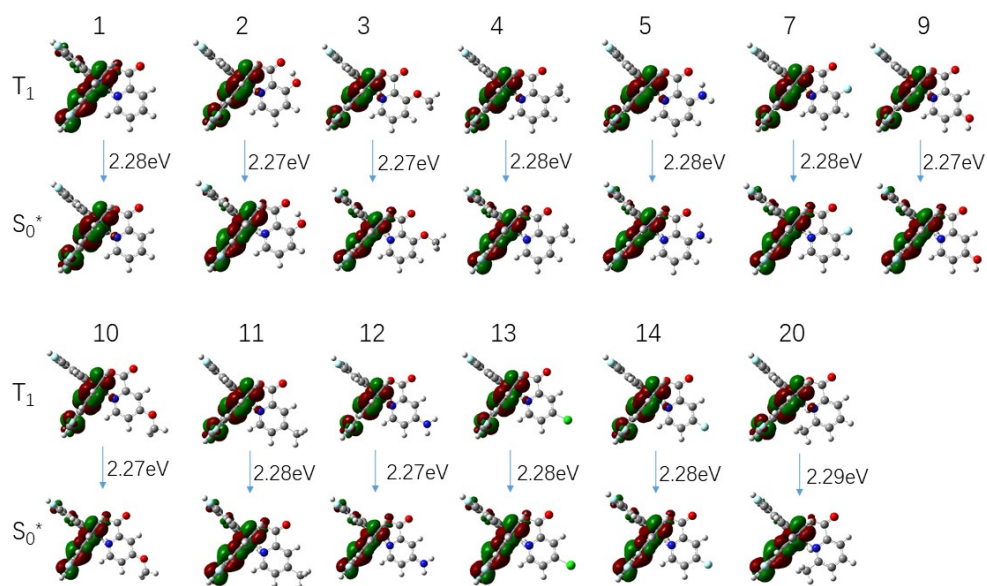

**Figure S10.** The nature of the orbitals involved in the  $T_1$  to  $S_0^*$  transition of Type I emitters.

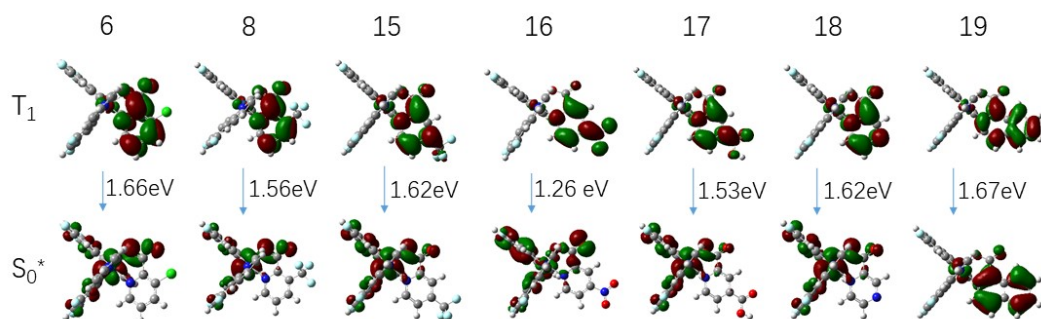

**Figure S11.** The nature of the orbitals involved in the  $T_1$  to  $S_0^*$  transition of Type II emitters.

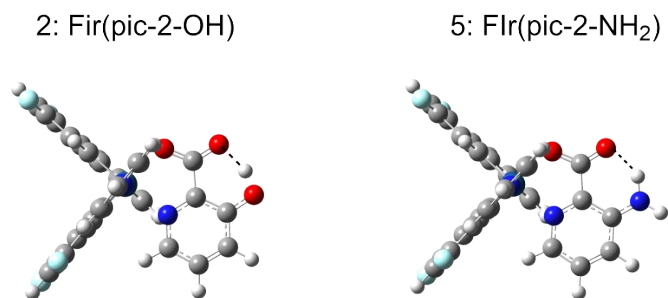

**Figure S12.** Optimized structures of Fir(pic-2-OH) and Fir(pic-2-NH<sub>2</sub>).

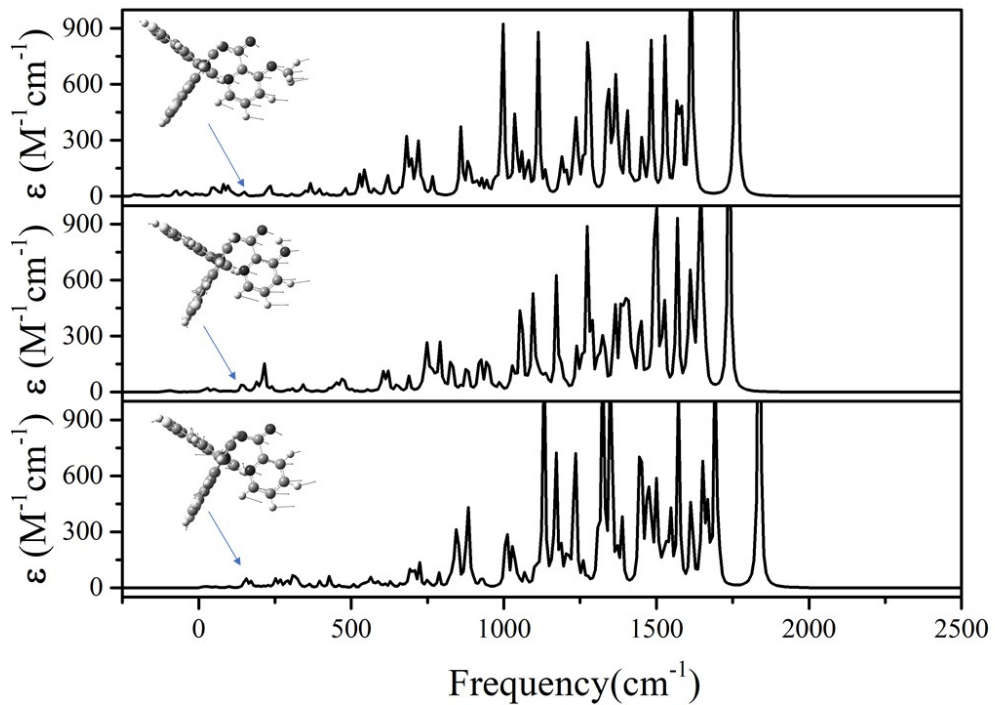

**Figure S13.** Vibration mode for Ir-N bond stretching in Flrpic, Flr(pic-2-OH) and Flr(pic-2-OMe) complexes.

**Table S4.** Cartesian coordinates for triplet geometry of complex 1.

| Atom | T <sub>1</sub> |        |        | TS     |        |        | T <sub>1</sub> ' |        |        | MECP   |        |        |
|------|----------------|--------|--------|--------|--------|--------|------------------|--------|--------|--------|--------|--------|
|      | x (Å)          | y (Å)  | z (Å)  | x (Å)  | y (Å)  | z (Å)  | x (Å)            | y (Å)  | z (Å)  | x (Å)  | y (Å)  | z (Å)  |
| Ir   | 0.132          | -0.323 | -0.256 | 0.215  | 0.259  | -0.115 | 0.202            | 0.002  | 0.000  | 0.202  | 0.002  | 0.000  |
| C    | 1.648          | 1.086  | -2.410 | 1.825  | 1.208  | -2.441 | -0.012           | -1.465 | -2.615 | -0.012 | -1.465 | -2.615 |
| C    | 1.462          | 2.273  | -0.346 | 3.069  | 0.166  | -0.744 | 1.316            | -2.524 | -0.993 | 1.316  | -2.524 | -0.993 |
| C    | 2.371          | 2.124  | -2.986 | 2.951  | 1.401  | -3.219 | 0.226            | -2.471 | -3.535 | 0.226  | -2.471 | -3.535 |
| H    | 1.395          | 0.186  | -2.961 | 0.832  | 1.499  | -2.765 | -0.672           | -0.626 | -2.810 | -0.672 | -0.626 | -2.810 |
| C    | 2.207          | 3.362  | -0.927 | 4.239  | 0.342  | -1.488 | 1.589            | -3.562 | -1.886 | 1.589  | -3.562 | -1.886 |
| C    | 2.651          | 3.289  | -2.211 | 4.177  | 0.966  | -2.725 | 1.047            | -3.530 | -3.162 | 1.047  | -3.530 | -3.162 |
| H    | 2.702          | 2.034  | -4.013 | 2.862  | 1.877  | -4.188 | -0.230           | -2.420 | -4.516 | -0.230 | -2.420 | -4.516 |
| H    | 2.399          | 4.235  | -0.321 | 5.177  | -0.021 | -1.097 | 2.214            | -4.384 | -1.571 | 2.214  | -4.384 | -1.571 |
| H    | 3.208          | 4.111  | -2.646 | 5.084  | 1.101  | -3.305 | 1.258            | -4.336 | -3.857 | 1.258  | -4.336 | -3.857 |
| C    | 0.166          | 0.946  | 1.246  | 1.602  | -0.674 | 1.031  | 1.284            | -1.310 | 1.139  | 1.284  | -1.310 | 1.139  |
| C    | 0.922          | 2.181  | 0.928  | 2.933  | -0.510 | 0.548  | 1.772            | -2.419 | 0.400  | 1.772  | -2.419 | 0.400  |
| C    | -0.394         | 0.797  | 2.513  | 1.405  | -1.295 | 2.270  | 1.669            | -1.143 | 2.470  | 1.669  | -1.143 | 2.470  |
| C    | 1.022          | 3.165  | 1.978  | 3.990  | -0.987 | 1.324  | 2.627            | -3.316 | 1.041  | 2.627  | -3.316 | 1.041  |
| C    | -0.240         | 1.790  | 3.465  | 2.495  | -1.751 | 2.992  | 2.514            | -2.072 | 3.056  | 2.514  | -2.072 | 3.056  |
| H    | -0.965         | -0.089 | 2.768  | 0.416  | -1.421 | 2.694  | 1.323            | -0.302 | 3.062  | 1.323  | -0.302 | 3.062  |
| C    | 0.470          | 2.985  | 3.206  | 3.801  | -1.614 | 2.542  | 3.010            | -3.167 | 2.364  | 3.010  | -3.167 | 2.364  |
| H    | 0.569          | 3.745  | 3.972  | 4.642  | -1.970 | 3.122  | 3.676            | -3.880 | 2.832  | 3.676  | -3.880 | 2.832  |
| N    | 1.205          | 1.129  | -1.158 | 1.889  | 0.629  | -1.233 | 0.535            | -1.485 | -1.389 | 0.535  | -1.485 | -1.389 |
| F    | -0.773         | 1.641  | 4.686  | 2.293  | -2.352 | 4.172  | 2.875            | -1.916 | 4.336  | 2.875  | -1.916 | 4.336  |
| F    | 1.697          | 4.308  | 1.741  | 5.262  | -0.844 | 0.906  | 3.126            | -4.380 | 0.384  | 3.126  | -4.380 | 0.384  |
| C    | -0.653         | -2.765 | 1.364  | -1.844 | -1.394 | 1.330  | -0.870           | 1.290  | 2.473  | -0.870 | 1.290  | 2.473  |
| C    | -2.431         | -1.555 | 0.434  | -2.332 | 0.895  | 1.203  | 0.397            | 2.708  | 1.092  | 0.397  | 2.708  | 1.092  |
| C    | -1.504         | -3.696 | 1.928  | -3.048 | -1.672 | 1.950  | -1.099           | 2.304  | 3.385  | -1.099 | 2.304  | 3.385  |
| H    | 0.421          | -2.832 | 1.481  | -1.131 | -2.170 | 1.076  | -1.294           | 0.298  | 2.580  | -1.294 | 0.298  | 2.580  |
| C    | -3.337         | -2.468 | 0.984  | -3.559 | 0.670  | 1.831  | 0.201            | 3.764  | 1.987  | 0.201  | 3.764  | 1.987  |
| C    | -2.873         | -3.537 | 1.730  | -3.916 | -0.616 | 2.204  | -0.543           | 3.556  | 3.138  | -0.543 | 3.556  | 3.138  |
| H    | -1.100         | -4.520 | 2.503  | -3.293 | -2.694 | 2.213  | -1.705           | 2.111  | 4.261  | -1.705 | 2.111  | 4.261  |
| H    | -4.394         | -2.330 | 0.816  | -4.224 | 1.501  | 2.008  | 0.620            | 4.733  | 1.764  | 0.620  | 4.733  | 1.764  |
| H    | -3.576         | -4.246 | 2.155  | -4.873 | -0.793 | 2.683  | -0.699           | 4.374  | 3.833  | -0.699 | 4.374  | 3.833  |
| C    | -1.648         | 0.383  | -0.829 | -0.591 | 2.142  | 0.015  | 1.029            | 1.560  | -0.974 | 1.029  | 1.560  | -0.974 |
| C    | -1.876         | 1.515  | -1.613 | -0.019 | 3.329  | -0.444 | 1.653            | 1.531  | -2.227 | 1.653  | 1.531  | -2.227 |
| C    | -2.754         | -0.382 | -0.379 | -1.814 | 2.184  | 0.730  | 1.089            | 2.752  | -0.196 | 1.089  | 2.752  | -0.196 |
| C    | -3.174         | 1.868  | -1.940 | -0.666 | 4.533  | -0.208 | 2.312            | 2.657  | -2.687 | 2.312  | 2.657  | -2.687 |
| H    | -1.059         | 2.128  | -1.975 | 0.922  | 3.339  | -0.983 | 1.637            | 0.644  | -2.851 | 1.637  | 0.644  | -2.851 |
| C    | -4.041         | 0.026  | -0.740 | -2.418 | 3.424  | 0.937  | 1.776            | 3.851  | -0.712 | 1.776  | 3.851  | -0.712 |
| C    | -4.280         | 1.143  | -1.518 | -1.868 | 4.609  | 0.479  | 2.392            | 3.832  | -1.951 | 2.392  | 3.832  | -1.951 |
| H    | -5.288         | 1.433  | -1.783 | -2.360 | 5.555  | 0.658  | 2.917            | 4.701  | -2.324 | 2.917  | 4.701  | -2.324 |
| N    | -1.098         | -1.725 | 0.644  | -1.493 | -0.149 | 0.973  | -0.122           | 1.484  | 1.375  | -0.122 | 1.484  | 1.375  |
| F    | -3.384         | 2.955  | -2.692 | -0.119 | 5.670  | -0.656 | 2.902            | 2.626  | -3.890 | 2.902  | 2.626  | -3.890 |

|   |        |        |        |        |        |        |        |        |        |        |        |        |
|---|--------|--------|--------|--------|--------|--------|--------|--------|--------|--------|--------|--------|
| F | -5.119 | -0.672 | -0.332 | -3.579 | 3.519  | 1.613  | 1.867  | 4.992  | -0.003 | 1.867  | 4.992  | -0.003 |
| C | 2.404  | -2.221 | -0.683 | -1.879 | -2.544 | -1.733 | -4.154 | -0.440 | -0.315 | -4.154 | -0.440 | -0.315 |
| C | 2.830  | -1.042 | 1.271  | -0.915 | -4.502 | -1.055 | -5.732 | -0.986 | 1.238  | -5.732 | -0.986 | 1.238  |
| C | 3.594  | -2.926 | -0.559 | -3.081 | -3.186 | -2.033 | -5.114 | -0.310 | -1.318 | -5.114 | -0.310 | -1.318 |
| C | 4.034  | -1.704 | 1.456  | -2.065 | -5.235 | -1.336 | -6.765 | -0.890 | 0.309  | -6.765 | -0.890 | 0.309  |
| H | 2.468  | -0.290 | 1.965  | -0.032 | -4.996 | -0.655 | -5.948 | -1.250 | 2.271  | -5.948 | -1.250 | 2.271  |
| C | 4.421  | -2.665 | 0.524  | -3.173 | -4.557 | -1.836 | -6.445 | -0.543 | -0.999 | -6.445 | -0.543 | -0.999 |
| H | 3.827  | -3.657 | -1.325 | -3.908 | -2.592 | -2.403 | -4.793 | -0.028 | -2.313 | -4.793 | -0.028 | -2.313 |
| H | 4.652  | -1.467 | 2.315  | -2.088 | -6.305 | -1.163 | -7.790 | -1.081 | 0.609  | -7.790 | -1.081 | 0.609  |
| H | 5.358  | -3.199 | 0.644  | -4.091 | -5.089 | -2.066 | -7.219 | -0.453 | -1.755 | -7.219 | -0.453 | -1.755 |
| N | 2.036  | -1.301 | 0.224  | -0.811 | -3.187 | -1.249 | -4.449 | -0.770 | 0.946  | -4.449 | -0.770 | 0.946  |
| O | 0.418  | -1.713 | -1.898 | -0.592 | -0.533 | -1.891 | -1.863 | -0.459 | 0.263  | -1.863 | -0.459 | 0.263  |
| C | 1.464  | -2.461 | -1.869 | -1.795 | -1.037 | -1.921 | -2.702 | -0.184 | -0.674 | -2.702 | -0.184 | -0.674 |
| O | 1.790  | -3.315 | -2.680 | -2.824 | -0.405 | -2.098 | -2.427 | 0.259  | -1.790 | -2.427 | 0.259  | -1.790 |

**Table S5.** Cartesian coordinates for triplet geometry of complex 2.

| Atom | T <sub>1</sub> |        |        | TS     |        |        | T <sub>1</sub> ' |        |        | MECP   |        |        |
|------|----------------|--------|--------|--------|--------|--------|------------------|--------|--------|--------|--------|--------|
|      | x (Å)          | y (Å)  | z (Å)  | x (Å)  | y (Å)  | z (Å)  | x (Å)            | y (Å)  | z (Å)  | x (Å)  | y (Å)  | z (Å)  |
| Ir   | 0.153          | -0.199 | -0.203 | 0.481  | 0.141  | -0.087 | 0.338            | 0.004  | 0.034  | 0.429  | 0.035  | 0.038  |
| C    | 1.121          | 1.619  | -2.370 | 2.067  | 0.977  | -2.473 | -0.141           | -1.365 | -2.599 | -0.139 | -1.361 | -2.589 |
| C    | 0.304          | 2.710  | -0.409 | 3.199  | -0.451 | -0.993 | 1.360            | -2.469 | -1.169 | 1.354  | -2.465 | -1.168 |
| C    | 1.398          | 2.838  | -2.979 | 3.142  | 1.013  | -3.342 | -0.003           | -2.337 | -3.573 | -0.003 | -2.333 | -3.571 |
| H    | 1.303          | 0.674  | -2.872 | 1.136  | 1.496  | -2.674 | -0.817           | -0.522 | -2.695 | -0.817 | -0.523 | -2.694 |
| C    | 0.583          | 3.984  | -1.025 | 4.315  | -0.444 | -1.832 | 1.537            | -3.474 | -2.122 | 1.539  | -3.472 | -2.121 |
| C    | 1.116          | 4.047  | -2.274 | 4.286  | 0.295  | -3.005 | 0.857            | -3.402 | -3.329 | 0.856  | -3.402 | -3.328 |
| H    | 1.817          | 2.850  | -3.977 | 3.076  | 1.586  | -4.258 | -0.565           | -2.256 | -4.496 | -0.564 | -2.256 | -4.496 |
| H    | 0.353          | 4.884  | -0.473 | 5.185  | -1.024 | -1.565 | 2.195            | -4.301 | -1.907 | 2.195  | -4.301 | -1.908 |
| H    | 1.321          | 5.006  | -2.736 | 5.150  | 0.299  | -3.661 | 0.992            | -4.183 | -4.071 | 0.992  | -4.183 | -4.070 |
| C    | -0.455         | 1.036  | 1.201  | 1.737  | -1.159 | 0.845  | 1.553            | -1.331 | 0.995  | 1.503  | -1.249 | 0.941  |
| C    | -0.248         | 2.458  | 0.837  | 3.029  | -1.209 | 0.251  | 1.966            | -2.408 | 0.168  | 1.947  | -2.400 | 0.183  |
| C    | -1.009         | 0.724  | 2.437  | 1.512  | -1.844 | 2.043  | 2.084            | -1.204 | 2.280  | 2.077  | -1.219 | 2.263  |
| C    | -0.641         | 3.441  | 1.818  | 4.024  | -1.956 | 0.882  | 2.894            | -3.315 | 0.678  | 2.893  | -3.307 | 0.676  |
| C    | -1.352         | 1.733  | 3.323  | 2.539  | -2.571 | 2.620  | 2.998            | -2.141 | 2.735  | 2.995  | -2.134 | 2.733  |
| H    | -1.186         | -0.306 | 2.724  | 0.552  | -1.814 | 2.546  | 1.801            | -0.387 | 2.936  | 1.801  | -0.390 | 2.935  |
| C    | -1.171         | 3.103  | 3.022  | 3.807  | -2.648 | 2.060  | 3.422            | -3.207 | 1.954  | 3.419  | -3.208 | 1.954  |
| H    | -1.453         | 3.867  | 3.736  | 4.601  | -3.216 | 2.527  | 4.141            | -3.927 | 2.320  | 4.141  | -3.928 | 2.320  |
| N    | 0.603          | 1.527  | -1.150 | 2.106  | 0.284  | -1.325 | 0.536            | -1.422 | -1.441 | 0.538  | -1.422 | -1.430 |
| F    | -1.876         | 1.428  | 4.518  | 2.312  | -3.231 | 3.763  | 3.499            | -2.024 | 3.971  | 3.499  | -2.024 | 3.970  |
| F    | -0.473         | 4.748  | 1.537  | 5.263  | -2.024 | 0.358  | 3.325            | -4.350 | -0.067 | 3.326  | -4.350 | -0.065 |
| C    | 0.316          | -2.666 | 1.552  | -1.772 | -1.218 | 1.363  | -0.461           | 1.163  | 2.671  | -0.463 | 1.161  | 2.657  |
| C    | -1.726         | -2.344 | 0.448  | -1.812 | 1.126  | 1.456  | 0.567            | 2.678  | 1.199  | 0.574  | 2.672  | 1.195  |
| C    | -0.120         | -3.837 | 2.142  | -2.989 | -1.318 | 2.011  | -0.621           | 2.137  | 3.639  | -0.618 | 2.133  | 3.638  |
| H    | 1.311          | -2.276 | 1.728  | -1.241 | -2.089 | 0.997  | -0.824           | 0.150  | 2.796  | -0.823 | 0.149  | 2.795  |
| C    | -2.219         | -3.523 | 1.019  | -3.039 | 1.081  | 2.121  | 0.438            | 3.696  | 2.147  | 0.438  | 3.694  | 2.145  |
| C    | -1.415         | -4.268 | 1.865  | -3.629 | -0.144 | 2.393  | -0.152           | 3.420  | 3.371  | -0.153 | 3.420  | 3.370  |
| H    | 0.540          | -4.392 | 2.796  | -3.426 | -2.294 | 2.183  | -1.106           | 1.890  | 4.575  | -1.106 | 1.891  | 4.575  |
| H    | -3.224         | -3.841 | 0.790  | -3.527 | 2.003  | 2.396  | 0.787            | 4.690  | 1.911  | 0.787  | 4.690  | 1.911  |
| H    | -1.797         | -5.182 | 2.307  | -4.591 | -0.179 | 2.893  | -0.258           | 4.209  | 4.108  | -0.258 | 4.209  | 4.108  |
| C    | -1.713         | -0.315 | -0.912 | 0.076  | 2.115  | 0.247  | 0.995            | 1.626  | -0.969 | 0.986  | 1.526  | -0.930 |
| C    | -2.326         | 0.585  | -1.784 | 0.845  | 3.208  | -0.157 | 1.473            | 1.661  | -2.284 | 1.460  | 1.674  | -2.263 |
| C    | -2.440         | -1.448 | -0.463 | -1.072 | 2.327  | 1.053  | 1.100            | 2.792  | -0.160 | 1.080  | 2.787  | -0.167 |
| C    | -3.627         | 0.355  | -2.199 | 0.464  | 4.486  | 0.220  | 2.031            | 2.828  | -2.776 | 2.032  | 2.824  | -2.773 |
| H    | -1.808         | 1.465  | -2.148 | 1.738  | 3.085  | -0.760 | 1.420            | 0.794  | -2.933 | 1.420  | 0.795  | -2.932 |
| C    | -3.749         | -1.625 | -0.916 | -1.406 | 3.635  | 1.400  | 1.680            | 3.935  | -0.711 | 1.679  | 3.924  | -0.708 |
| C    | -4.367         | -0.743 | -1.782 | -0.659 | 4.729  | 0.997  | 2.149            | 3.981  | -2.011 | 2.147  | 3.981  | -2.013 |
| H    | -5.382         | -0.907 | -2.117 | -0.942 | 5.732  | 1.286  | 2.595            | 4.883  | -2.410 | 2.595  | 4.883  | -2.410 |
| N    | -0.460         | -1.939 | 0.735  | -1.200 | -0.033 | 1.097  | 0.137            | 1.424  | 1.498  | 0.130  | 1.407  | 1.488  |
| F    | -4.207         | 1.224  | -3.036 | 1.200  | 5.532  | -0.175 | 2.481            | 2.858  | -4.037 | 2.480  | 2.859  | -4.036 |

|   |        |        |        |        |        |        |        |        |        |        |        |        |
|---|--------|--------|--------|--------|--------|--------|--------|--------|--------|--------|--------|--------|
| F | -4.473 | -2.687 | -0.513 | -2.485 | 3.888  | 2.164  | 1.808  | 5.056  | 0.024  | 1.809  | 5.056  | 0.022  |
| C | 3.015  | -1.030 | -0.373 | -2.743 | -1.601 | -1.611 | -4.029 | -0.540 | 0.138  | -4.026 | -0.539 | 0.134  |
| C | 2.776  | 0.304  | 1.516  | -2.882 | -3.846 | -1.166 | -5.417 | -1.375 | 1.759  | -5.416 | -1.375 | 1.759  |
| C | 4.390  | -1.207 | -0.136 | -4.147 | -1.449 | -1.559 | -5.112 | -0.266 | -0.726 | -5.112 | -0.266 | -0.726 |
| C | 4.132  | 0.175  | 1.812  | -4.279 | -3.798 | -1.100 | -6.552 | -1.151 | 0.973  | -6.552 | -1.151 | 0.973  |
| H | 2.094  | 0.878  | 2.134  | -2.353 | -4.783 | -1.012 | -5.508 | -1.811 | 2.751  | -5.508 | -1.811 | 2.751  |
| C | 4.946  | -0.581 | 0.989  | -4.919 | -2.589 | -1.296 | -6.401 | -0.591 | -0.280 | -6.400 | -0.591 | -0.280 |
| H | 4.537  | 0.670  | 2.687  | -4.848 | -4.699 | -0.894 | -7.536 | -1.413 | 1.348  | -7.536 | -1.413 | 1.348  |
| H | 6.005  | -0.705 | 1.188  | -5.998 | -2.491 | -1.250 | -7.244 | -0.391 | -0.932 | -7.244 | -0.391 | -0.932 |
| N | 2.249  | -0.292 | 0.447  | -2.137 | -2.777 | -1.410 | -4.191 | -1.078 | 1.353  | -4.191 | -1.078 | 1.353  |
| O | 1.107  | -1.434 | -1.734 | -0.605 | -0.549 | -1.789 | -1.692 | -0.524 | 0.493  | -1.671 | -0.519 | 0.499  |
| C | 2.350  | -1.663 | -1.573 | -1.884 | -0.382 | -1.800 | -2.635 | -0.215 | -0.310 | -2.621 | -0.215 | -0.311 |
| O | 3.066  | -2.349 | -2.323 | -2.438 | 0.725  | -1.923 | -2.467 | 0.336  | -1.422 | -2.470 | 0.337  | -1.419 |
| O | 5.145  | -1.939 | -0.940 | -4.757 | -0.278 | -1.728 | -4.963 | 0.281  | -1.933 | -4.963 | 0.281  | -1.932 |
| H | 4.520  | -2.267 | -1.656 | -4.022 | 0.380  | -1.862 | -3.989 | 0.446  | -2.027 | -3.988 | 0.446  | -2.027 |

**Table S6.** Cartesian coordinates for triplet geometry of complex 3.

| Atom | T <sub>1</sub> |        |        | TS     |        |        | T <sub>1</sub> ' |        |        | MECP   |        |        |
|------|----------------|--------|--------|--------|--------|--------|------------------|--------|--------|--------|--------|--------|
|      | x (Å)          | y (Å)  | z (Å)  | x (Å)  | y (Å)  | z (Å)  | x (Å)            | y (Å)  | z (Å)  | x (Å)  | y (Å)  | z (Å)  |
| Ir   | 0.022          | -0.176 | -0.184 | 0.506  | -0.145 | -0.085 | 0.478            | -0.020 | 0.553  | -0.058 | 0.070  | 0.553  |
| C    | 0.883          | 1.705  | -2.339 | 0.062  | -1.881 | -2.479 | -1.191           | -0.376 | -1.187 | -0.370 | -2.405 | -1.187 |
| C    | -0.154         | 2.725  | -0.444 | -0.786 | -2.749 | -0.472 | -1.071           | -2.264 | -1.072 | -2.252 | -1.032 | -1.072 |
| C    | 1.045          | 2.936  | -2.961 | -0.404 | -2.962 | -3.205 | -2.012           | -1.030 | -2.006 | -1.025 | -3.313 | -2.006 |
| H    | 1.200          | 0.777  | -2.803 | 0.575  | -1.047 | -2.943 | -0.907           | 0.665  | -0.911 | 0.661  | -2.531 | -0.911 |
| C    | -0.002         | 4.010  | -1.077 | -1.270 | -3.867 | -1.155 | -1.893           | -2.970 | -1.894 | -2.972 | -1.906 | -1.894 |
| C    | 0.582          | 4.114  | -2.301 | -1.072 | -3.975 | -2.523 | -2.357           | -2.352 | -2.357 | -2.352 | -3.057 | -2.357 |
| H    | 1.508          | 2.980  | -3.939 | -0.247 | -3.001 | -4.275 | -2.369           | -0.505 | -2.370 | -0.506 | -4.194 | -2.370 |
| H    | -0.367         | 4.885  | -0.558 | -1.806 | -4.631 | -0.612 | -2.160           | -3.991 | -2.160 | -3.991 | -1.682 | -2.160 |
| H    | 0.691          | 5.082  | -2.776 | -1.448 | -4.842 | -3.056 | -2.994           | -2.900 | -2.993 | -2.901 | -3.746 | -2.993 |
| C    | -0.771         | 1.002  | 1.178  | -0.489 | -1.163 | 1.370  | 0.225            | -1.822 | 0.246  | -1.722 | 0.942  | 0.246  |
| C    | -0.723         | 2.431  | 0.788  | -0.961 | -2.436 | 0.949  | -0.519           | -2.756 | -0.510 | -2.733 | 0.266  | -0.510 |
| C    | -1.320         | 0.649  | 2.411  | -0.633 | -0.793 | 2.711  | 0.790            | -2.219 | 0.772  | -2.220 | 2.204  | 0.772  |
| C    | -1.272         | 3.375  | 1.729  | -1.561 | -3.272 | 1.892  | -0.671           | -4.050 | -0.665 | -4.045 | 0.739  | -0.665 |
| C    | -1.813         | 1.623  | 3.259  | -1.243 | -1.662 | 3.599  | 0.603            | -3.517 | 0.606  | -3.509 | 2.668  | 0.606  |
| H    | -1.379         | -0.390 | 2.715  | -0.278 | 0.163  | 3.078  | 1.377            | -1.536 | 1.374  | -1.540 | 2.828  | 1.374  |
| C    | -1.794         | 2.998  | 2.925  | -1.717 | -2.910 | 3.218  | -0.125           | -4.454 | -0.127 | -4.452 | 1.951  | -0.127 |
| H    | -2.193         | 3.737  | 3.610  | -2.185 | -3.580 | 3.927  | -0.259           | -5.466 | -0.259 | -5.466 | 2.309  | -0.259 |
| N    | 0.315          | 1.576  | -1.143 | -0.101 | -1.793 | -1.151 | -0.719           | -0.983 | -0.705 | -0.995 | -1.291 | -0.705 |
| F    | -2.334         | 1.284  | 4.448  | -1.389 | -1.295 | 4.879  | 1.137            | -3.893 | 1.136  | -3.894 | 3.838  | 1.136  |
| F    | -1.261         | 4.688  | 1.421  | -2.017 | -4.489 | 1.538  | -1.367           | -4.977 | -1.366 | -4.978 | 0.059  | -1.366 |
| C    | 0.401          | -2.596 | 1.600  | 0.261  | 2.309  | 1.646  | 1.237            | 1.199  | 1.238  | 1.203  | 2.672  | 1.238  |
| C    | -1.633         | -2.505 | 0.441  | 2.429  | 1.858  | 0.873  | 2.861            | 1.396  | 2.861  | 1.389  | 0.993  | 2.861  |
| C    | 0.078          | -3.802 | 2.191  | 0.681  | 3.456  | 2.296  | 2.020            | 1.887  | 2.018  | 1.884  | 3.593  | 2.018  |
| H    | 1.345          | -2.102 | 1.794  | -0.782 | 1.998  | 1.631  | 0.243            | 0.840  | 0.238  | 0.837  | 2.925  | 0.238  |
| C    | -2.012         | -3.725 | 1.013  | 2.902  | 3.004  | 1.511  | 3.695            | 2.092  | 3.693  | 2.091  | 1.877  | 3.693  |
| C    | -1.156         | -4.371 | 1.888  | 2.024  | 3.803  | 2.228  | 3.273            | 2.332  | 3.274  | 2.330  | 3.177  | 3.274  |
| H    | 0.777          | -4.279 | 2.867  | -0.041 | 4.063  | 2.827  | 1.650            | 2.072  | 1.650  | 2.073  | 4.591  | 1.650  |
| H    | -2.971         | -4.152 | 0.762  | 3.946  | 3.264  | 1.431  | 4.654            | 2.445  | 4.653  | 2.446  | 1.534  | 4.653  |
| H    | -1.450         | -5.317 | 2.331  | 2.389  | 4.699  | 2.721  | 3.917            | 2.875  | 3.917  | 2.875  | 3.862  | 3.917  |
| C    | -1.794         | -0.505 | -0.952 | 2.487  | -0.115 | -0.580 | 2.036            | 0.482  | 1.979  | 0.441  | -1.073 | 1.979  |
| C    | -2.468         | 0.310  | -1.862 | 3.169  | -1.060 | -1.350 | 2.198            | 0.168  | 2.192  | 0.181  | -2.439 | 2.192  |
| C    | -2.410         | -1.702 | -0.504 | 3.215  | 0.923  | 0.057  | 3.110            | 1.097  | 3.089  | 1.092  | -0.413 | 3.089  |
| C    | -3.722         | -0.065 | -2.312 | 4.543  | -0.959 | -1.497 | 3.392            | 0.468  | 3.393  | 0.468  | -3.095 | 3.393  |
| H    | -2.033         | 1.233  | -2.227 | 2.654  | -1.881 | -1.836 | 1.411            | -0.308 | 1.414  | -0.307 | -3.039 | 1.414  |
| C    | -3.678         | -2.025 | -0.994 | 4.597  | 0.971  | -0.125 | 4.291            | 1.370  | 4.279  | 1.366  | -1.097 | 4.279  |
| C    | -4.356         | -1.228 | -1.896 | 5.283  | 0.049  | -0.897 | 4.458            | 1.070  | 4.455  | 1.070  | -2.445 | 4.455  |
| H    | -5.336         | -1.504 | -2.260 | 6.356  | 0.113  | -1.016 | 5.386            | 1.293  | 5.387  | 1.292  | -2.950 | 5.387  |
| N    | -0.427         | -1.963 | 0.757  | 1.114  | 1.524  | 0.969  | 1.655            | 0.944  | 1.617  | 0.925  | 1.413  | 1.617  |
| F    | -4.364         | 0.723  | -3.185 | 5.191  | -1.863 | -2.244 | 3.539            | 0.171  | 3.539  | 0.172  | -4.396 | 3.539  |



|   |        |        |        |        |       |        |        |        |        |        |        |        |
|---|--------|--------|--------|--------|-------|--------|--------|--------|--------|--------|--------|--------|
| F | -4.299 | -3.151 | -0.592 | 5.335  | 1.933 | 0.461  | 5.334  | 1.943  | 5.334  | 1.943  | -0.473 | 5.334  |
| C | 2.994  | -0.644 | -0.256 | -2.653 | 1.846 | -0.605 | -3.047 | 2.461  | -3.046 | 2.462  | 0.249  | -3.046 |
| C | 2.465  | 0.716  | 1.579  | -3.951 | 1.317 | 1.215  | -4.469 | 4.063  | -4.469 | 4.063  | 1.045  | -4.469 |
| C | 4.374  | -0.536 | 0.036  | -3.783 | 1.967 | -1.433 | -4.103 | 1.550  | -4.104 | 1.552  | 0.060  | -4.104 |
| C | 3.797  | 0.851  | 1.921  | -5.117 | 1.414 | 0.477  | -5.571 | 3.239  | -5.571 | 3.239  | 0.891  | -5.571 |
| H | 1.663  | 1.179  | 2.143  | -3.971 | 1.055 | 2.269  | -4.578 | 5.071  | -4.578 | 5.071  | 1.436  | -4.578 |
| C | 4.762  | 0.225  | 1.144  | -5.038 | 1.749 | -0.876 | -5.392 | 1.951  | -5.392 | 1.950  | 0.384  | -5.392 |
| H | 4.080  | 1.444  | 2.783  | -6.080 | 1.232 | 0.942  | -6.562 | 3.590  | -6.562 | 3.590  | 1.159  | -6.562 |
| H | 5.808  | 0.332  | 1.401  | -2.741 | 1.530 | 0.681  | -6.243 | 1.291  | -6.243 | 1.291  | 0.253  | -6.243 |
| N | 2.099  | -0.013 | 0.516  | -0.683 | 0.916 | -1.489 | -3.224 | 3.685  | -3.224 | 3.684  | 0.728  | -3.224 |
| O | 1.154  | -1.291 | -1.625 | -1.247 | 2.047 | -1.153 | -1.139 | 1.200  | -1.120 | 1.171  | 0.743  | -1.120 |
| C | 2.420  | -1.462 | -1.429 | -0.757 | 3.156 | -1.214 | -1.650 | 2.019  | -1.637 | 2.022  | -0.114 | -1.637 |
| O | 3.156  | -2.184 | -2.076 | -5.941 | 1.828 | -1.470 | -1.130 | 2.397  | -1.131 | 2.390  | -1.167 | -1.131 |
| O | 5.239  | -1.160 | -0.770 | -3.538 | 2.281 | -2.724 | -3.757 | 0.344  | -3.756 | 0.343  | -0.452 | -3.756 |
| C | 6.620  | -1.050 | -0.499 | -4.642 | 2.435 | -3.586 | -4.771 | -0.616 | -4.771 | -0.615 | -0.633 | -4.771 |
| H | 7.117  | -1.629 | -1.277 | -5.308 | 3.239 | -3.248 | -5.526 | -0.275 | -5.526 | -0.275 | -1.354 | -5.526 |
| H | 6.961  | -0.009 | -0.549 | -4.230 | 2.698 | -4.560 | -4.276 | -1.505 | -4.276 | -1.505 | -1.023 | -4.276 |
| H | 6.875  | -1.471 | 0.481  | -5.217 | 1.505 | -3.676 | -5.265 | -0.862 | -5.265 | -0.862 | 0.316  | -5.265 |

**Table S7.** Cartesian coordinates for triplet geometry of complex 4.

| Atom | T <sub>1</sub> |        |        | TS     |        |        | T <sub>1</sub> ' |        |        | MECP   |        |        |
|------|----------------|--------|--------|--------|--------|--------|------------------|--------|--------|--------|--------|--------|
|      | x (Å)          | y (Å)  | z (Å)  | x (Å)  | y (Å)  | z (Å)  | x (Å)            | y (Å)  | z (Å)  | x (Å)  | y (Å)  | z (Å)  |
| Ir   | 0.151          | -0.202 | -0.202 | 0.349  | -0.212 | -0.097 | 0.302            | -0.010 | 0.011  | 0.938  | 0.252  | 0.255  |
| C    | 1.115          | 1.616  | -2.368 | 0.408  | -1.866 | -2.584 | 0.300            | -1.776 | -2.406 | 0.296  | -1.744 | -2.347 |
| C    | 0.264          | 2.705  | -0.420 | -0.661 | -2.880 | -0.758 | 1.805            | -2.418 | -0.720 | 1.781  | -2.392 | -0.722 |
| C    | 1.379          | 2.834  | -2.981 | 0.143  | -2.945 | -3.406 | 0.684            | -2.831 | -3.215 | 0.678  | -2.809 | -3.204 |
| H    | 1.315          | 0.669  | -2.859 | 0.917  | -0.976 | -2.936 | -0.487           | -1.076 | -2.671 | -0.482 | -1.078 | -2.670 |
| C    | 0.526          | 3.979  | -1.041 | -0.948 | -4.000 | -1.543 | 2.231            | -3.494 | -1.501 | 2.230  | -3.478 | -1.487 |
| C    | 1.070          | 4.043  | -2.286 | -0.539 | -4.033 | -2.867 | 1.673            | -3.694 | -2.754 | 1.671  | -3.696 | -2.755 |
| H    | 1.805          | 2.847  | -3.976 | 0.462  | -2.927 | -4.440 | 0.211            | -2.968 | -4.180 | 0.214  | -2.968 | -4.181 |
| H    | 0.275          | 4.878  | -0.497 | -1.497 | -4.824 | -1.112 | 2.985            | -4.165 | -1.117 | 2.986  | -4.165 | -1.119 |
| H    | 1.262          | 5.002  | -2.752 | -0.763 | -4.900 | -3.479 | 2.002            | -4.530 | -3.363 | 2.002  | -4.530 | -3.363 |
| C    | -0.479         | 1.029  | 1.197  | -0.758 | -1.360 | 1.160  | 1.574            | -1.004 | 1.271  | 1.122  | -0.399 | 0.641  |
| C    | -0.293         | 2.451  | 0.826  | -1.063 | -2.645 | 0.631  | 2.243            | -2.088 | 0.643  | 2.140  | -1.988 | 0.638  |
| C    | -1.027         | 0.714  | 2.439  | -1.114 | -1.069 | 2.481  | 1.920            | -0.636 | 2.572  | 1.920  | -0.648 | 2.444  |
| C    | -0.709         | 3.432  | 1.798  | -1.716 | -3.568 | 1.450  | 3.237            | -2.754 | 1.360  | 3.171  | -2.713 | 1.365  |
| C    | -1.390         | 1.721  | 3.317  | -1.766 | -2.023 | 3.242  | 2.909            | -1.343 | 3.237  | 2.852  | -1.343 | 3.194  |
| H    | -1.187         | -0.318 | 2.730  | -0.889 | -0.110 | 2.933  | 1.432            | 0.192  | 3.077  | 1.432  | 0.184  | 3.079  |
| C    | -1.234         | 3.091  | 3.004  | -2.082 | -3.283 | 2.753  | 3.586            | -2.405 | 2.653  | 3.597  | -2.407 | 2.653  |
| H    | -1.532         | 3.856  | 3.711  | -2.585 | -4.021 | 3.364  | 4.362            | -2.942 | 3.183  | 4.364  | -2.945 | 3.181  |
| N    | 0.586          | 1.524  | -1.151 | 0.038  | -1.846 | -1.295 | 0.864            | -1.568 | -1.206 | 0.838  | -1.520 | -1.122 |
| F    | -1.910         | 1.417  | 4.515  | -2.114 | -1.730 | 4.503  | 3.236            | -0.997 | 4.489  | 3.238  | -1.000 | 4.486  |
| F    | -0.566         | 4.741  | 1.509  | -2.016 | -4.798 | 0.990  | 3.909            | -3.782 | 0.808  | 3.914  | -3.780 | 0.816  |
| C    | 0.332          | -2.672 | 1.548  | -0.360 | 2.133  | 1.650  | -1.075           | 1.380  | 2.271  | -1.057 | 1.341  | 2.195  |
| C    | -1.712         | -2.364 | 0.445  | 1.927  | 1.909  | 1.185  | 0.083            | 2.797  | 0.795  | 0.078  | 2.765  | 0.805  |
| C    | -0.095         | -3.847 | 2.136  | -0.152 | 3.294  | 2.373  | -1.484           | 2.448  | 3.048  | -1.471 | 2.437  | 3.044  |
| H    | 1.326          | -2.276 | 1.722  | -1.349 | 1.721  | 1.477  | -1.392           | 0.361  | 2.461  | -1.390 | 0.360  | 2.462  |
| C    | -2.196         | -3.547 | 1.015  | 2.192  | 3.074  | 1.906  | -0.293           | 3.907  | 1.555  | -0.281 | 3.891  | 1.538  |
| C    | -1.386         | -4.287 | 1.861  | 1.149  | 3.766  | 2.503  | -1.071           | 3.728  | 2.689  | -1.078 | 3.721  | 2.698  |
| H    | 0.571          | -4.399 | 2.789  | -0.996 | 3.813  | 2.810  | -2.118           | 2.273  | 3.909  | -2.118 | 2.277  | 3.909  |
| H    | -3.198         | -3.873 | 0.786  | 3.207  | 3.432  | 1.982  | 0.012            | 4.894  | 1.241  | 0.012  | 4.894  | 1.243  |
| H    | -1.762         | -5.204 | 2.301  | 1.353  | 4.675  | 3.058  | -1.369           | 4.588  | 3.279  | -1.369 | 4.588  | 3.279  |
| C    | -1.712         | -0.338 | -0.918 | 2.379  | -0.002 | -0.282 | 0.937            | 1.529  | -1.116 | 0.863  | 0.865  | -0.704 |
| C    | -2.327         | 0.554  | -1.796 | 3.250  | -0.855 | -0.962 | 1.599            | 1.450  | -2.348 | 1.578  | 1.442  | -2.256 |
| C    | -2.430         | -1.475 | -0.468 | 2.906  | 1.075  | 0.476  | 0.820            | 2.793  | -0.469 | 0.822  | 2.639  | -0.437 |
| C    | -3.625         | 0.312  | -2.215 | 4.615  | -0.627 | -0.902 | 2.130            | 2.597  | -2.910 | 2.080  | 2.574  | -2.869 |
| H    | -1.814         | 1.436  | -2.162 | 2.888  | -1.700 | -1.537 | 1.711            | 0.509  | -2.874 | 1.696  | 0.522  | -2.879 |
| C    | -3.737         | -1.663 | -0.925 | 4.289  | 1.253  | 0.502  | 1.386            | 3.910  | -1.083 | 1.334  | 3.846  | -1.102 |
| C    | -4.358         | -0.789 | -1.796 | 5.163  | 0.422  | -0.178 | 2.041            | 3.842  | -2.300 | 2.058  | 3.847  | -2.303 |
| H    | -5.371         | -0.962 | -2.134 | 6.232  | 0.586  | -0.137 | 2.470            | 4.727  | -2.752 | 2.469  | 4.730  | -2.751 |
| N    | -0.449         | -1.949 | 0.733  | 0.650  | 1.454  | 1.085  | -0.289           | 1.552  | 1.196  | -0.245 | 1.403  | 1.101  |
| F    | -4.209         | 1.173  | -3.058 | 5.447  | -1.443 | -1.563 | 2.758            | 2.518  | -4.091 | 2.757  | 2.522  | -4.091 |

|   |        |        |        |        |       |        |        |        |        |        |        |        |
|---|--------|--------|--------|--------|-------|--------|--------|--------|--------|--------|--------|--------|
| F | -4.455 | -2.730 | -0.520 | 4.841  | 2.257 | 1.210  | 1.314  | 5.120  | -0.497 | 1.319  | 5.121  | -0.505 |
| C | 3.059  | -0.992 | -0.356 | -2.534 | 2.076 | -1.162 | -3.969 | -0.765 | -0.037 | -3.949 | -0.759 | -0.070 |
| C | 2.720  | 0.366  | 1.517  | -4.178 | 1.196 | 0.181  | -5.399 | -0.530 | 1.738  | -5.392 | -0.528 | 1.738  |
| C | 4.433  | -1.104 | -0.083 | -3.432 | 2.939 | -1.812 | -4.979 | -1.271 | -0.874 | -4.975 | -1.271 | -0.868 |
| C | 4.061  | 0.309  | 1.853  | -5.155 | 1.984 | -0.413 | -6.470 | -1.033 | 1.009  | -6.469 | -1.034 | 1.004  |
| H | 1.992  | 0.916  | 2.104  | -4.424 | 0.504 | 0.982  | -5.529 | -0.218 | 2.772  | -5.529 | -0.218 | 2.770  |
| C | 4.911  | -0.432 | 1.044  | -4.768 | 2.861 | -1.420 | -6.246 | -1.409 | -0.309 | -6.248 | -1.410 | -0.305 |
| H | 4.426  | 0.834  | 2.727  | -6.190 | 1.916 | -0.094 | -7.451 | -1.128 | 1.463  | -7.451 | -1.128 | 1.462  |
| N | 2.247  | -0.272 | 0.441  | -2.899 | 1.232 | -0.192 | -4.172 | -0.408 | 1.236  | -4.174 | -0.415 | 1.227  |
| O | 1.125  | -1.405 | -1.699 | -0.552 | 0.877 | -1.673 | -1.650 | -0.798 | 0.334  | -1.622 | -0.850 | 0.295  |
| C | 2.379  | -1.659 | -1.563 | -1.051 | 2.069 | -1.505 | -2.558 | -0.556 | -0.549 | -2.374 | -0.423 | -0.549 |
| O | 3.055  | -2.357 | -2.305 | -0.446 | 3.123 | -1.619 | -2.359 | -0.173 | -1.702 | -2.416 | -0.236 | -1.612 |
| H | 5.969  | -0.493 | 1.286  | -5.505 | 3.495 | -1.906 | -7.058 | -1.811 | -0.909 | -7.058 | -1.810 | -0.909 |
| C | 5.389  | -1.896 | -0.934 | -2.990 | 3.899 | -2.884 | -4.736 | -1.658 | -2.309 | -4.735 | -1.658 | -2.304 |
| H | 5.082  | -2.941 | -0.998 | -2.294 | 4.634 | -2.474 | -4.523 | -0.775 | -2.914 | -4.521 | -0.774 | -2.914 |
| H | 5.395  | -1.528 | -1.961 | -2.457 | 3.380 | -3.686 | -3.868 | -2.315 | -2.405 | -3.868 | -2.314 | -2.405 |
| H | 6.398  | -1.835 | -0.517 | -3.850 | 4.414 | -3.318 | -5.610 | -2.174 | -2.717 | -5.609 | -2.173 | -2.718 |

**Table S8.** Cartesian coordinates for triplet geometry of complex 5.

| Atom | T <sub>1</sub> |        |        | TS     |        |        | T <sub>1</sub> ' |        |        | MECP   |        |        |
|------|----------------|--------|--------|--------|--------|--------|------------------|--------|--------|--------|--------|--------|
|      | x (Å)          | y (Å)  | z (Å)  | x (Å)  | y (Å)  | z (Å)  | x (Å)            | y (Å)  | z (Å)  | x (Å)  | y (Å)  | z (Å)  |
| Ir   | 0.157          | -0.195 | -0.208 | 0.463  | 0.156  | -0.092 | 0.307            | -0.004 | 0.010  | 0.407  | 0.030  | 0.017  |
| C    | 1.086          | 1.645  | -2.371 | 2.071  | 0.664  | -2.555 | 0.118            | -1.553 | -2.553 | 0.118  | -1.550 | -2.542 |
| C    | 0.241          | 2.715  | -0.410 | 3.105  | -0.736 | -0.980 | 1.608            | -2.444 | -0.969 | 1.605  | -2.439 | -0.969 |
| C    | 1.334          | 2.869  | -2.979 | 3.128  | 0.539  | -3.437 | 0.406            | -2.560 | -3.458 | 0.405  | -2.555 | -3.457 |
| H    | 1.291          | 0.703  | -2.870 | 1.185  | 1.245  | -2.785 | -0.623           | -0.781 | -2.736 | -0.622 | -0.781 | -2.735 |
| C    | 0.488          | 3.995  | -1.026 | 4.202  | -0.890 | -1.831 | 1.936            | -3.477 | -1.849 | 1.937  | -3.475 | -1.848 |
| C    | 1.020          | 4.071  | -2.275 | 4.213  | -0.246 | -3.059 | 1.337            | -3.528 | -3.100 | 1.337  | -3.528 | -3.099 |
| H    | 1.752          | 2.891  | -3.978 | 3.094  | 1.043  | -4.395 | -0.098           | -2.579 | -4.417 | -0.098 | -2.579 | -4.417 |
| H    | 0.234          | 4.889  | -0.475 | 5.024  | -1.521 | -1.529 | 2.646            | -4.230 | -1.544 | 2.646  | -4.230 | -1.545 |
| H    | 1.200          | 5.035  | -2.737 | 5.063  | -0.367 | -3.723 | 1.589            | -4.331 | -3.785 | 1.590  | -4.331 | -3.785 |
| C    | -0.473         | 1.023  | 1.202  | 1.624  | -1.171 | 0.924  | 1.537            | -1.190 | 1.138  | 1.482  | -1.122 | 1.080  |
| C    | -0.302         | 2.449  | 0.838  | 2.895  | -1.379 | 0.321  | 2.104            | -2.264 | 0.402  | 2.087  | -2.255 | 0.414  |
| C    | -1.011         | 0.697  | 2.444  | 1.362  | -1.744 | 2.173  | 1.946            | -0.960 | 2.453  | 1.941  | -0.974 | 2.435  |
| C    | -0.717         | 3.421  | 1.820  | 3.834  | -2.160 | 0.995  | 3.062            | -3.061 | 1.028  | 3.059  | -3.053 | 1.025  |
| C    | -1.376         | 1.695  | 3.331  | 2.333  | -2.514 | 2.791  | 2.895            | -1.792 | 3.024  | 2.893  | -1.787 | 3.021  |
| H    | -1.160         | -0.338 | 2.731  | 0.417  | -1.595 | 2.682  | 1.538            | -0.145 | 3.040  | 1.540  | -0.147 | 3.041  |
| C    | -1.232         | 3.069  | 3.027  | 3.580  | -2.741 | 2.225  | 3.472            | -2.849 | 2.334  | 3.469  | -2.850 | 2.334  |
| H    | -1.531         | 3.826  | 3.742  | 4.330  | -3.340 | 2.723  | 4.218            | -3.485 | 2.791  | 4.218  | -3.486 | 2.791  |
| N    | 0.568          | 1.541  | -1.152 | 2.072  | 0.062  | -1.356 | 0.720            | -1.489 | -1.355 | 0.715  | -1.483 | -1.341 |
| F    | -1.886         | 1.379  | 4.530  | 2.071  | -3.065 | 3.984  | 3.281            | -1.578 | 4.289  | 3.281  | -1.579 | 4.288  |
| F    | -0.585         | 4.733  | 1.539  | 5.053  | -2.376 | 0.463  | 3.639            | -4.085 | 0.372  | 3.640  | -4.085 | 0.374  |
| C    | 0.378          | -2.668 | 1.532  | -1.871 | -0.890 | 1.475  | -0.847           | 1.256  | 2.461  | -0.847 | 1.253  | 2.447  |
| C    | -1.678         | -2.377 | 0.447  | -1.689 | 1.449  | 1.424  | 0.324            | 2.728  | 1.050  | 0.328  | 2.723  | 1.047  |
| C    | -0.033         | -3.849 | 2.120  | -3.070 | -0.834 | 2.161  | -1.136           | 2.269  | 3.355  | -1.134 | 2.265  | 3.355  |
| H    | 1.369          | -2.262 | 1.700  | -1.435 | -1.828 | 1.151  | -1.216           | 0.243  | 2.581  | -1.216 | 0.243  | 2.580  |
| C    | -2.146         | -3.567 | 1.017  | -2.889 | 1.561  | 2.128  | 0.067            | 3.784  | 1.927  | 0.068  | 3.782  | 1.925  |
| C    | -1.322         | -4.300 | 1.853  | -3.581 | 0.416  | 2.492  | -0.658           | 3.549  | 3.086  | -0.658 | 3.548  | 3.086  |
| H    | 0.643          | -4.395 | 2.766  | -3.590 | -1.752 | 2.406  | -1.729           | 2.055  | 4.236  | -1.729 | 2.056  | 4.236  |
| H    | -3.147         | -3.902 | 0.795  | -3.278 | 2.540  | 2.362  | 0.424            | 4.774  | 1.686  | 0.423  | 4.774  | 1.687  |
| H    | -1.685         | -5.223 | 2.294  | -4.522 | 0.502  | 3.025  | -0.862           | 4.367  | 3.769  | -0.862 | 4.367  | 3.769  |
| C    | -1.711         | -0.345 | -0.908 | 0.240  | 2.175  | 0.099  | 1.001            | 1.587  | -1.007 | 0.986  | 1.494  | -0.955 |
| C    | -2.344         | 0.545  | -1.777 | 1.088  | 3.165  | -0.403 | 1.604            | 1.577  | -2.272 | 1.588  | 1.589  | -2.255 |
| C    | -2.414         | -1.491 | -0.458 | -0.857 | 2.547  | 0.920  | 0.997            | 2.793  | -0.248 | 0.982  | 2.781  | -0.259 |
| C    | -3.642         | 0.291  | -2.185 | 0.836  | 4.495  | -0.106 | 2.182            | 2.735  | -2.759 | 2.183  | 2.730  | -2.757 |
| H    | -1.843         | 1.433  | -2.143 | 1.946  | 2.922  | -1.020 | 1.632            | 0.681  | -2.880 | 1.632  | 0.683  | -2.880 |
| C    | -3.722         | -1.692 | -0.904 | -1.060 | 3.900  | 1.184  | 1.606            | 3.923  | -0.792 | 1.605  | 3.914  | -0.789 |
| C    | -4.360         | -0.820 | -1.765 | -0.233 | 4.892  | 0.684  | 2.201            | 3.924  | -2.041 | 2.198  | 3.924  | -2.042 |
| H    | -5.374         | -1.002 | -2.095 | -0.415 | 5.934  | 0.910  | 2.665            | 4.818  | -2.436 | 2.666  | 4.818  | -2.435 |
| N    | -0.417         | -1.951 | 0.725  | -1.198 | 0.218  | 1.125  | -0.114           | 1.478  | 1.358  | -0.117 | 1.461  | 1.344  |
| F    | -4.243         | 1.150  | -3.019 | 1.647  | 5.442  | -0.596 | 2.752            | 2.723  | -3.972 | 2.751  | 2.723  | -3.971 |

|   |        |        |        |        |        |        |        |        |        |        |        |        |
|---|--------|--------|--------|--------|--------|--------|--------|--------|--------|--------|--------|--------|
| F | -4.425 | -2.768 | -0.498 | -2.085 | 4.303  | 1.960  | 1.638  | 5.079  | -0.101 | 1.638  | 5.079  | -0.103 |
| C | 3.044  | -0.986 | -0.381 | -2.828 | -1.648 | -1.474 | -4.012 | -0.664 | -0.023 | -4.008 | -0.664 | -0.028 |
| C | 2.737  | 0.368  | 1.502  | -2.884 | -3.904 | -1.009 | -5.368 | -1.092 | 1.784  | -5.368 | -1.092 | 1.784  |
| C | 4.428  | -1.131 | -0.110 | -4.245 | -1.556 | -1.496 | -5.107 | -0.661 | -0.924 | -5.107 | -0.662 | -0.923 |
| C | 4.088  | 0.285  | 1.821  | -4.281 | -3.928 | -1.047 | -6.511 | -1.120 | 0.982  | -6.511 | -1.120 | 0.982  |
| H | 2.025  | 0.926  | 2.099  | -2.315 | -4.808 | -0.808 | -5.437 | -1.251 | 2.858  | -5.437 | -1.251 | 2.858  |
| C | 4.932  | -0.460 | 1.023  | -4.961 | -2.752 | -1.289 | -6.379 | -0.904 | -0.374 | -6.379 | -0.903 | -0.374 |
| H | 4.468  | 0.804  | 2.695  | -4.821 | -4.855 | -0.881 | -7.487 | -1.305 | 1.421  | -7.487 | -1.305 | 1.421  |
| N | 2.255  | -0.257 | 0.427  | -2.188 | -2.797 | -1.220 | -4.158 | -0.871 | 1.290  | -4.159 | -0.871 | 1.290  |
| O | 1.124  | -1.386 | -1.732 | -0.684 | -0.634 | -1.681 | -1.689 | -0.657 | 0.350  | -1.669 | -0.653 | 0.352  |
| C | 2.379  | -1.612 | -1.598 | -1.968 | -0.428 | -1.684 | -2.610 | -0.392 | -0.505 | -2.598 | -0.387 | -0.502 |
| O | 3.068  | -2.269 | -2.383 | -2.481 | 0.685  | -1.833 | -2.404 | 0.068  | -1.641 | -2.405 | 0.067  | -1.638 |
| H | 5.989  | -0.540 | 1.260  | -6.047 | -2.732 | -1.309 | -7.247 | -0.919 | -1.028 | -7.247 | -0.919 | -1.028 |
| N | 5.217  | -1.900 | -0.894 | -4.902 | -0.374 | -1.662 | -4.950 | -0.478 | -2.273 | -4.949 | -0.478 | -2.273 |
| H | 4.775  | -2.264 | -1.738 | -4.317 | 0.419  | -1.905 | -4.055 | -0.079 | -2.536 | -4.055 | -0.079 | -2.536 |
| H | 6.215  | -1.858 | -0.793 | -5.869 | -0.394 | -1.935 | -5.764 | -0.194 | -2.792 | -5.764 | -0.194 | -2.792 |

**Table S9.** Cartesian coordinates for triplet geometry of complex 6.

| Atom | T <sub>1</sub> |        |        | TS     |        |        | T <sub>1</sub> ' |        |        | MECP   |        |        |
|------|----------------|--------|--------|--------|--------|--------|------------------|--------|--------|--------|--------|--------|
|      | x (Å)          | y (Å)  | z (Å)  | x (Å)  | y (Å)  | z (Å)  | x (Å)            | y (Å)  | z (Å)  | x (Å)  | y (Å)  | z (Å)  |
| Ir   | -0.020         | -0.307 | -0.195 | -0.492 | 0.158  | -0.068 | -0.447           | 0.009  | 0.074  | -0.547 | 0.037  | 0.068  |
| C    | 1.598          | 1.239  | -2.199 | -0.062 | 2.025  | -2.367 | 0.842            | 1.485  | -2.201 | 0.833  | 1.484  | -2.189 |
| C    | 0.696          | 2.504  | -0.432 | 0.887  | 2.732  | -0.343 | -0.393           | 2.831  | -0.724 | -0.399 | 2.822  | -0.722 |
| C    | 2.230          | 2.348  | -2.734 | 0.426  | 3.128  | -3.042 | 1.196            | 2.577  | -2.974 | 1.199  | 2.572  | -2.972 |
| H    | 1.677          | 0.257  | -2.652 | -0.626 | 1.243  | -2.863 | 1.196            | 0.479  | -2.402 | 1.196  | 0.479  | -2.400 |
| C    | 1.312          | 3.651  | -0.934 | 1.396  | 3.869  | -0.973 | -0.068           | 3.962  | -1.473 | -0.069 | 3.961  | -1.473 |
| C    | 2.080          | 3.569  | -2.087 | 1.158  | 4.069  | -2.324 | 0.725            | 3.832  | -2.604 | 0.724  | 3.833  | -2.604 |
| H    | 2.824          | 2.244  | -3.633 | 0.237  | 3.239  | -4.103 | 1.833            | 2.436  | -3.839 | 1.829  | 2.436  | -3.839 |
| H    | 1.190          | 4.591  | -0.419 | 1.982  | 4.575  | -0.405 | -0.429           | 4.930  | -1.160 | -0.429 | 4.930  | -1.160 |
| H    | 2.562          | 4.459  | -2.476 | 1.555  | 4.950  | -2.817 | 0.981            | 4.711  | -3.187 | 0.981  | 4.711  | -3.186 |
| C    | -0.615         | 1.112  | 1.112  | 0.592  | 1.047  | 1.412  | -1.275           | 1.531  | 1.162  | -1.236 | 1.449  | 1.099  |
| C    | -0.131         | 2.403  | 0.779  | 1.097  | 2.325  | 1.051  | -1.178           | 2.793  | 0.518  | -1.171 | 2.779  | 0.535  |
| C    | -1.384         | 0.936  | 2.260  | 0.764  | 0.590  | 2.721  | -2.004           | 1.415  | 2.347  | -1.994 | 1.427  | 2.333  |
| C    | -0.464         | 3.468  | 1.618  | 1.759  | 3.079  | 2.021  | -1.817           | 3.885  | 1.105  | -1.816 | 3.876  | 1.100  |
| C    | -1.671         | 2.030  | 3.061  | 1.436  | 1.380  | 3.638  | -2.611           | 2.537  | 2.886  | -2.611 | 2.533  | 2.884  |
| H    | -1.765         | -0.038 | 2.546  | 0.384  | -0.372 | 3.043  | -2.110           | 0.464  | 2.859  | -2.109 | 0.467  | 2.859  |
| C    | -1.226         | 3.309  | 2.763  | 1.945  | 2.631  | 3.316  | -2.535           | 3.785  | 2.285  | -2.533 | 3.785  | 2.286  |
| H    | -1.464         | 4.155  | 3.394  | 2.460  | 3.240  | 4.047  | -3.021           | 4.652  | 2.714  | -3.021 | 4.652  | 2.713  |
| N    | 0.855          | 1.325  | -1.087 | 0.140  | 1.848  | -1.053 | 0.056            | 1.610  | -1.120 | 0.069  | 1.604  | -1.114 |
| F    | -2.407         | 1.856  | 4.163  | 1.610  | 0.931  | 4.888  | -3.301           | 2.426  | 4.028  | -3.302 | 2.427  | 4.028  |
| F    | -0.043         | 4.714  | 1.341  | 2.248  | 4.299  | 1.725  | -1.763           | 5.102  | 0.532  | -1.764 | 5.102  | 0.534  |
| C    | -0.397         | -2.613 | 1.672  | -0.281 | -2.403 | 1.508  | -0.457           | -1.728 | 2.507  | -0.454 | -1.733 | 2.499  |
| C    | -2.293         | -2.040 | 0.405  | -2.453 | -1.835 | 0.831  | -1.673           | -2.576 | 0.686  | -1.682 | -2.569 | 0.682  |
| C    | -1.071         | -3.638 | 2.309  | -0.721 | -3.572 | 2.103  | -0.749           | -2.835 | 3.282  | -0.749 | -2.826 | 3.279  |
| H    | 0.643          | -2.381 | 1.869  | 0.771  | -2.130 | 1.480  | 0.172            | -0.919 | 2.858  | 0.172  | -0.920 | 2.857  |
| C    | -3.020         | -3.060 | 1.025  | -2.947 | -3.001 | 1.416  | -2.004           | -3.712 | 1.430  | -2.001 | -3.706 | 1.428  |
| C    | -2.406         | -3.856 | 1.979  | -2.077 | -3.869 | 2.058  | -1.544           | -3.837 | 2.731  | -1.545 | -3.838 | 2.731  |
| H    | -0.556         | -4.248 | 3.040  | -0.005 | -4.233 | 2.575  | -0.355           | -2.907 | 4.288  | -0.354 | -2.907 | 4.288  |
| H    | -4.051         | -3.222 | 0.748  | -4.002 | -3.221 | 1.354  | -2.604           | -4.487 | 0.977  | -2.603 | -4.487 | 0.977  |
| H    | -2.967         | -4.650 | 2.459  | -2.458 | -4.779 | 2.509  | -1.795           | -4.719 | 3.310  | -1.795 | -4.719 | 3.310  |
| C    | -1.812         | -0.182 | -1.101 | -2.484 | 0.223  | -0.499 | -1.439           | -1.124 | -1.268 | -1.408 | -1.067 | -1.225 |
| C    | -2.175         | 0.726  | -2.095 | -3.156 | 1.238  | -1.186 | -1.711           | -0.796 | -2.601 | -1.711 | -0.813 | -2.586 |
| C    | -2.765         | -1.122 | -0.632 | -3.229 | -0.827 | 0.097  | -2.015           | -2.299 | -0.709 | -1.995 | -2.294 | -0.715 |
| C    | -3.459         | 0.687  | -2.615 | -4.536 | 1.192  | -1.295 | -2.530           | -1.620 | -3.352 | -2.525 | -1.613 | -3.347 |
| H    | -1.477         | 1.464  | -2.473 | -2.626 | 2.070  | -1.637 | -1.297           | 0.092  | -3.064 | -1.298 | 0.089  | -3.065 |
| C    | -4.043         | -1.112 | -1.192 | -4.617 | -0.818 | -0.043 | -2.837           | -3.086 | -1.516 | -2.834 | -3.076 | -1.513 |
| C    | -4.415         | -0.221 | -2.182 | -5.293 | 0.174  | -0.735 | -3.108           | -2.773 | -2.836 | -3.108 | -2.776 | -2.835 |
| H    | -5.413         | -0.237 | -2.600 | -6.371 | 0.152  | -0.824 | -3.751           | -3.403 | -3.437 | -3.751 | -3.403 | -3.436 |
| N    | -0.999         | -1.834 | 0.762  | -1.125 | -1.552 | 0.905  | -0.925           | -1.595 | 1.256  | -0.901 | -1.583 | 1.253  |
| F    | -3.803         | 1.558  | -3.570 | -5.174 | 2.162  | -1.964 | -2.783           | -1.306 | -4.629 | -2.782 | -1.307 | -4.626 |

|    |        |        |        |        |        |        |        |        |        |        |        |        |
|----|--------|--------|--------|--------|--------|--------|--------|--------|--------|--------|--------|--------|
| F  | -4.976 | -1.987 | -0.776 | -5.371 | -1.788 | 0.507  | -3.411 | -4.200 | -1.024 | -3.409 | -4.199 | -1.026 |
| C  | 2.825  | -1.131 | -0.058 | 2.633  | -1.902 | -0.814 | 3.801  | -0.921 | 0.446  | 3.797  | -0.924 | 0.438  |
| C  | 2.303  | 0.068  | 1.938  | 4.009  | -1.601 | 1.002  | 5.201  | -1.973 | 1.924  | 5.199  | -1.973 | 1.923  |
| C  | 4.197  | -1.089 | 0.319  | 3.732  | -1.928 | -1.673 | 4.875  | -0.223 | -0.114 | 4.879  | -0.205 | -0.124 |
| C  | 3.611  | 0.089  | 2.339  | 5.154  | -1.617 | 0.217  | 6.325  | -1.326 | 1.423  | 6.326  | -1.322 | 1.418  |
| H  | 1.521  | 0.526  | 2.536  | 4.074  | -1.467 | 2.079  | 5.293  | -2.684 | 2.742  | 5.293  | -2.684 | 2.742  |
| C  | 4.595  | -0.503 | 1.488  | 5.012  | -1.788 | -1.156 | 6.156  | -0.421 | 0.381  | 6.146  | -0.423 | 0.385  |
| H  | 3.890  | 0.554  | 3.276  | 6.134  | -1.498 | 0.664  | 7.307  | -1.518 | 1.839  | 7.307  | -1.518 | 1.840  |
| N  | 1.894  | -0.512 | 0.791  | 2.781  | -1.742 | 0.504  | 3.968  | -1.773 | 1.459  | 3.970  | -1.771 | 1.457  |
| O  | 0.892  | -1.757 | -1.225 | 0.679  | -0.839 | -1.544 | 1.583  | -0.231 | 0.763  | 1.572  | -0.233 | 0.758  |
| C  | 2.268  | -1.744 | -1.239 | 1.191  | -2.011 | -1.292 | 2.388  | -0.774 | -0.081 | 2.380  | -0.766 | -0.076 |
| O  | 2.840  | -2.209 | -2.215 | 0.644  | -3.093 | -1.360 | 2.116  | -1.169 | -1.211 | 2.111  | -1.170 | -1.203 |
| H  | 5.644  | -0.494 | 1.759  | 5.873  | -1.807 | -1.816 | 6.995  | 0.122  | -0.040 | 6.997  | 0.122  | -0.043 |
| Cl | 5.415  | -1.804 | -0.702 | 3.502  | -2.125 | -3.388 | 4.626  | 0.926  | -1.403 | 4.627  | 0.904  | -1.382 |

**Table S10.** Cartesian coordinates for triplet geometry of complex 7.

| Atom | T <sub>1</sub> |        |        | TS     |        |        | T <sub>1</sub> ' |        |        | MECP   |        |        |
|------|----------------|--------|--------|--------|--------|--------|------------------|--------|--------|--------|--------|--------|
|      | x (Å)          | y (Å)  | z (Å)  | x (Å)  | y (Å)  | z (Å)  | x (Å)            | y (Å)  | z (Å)  | x (Å)  | y (Å)  | z (Å)  |
| Ir   | 0.141          | -0.220 | -0.207 | 0.371  | -0.167 | -0.100 | 0.315            | 0.003  | 0.031  | 0.415  | 0.021  | 0.029  |
| C    | 1.184          | 1.554  | -2.372 | 0.092  | -2.037 | -2.414 | 0.030            | -1.746 | -2.387 | 0.030  | -1.743 | -2.375 |
| C    | 0.413          | 2.679  | -0.411 | -1.030 | -2.714 | -0.467 | 1.537            | -2.540 | -0.768 | 1.536  | -2.536 | -0.765 |
| C    | 1.509          | 2.759  | -2.983 | -0.354 | -3.141 | -3.116 | 0.270            | -2.833 | -3.210 | 0.270  | -2.829 | -3.209 |
| H    | 1.326          | 0.600  | -2.870 | 0.705  | -1.266 | -2.866 | -0.694           | -0.971 | -2.620 | -0.694 | -0.971 | -2.620 |
| C    | 0.740          | 3.940  | -1.030 | -1.500 | -3.851 | -1.128 | 1.818            | -3.651 | -1.564 | 1.819  | -3.649 | -1.563 |
| C    | 1.274          | 3.979  | -2.280 | -1.155 | -4.066 | -2.453 | 1.187            | -3.792 | -2.792 | 1.186  | -3.791 | -2.792 |
| H    | 1.926          | 2.753  | -3.982 | -0.079 | -3.265 | -4.156 | -0.257           | -2.919 | -4.151 | -0.257 | -2.919 | -4.152 |
| H    | 0.544          | 4.849  | -0.479 | -2.139 | -4.545 | -0.603 | 2.518            | -4.394 | -1.213 | 2.518  | -4.394 | -1.214 |
| H    | 1.515          | 4.929  | -2.743 | -1.521 | -4.947 | -2.970 | 1.403            | -4.655 | -3.412 | 1.403  | -4.655 | -3.412 |
| C    | -0.408         | 1.037  | 1.204  | -0.836 | -1.022 | 1.292  | 1.546            | -1.112 | 1.227  | 1.493  | -1.044 | 1.171  |
| C    | -0.147         | 2.450  | 0.837  | -1.340 | -2.293 | 0.902  | 2.070            | -2.257 | 0.572  | 2.054  | -2.249 | 0.581  |
| C    | -0.961         | 0.749  | 2.449  | -1.101 | -0.551 | 2.582  | 1.994            | -0.781 | 2.508  | 1.990  | -0.797 | 2.492  |
| C    | -0.499         | 3.448  | 1.818  | -2.090 | -3.025 | 1.823  | 3.026            | -3.022 | 1.242  | 3.022  | -3.015 | 1.239  |
| C    | -1.259         | 1.770  | 3.335  | -1.858 | -1.320 | 3.449  | 2.939            | -1.584 | 3.126  | 2.937  | -1.579 | 3.123  |
| H    | -1.177         | -0.275 | 2.738  | -0.727 | 0.406  | 2.926  | 1.622            | 0.092  | 3.032  | 1.622  | 0.090  | 3.032  |
| C    | -1.031         | 3.131  | 3.027  | -2.367 | -2.564 | 3.097  | 3.473            | -2.710 | 2.515  | 3.471  | -2.711 | 2.515  |
| H    | -1.279         | 3.907  | 3.741  | -2.950 | -3.156 | 3.790  | 4.216            | -3.323 | 3.008  | 4.217  | -3.323 | 3.007  |
| N    | 0.663          | 1.486  | -1.152 | -0.217 | -1.845 | -1.123 | 0.664            | -1.599 | -1.212 | 0.658  | -1.588 | -1.204 |
| F    | -1.784         | 1.489  | 4.536  | -2.119 | -0.857 | 4.679  | 3.362            | -1.273 | 4.358  | 3.362  | -1.273 | 4.357  |
| F    | -0.285         | 4.748  | 1.533  | -2.580 | -4.237 | 1.496  | 3.562            | -4.113 | 0.663  | 3.563  | -4.112 | 0.664  |
| C    | 0.202          | -2.708 | 1.526  | 0.088  | 2.421  | 1.414  | -0.747           | 1.495  | 2.394  | -0.748 | 1.491  | 2.380  |
| C    | -1.831         | -2.281 | 0.444  | 2.296  | 1.797  | 0.933  | 0.372            | 2.821  | 0.811  | 0.375  | 2.814  | 0.809  |
| C    | -0.282         | -3.863 | 2.109  | 0.498  | 3.598  | 2.013  | -1.013           | 2.590  | 3.195  | -1.010 | 2.585  | 3.194  |
| H    | 1.216          | -2.368 | 1.696  | -0.960 | 2.153  | 1.305  | -1.102           | 0.498  | 2.629  | -1.101 | 0.498  | 2.628  |
| C    | -2.373         | -3.441 | 1.008  | 2.762  | 2.970  | 1.529  | 0.138            | 3.958  | 1.588  | 0.139  | 3.956  | 1.587  |
| C    | -1.598         | -4.231 | 1.840  | 1.859  | 3.871  | 2.072  | -0.550           | 3.838  | 2.786  | -0.550 | 3.837  | 2.785  |
| H    | 0.358          | -4.456 | 2.750  | -0.241 | 4.284  | 2.410  | -1.576           | 2.462  | 4.111  | -1.576 | 2.462  | 4.111  |
| H    | -3.394         | -3.712 | 0.784  | 3.822  | 3.170  | 1.550  | 0.482            | 4.920  | 1.240  | 0.482  | 4.920  | 1.240  |
| H    | -2.019         | -5.131 | 2.276  | 2.219  | 4.786  | 2.530  | -0.737           | 4.719  | 3.391  | -0.737 | 4.719  | 3.390  |
| C    | -1.731         | -0.249 | -0.906 | 2.399  | -0.288 | -0.350 | 0.991            | 1.490  | -1.147 | 0.977  | 1.406  | -1.088 |
| C    | -2.304         | 0.683  | -1.772 | 3.104  | -1.327 | -0.961 | 1.559            | 1.358  | -2.420 | 1.545  | 1.372  | -2.406 |
| C    | -2.508         | -1.347 | -0.457 | 3.111  | 0.758  | 0.291  | 1.008            | 2.761  | -0.506 | 0.992  | 2.750  | -0.517 |
| C    | -3.617         | 0.516  | -2.180 | 4.490  | -1.312 | -0.948 | 2.126            | 2.462  | -3.030 | 2.126  | 2.457  | -3.027 |
| H    | -1.747         | 1.537  | -2.137 | 2.598  | -2.155 | -1.445 | 1.569            | 0.408  | -2.942 | 1.569  | 0.410  | -2.942 |
| C    | -3.827         | -1.459 | -0.902 | 4.505  | 0.717  | 0.275  | 1.602            | 3.834  | -1.171 | 1.602  | 3.826  | -1.167 |
| C    | -4.407         | -0.546 | -1.761 | 5.217  | -0.300 | -0.338 | 2.164            | 3.714  | -2.429 | 2.161  | 3.714  | -2.430 |
| H    | -5.431         | -0.659 | -2.090 | 6.299  | -0.303 | -0.331 | 2.618            | 4.565  | -2.919 | 2.618  | 4.565  | -2.919 |
| N    | -0.546         | -1.937 | 0.724  | 0.961  | 1.541  | 0.902  | -0.051           | 1.607  | 1.252  | -0.056 | 1.597  | 1.243  |
| F    | -4.160         | 1.415  | -3.011 | 5.163  | -2.306 | -1.542 | 2.664            | 2.333  | -4.250 | 2.664  | 2.333  | -4.249 |



|   |        |        |        |        |       |        |        |        |        |        |        |        |
|---|--------|--------|--------|--------|-------|--------|--------|--------|--------|--------|--------|--------|
| F | -4.599 | -2.486 | -0.496 | 5.228  | 1.683 | 0.873  | 1.653  | 5.050  | -0.594 | 1.653  | 5.050  | -0.595 |
| C | 2.990  | -1.147 | -0.404 | -2.421 | 2.071 | -1.232 | -4.007 | -0.511 | 0.048  | -4.004 | -0.510 | 0.046  |
| C | 2.769  | 0.215  | 1.488  | -3.994 | 1.553 | 0.366  | -5.561 | -0.175 | 1.702  | -5.561 | -0.175 | 1.702  |
| C | 4.353  | -1.288 | -0.133 | -3.420 | 2.549 | -2.077 | -4.977 | -1.101 | -0.763 | -4.977 | -1.101 | -0.762 |
| C | 4.117  | 0.103  | 1.794  | -5.042 | 2.002 | -0.429 | -6.582 | -0.751 | 0.952  | -6.582 | -0.751 | 0.952  |
| H | 2.080  | 0.793  | 2.096  | -4.178 | 1.146 | 1.356  | -5.762 | 0.212  | 2.698  | -5.762 | 0.212  | 2.698  |
| C | 4.926  | -0.663 | 0.967  | -4.747 | 2.515 | -1.689 | -6.281 | -1.234 | -0.315 | -6.280 | -1.234 | -0.315 |
| H | 4.523  | 0.609  | 2.662  | -6.065 | 1.951 | -0.075 | -7.587 | -0.825 | 1.352  | -7.587 | -0.825 | 1.352  |
| N | 2.242  | -0.395 | 0.422  | -2.720 | 1.582 | -0.027 | -4.305 | -0.064 | 1.271  | -4.305 | -0.065 | 1.271  |
| O | 1.037  | -1.468 | -1.722 | -0.441 | 0.898 | -1.753 | -1.700 | -0.590 | 0.449  | -1.685 | -0.585 | 0.444  |
| C | 2.276  | -1.796 | -1.603 | -0.952 | 2.091 | -1.631 | -2.588 | -0.313 | -0.442 | -2.580 | -0.311 | -0.433 |
| O | 2.915  | -2.534 | -2.331 | -0.388 | 3.153 | -1.806 | -2.384 | 0.095  | -1.582 | -2.380 | 0.095  | -1.578 |
| H | 5.987  | -0.787 | 1.152  | -5.516 | 2.879 | -2.361 | -7.023 | -1.704 | -0.951 | -7.023 | -1.704 | -0.951 |
| F | 5.140  | -2.014 | -0.912 | -3.096 | 3.020 | -3.285 | -4.656 | -1.574 | -1.969 | -4.656 | -1.574 | -1.969 |

**Table S11.** Cartesian coordinates for triplet geometry of complex 8.

| Atom | T <sub>1</sub> |        |        | TS     |        |        | T <sub>1</sub> ' |        |        | MECP   |        |        |
|------|----------------|--------|--------|--------|--------|--------|------------------|--------|--------|--------|--------|--------|
|      | x (Å)          | y (Å)  | z (Å)  | x (Å)  | y (Å)  | z (Å)  | x (Å)            | y (Å)  | z (Å)  | x (Å)  | y (Å)  | z (Å)  |
| Ir   | -0.461         | -0.263 | -0.361 | 1.029  | -0.011 | -0.069 | -0.919           | 0.000  | -0.030 | 0.809  | 0.152  | -0.056 |
| C    | 0.741          | 1.571  | -2.413 | 2.108  | 0.971  | -2.655 | -0.076           | -1.446 | 2.469  | -1.043 | 0.913  | 2.209  |
| C    | 0.326          | 2.535  | -0.308 | 3.627  | -0.294 | -1.380 | -1.656           | -2.581 | 1.153  | -0.466 | 2.597  | 0.728  |
| C    | 1.302          | 2.741  | -2.892 | 3.032  | 1.141  | -3.671 | -0.056           | -2.464 | 3.407  | -1.764 | 1.786  | 3.018  |
| H    | 0.657          | 0.677  | -3.021 | 1.092  | 1.353  | -2.704 | 0.561            | -0.570 | 2.531  | -0.984 | -0.135 | 2.456  |
| C    | 0.883          | 3.738  | -0.744 | 4.597  | -0.144 | -2.372 | -1.675           | -3.632 | 2.072  | -1.197 | 3.542  | 1.472  |
| C    | 1.372          | 3.837  | -2.039 | 4.297  | 0.582  | -3.516 | -0.876           | -3.568 | 3.204  | -1.850 | 3.132  | 2.627  |
| H    | 1.678          | 2.780  | -3.906 | 2.757  | 1.694  | -4.560 | 0.594            | -2.385 | 4.269  | -2.293 | 1.432  | 3.899  |
| H    | 0.935          | 4.578  | -0.069 | 5.565  | -0.604 | -2.246 | -2.305           | -4.489 | 1.888  | -1.255 | 4.572  | 1.153  |
| H    | 1.810          | 4.770  | -2.378 | 5.047  | 0.699  | -4.291 | -0.888           | -4.385 | 3.919  | -2.423 | 3.846  | 3.213  |
| C    | -0.669         | 0.920  | 1.254  | 2.545  | -1.176 | 0.636  | -2.149           | -1.369 | -0.923 | 0.849  | 1.474  | -0.984 |
| C    | -0.213         | 2.243  | 1.028  | 3.732  | -1.074 | -0.140 | -2.405           | -2.504 | -0.109 | 0.272  | 2.831  | -0.537 |
| C    | -1.162         | 0.556  | 2.504  | 2.561  | -1.907 | 1.826  | -2.821           | -1.224 | -2.137 | 1.535  | 1.933  | -2.277 |
| C    | -0.300         | 3.155  | 2.081  | 4.880  | -1.719 | 0.316  | -3.328           | -3.447 | -0.562 | 0.411  | 4.114  | -1.117 |
| C    | -1.212         | 1.504  | 3.514  | 3.732  | -2.532 | 2.225  | -3.721           | -2.199 | -2.538 | 1.666  | 3.189  | -2.876 |
| H    | -1.509         | -0.451 | 2.708  | 1.679  | -1.994 | 2.451  | -2.659           | -0.365 | -2.779 | 2.040  | 1.118  | -2.849 |
| C    | -0.790         | 2.812  | 3.329  | 4.907  | -2.454 | 1.489  | -3.994           | -3.320 | -1.769 | 1.109  | 4.327  | -2.302 |
| H    | -0.840         | 3.542  | 4.125  | 5.814  | -2.943 | 1.818  | -4.705           | -4.070 | -2.091 | 1.203  | 5.314  | -2.736 |
| N    | 0.267          | 1.481  | -1.163 | 2.414  | 0.296  | -1.536 | -0.868           | -1.499 | 1.386  | -0.308 | 1.314  | 1.120  |
| F    | -1.687         | 1.155  | 4.713  | 3.743  | -3.240 | 3.361  | -4.358           | -2.063 | -3.708 | 2.358  | 3.375  | -4.027 |
| F    | 0.103          | 4.426  | 1.917  | 6.029  | -1.644 | -0.381 | -3.614           | -4.538 | 0.174  | -0.129 | 5.241  | -0.564 |
| C    | -0.470         | -2.860 | 1.121  | -1.008 | -1.526 | 1.522  | -0.491           | 1.324  | -2.674 | 1.335  | -1.517 | -2.496 |
| C    | -2.584         | -2.110 | 0.418  | -1.071 | 0.804  | 1.803  | -1.465           | 2.694  | -1.033 | 2.754  | -1.882 | -0.695 |
| C    | -1.011         | -3.996 | 1.695  | -2.157 | -1.698 | 2.271  | -0.512           | 2.344  | -3.607 | 2.032  | -2.397 | -3.332 |
| H    | 0.592          | -2.644 | 1.128  | -0.502 | -2.353 | 1.039  | -0.069           | 0.348  | -2.884 | 0.457  | -0.978 | -2.887 |
| C    | -3.179         | -3.238 | 0.986  | -2.230 | 0.685  | 2.573  | -1.517           | 3.755  | -1.941 | 3.502  | -2.798 | -1.468 |
| C    | -2.389         | -4.179 | 1.628  | -2.775 | -0.570 | 2.802  | -1.045           | 3.574  | -3.232 | 3.142  | -3.058 | -2.787 |
| H    | -0.362         | -4.716 | 2.178  | -2.563 | -2.692 | 2.412  | -0.115           | 2.173  | -4.600 | 1.712  | -2.594 | -4.350 |
| H    | -4.249         | -3.368 | 0.915  | -2.705 | 1.574  | 2.959  | -1.913           | 4.707  | -1.623 | 4.349  | -3.313 | -1.028 |
| H    | -2.848         | -5.057 | 2.068  | -3.687 | -0.663 | 3.382  | -1.081           | 4.397  | -3.938 | 3.710  | -3.768 | -3.379 |
| C    | -2.402         | -0.006 | -0.811 | 0.610  | 1.914  | 0.410  | -1.576           | 1.526  | 1.115  | 1.791  | -0.533 | 1.074  |
| C    | -2.952         | 1.059  | -1.525 | 1.283  | 3.052  | -0.039 | -1.906           | 1.472  | 2.474  | 2.118  | -0.308 | 2.541  |
| C    | -3.250         | -1.031 | -0.315 | -0.410 | 2.045  | 1.390  | -1.854           | 2.712  | 0.378  | 2.933  | -1.511 | 0.691  |
| C    | -4.319         | 1.092  | -1.750 | 0.939  | 4.292  | 0.475  | -2.491           | 2.572  | 3.077  | 3.173  | -0.781 | 3.335  |
| H    | -2.334         | 1.863  | -1.909 | 2.071  | 2.993  | -0.781 | -1.718           | 0.588  | 3.072  | 1.414  | 0.360  | 3.079  |
| C    | -4.618         | -0.942 | -0.570 | -0.710 | 3.319  | 1.870  | -2.451           | 3.784  | 1.041  | 3.991  | -1.978 | 1.484  |
| C    | -5.175         | 0.104  | -1.284 | -0.053 | 4.456  | 1.431  | -2.777           | 3.743  | 2.385  | 4.155  | -1.620 | 2.826  |
| H    | -6.241         | 0.146  | -1.468 | -0.306 | 5.431  | 1.826  | -3.240           | 4.590  | 2.872  | 4.980  | -1.984 | 3.420  |
| N    | -1.239         | -1.945 | 0.516  | -0.477 | -0.313 | 1.304  | -0.977           | 1.491  | -1.434 | 1.716  | -1.172 | -1.277 |

|   |        |        |        |        |        |        |        |        |        |        |        |        |
|---|--------|--------|--------|--------|--------|--------|--------|--------|--------|--------|--------|--------|
| F | -4.844 | 2.110  | -2.438 | 1.583  | 5.382  | 0.040  | -2.799 | 2.519  | 4.379  | 3.297  | -0.416 | 4.629  |
| F | -5.459 | -1.890 | -0.121 | -1.664 | 3.489  | 2.805  | -2.741 | 4.920  | 0.379  | 4.971  | -2.797 | 0.998  |
| C | 2.311  | -1.128 | -0.914 | -2.620 | -1.216 | -1.431 | 3.432  | -0.250 | -0.614 | -3.159 | -2.003 | -0.546 |
| C | 2.316  | -0.158 | 1.240  | -3.695 | -3.157 | -0.896 | 4.700  | -0.792 | -2.431 | -4.298 | -3.490 | -1.875 |
| C | 3.706  | -1.174 | -0.913 | -3.798 | -0.477 | -1.329 | 4.562  | -0.040 | 0.175  | -4.362 | -1.361 | -0.196 |
| C | 3.677  | -0.201 | 1.301  | -4.917 | -2.511 | -0.739 | 5.890  | -0.618 | -1.731 | -5.532 | -2.935 | -1.562 |
| C | 4.411  | -0.724 | 0.179  | -3.625 | -4.232 | -0.748 | 4.723  | -1.087 | -3.478 | -4.233 | -4.345 | -2.546 |
| H | 4.197  | -1.575 | -1.792 | -4.960 | -1.138 | -0.956 | 5.811  | -0.232 | -0.398 | -5.559 | -1.840 | -0.707 |
| H | 4.191  | 0.159  | 2.184  | -3.770 | 0.588  | -1.525 | 4.434  | 0.274  | 1.204  | -6.444 | -3.341 | -1.982 |
| N | 1.601  | -0.615 | 0.177  | -5.806 | -3.064 | -0.459 | 6.847  | -0.771 | -2.216 | -3.140 | -3.036 | -1.399 |
| O | 0.187  | -1.510 | -1.813 | -2.561 | -2.532 | -1.212 | 3.492  | -0.617 | -1.897 | -1.013 | -0.870 | -0.870 |
| C | 1.520  | -1.580 | -2.046 | -0.250 | -1.110 | -1.417 | 1.074  | -0.351 | -0.728 | -1.802 | -1.516 | 0.002  |
| O | 1.956  | -1.985 | -3.112 | -1.329 | -0.454 | -1.689 | 2.069  | -0.037 | 0.023  | -1.549 | -1.842 | 1.170  |
| H | 1.733  | 0.242  | 2.064  | -1.396 | 0.722  | -2.040 | 2.013  | 0.407  | 1.169  | -6.495 | -1.359 | -0.446 |
| C | 5.897  | -0.746 | 0.232  | -6.229 | -0.364 | -0.717 | 7.059  | -0.074 | 0.431  | -4.353 | -0.172 | 0.731  |
| F | 6.355  | -1.462 | 1.284  | -7.320 | -1.129 | -0.882 | 6.926  | 0.896  | 1.347  | -5.555 | 0.446  | 0.744  |
| F | 6.415  | 0.495  | 0.384  | -6.265 | 0.111  | 0.541  | 7.345  | -1.209 | 1.091  | -3.449 | 0.747  | 0.350  |
| F | 6.448  | -1.270 | -0.875 | -6.337 | 0.686  | -1.542 | 8.125  | 0.225  | -0.328 | -4.077 | -0.502 | 2.000  |

**Table S12.** Cartesian coordinates for triplet geometry of complex 9.

| Atom | T <sub>1</sub> |        |        | TS     |        |        | T <sub>1</sub> ' |        |        | MECP   |        |        |
|------|----------------|--------|--------|--------|--------|--------|------------------|--------|--------|--------|--------|--------|
|      | x (Å)          | y (Å)  | z (Å)  | x (Å)  | y (Å)  | z (Å)  | x (Å)            | y (Å)  | z (Å)  | x (Å)  | y (Å)  | z (Å)  |
| Ir   | 0.062          | -0.230 | -0.277 | 0.487  | 0.066  | -0.109 | 0.374            | 0.000  | 0.009  | 0.474  | 0.013  | 0.007  |
| C    | 1.001          | 1.601  | -2.443 | 2.099  | -0.370 | -2.582 | -0.117           | -1.503 | -2.547 | -0.117 | -1.500 | -2.535 |
| C    | 0.533          | 2.648  | -0.347 | 2.462  | -1.948 | -0.881 | 1.302            | -2.586 | -1.020 | 1.300  | -2.582 | -1.018 |
| C    | 1.353          | 2.816  | -3.015 | 2.985  | -1.006 | -3.431 | 0.004            | -2.534 | -3.462 | 0.004  | -2.530 | -3.461 |
| H    | 1.015          | 0.673  | -3.006 | 1.538  | 0.510  | -2.874 | -0.759           | -0.642 | -2.703 | -0.759 | -0.642 | -2.702 |
| C    | 0.891          | 3.919  | -0.925 | 3.372  | -2.625 | -1.698 | 1.459            | -3.650 | -1.911 | 1.460  | -3.647 | -1.909 |
| C    | 1.291          | 4.002  | -2.221 | 3.636  | -2.148 | -2.972 | 0.813            | -3.618 | -3.138 | 0.812  | -3.617 | -3.138 |
| H    | 1.661          | 2.846  | -4.053 | 3.153  | -0.614 | -4.427 | -0.532           | -2.482 | -4.402 | -0.532 | -2.482 | -4.402 |
| H    | 0.826          | 4.802  | -0.305 | 3.851  | -3.520 | -1.331 | 2.077            | -4.490 | -1.633 | 2.077  | -4.490 | -1.633 |
| H    | 1.555          | 4.960  | -2.654 | 4.340  | -2.673 | -3.609 | 0.933            | -4.443 | -3.832 | 0.933  | -4.443 | -3.832 |
| C    | -0.237         | 0.968  | 1.252  | 0.979  | -1.539 | 1.027  | 1.494            | -1.336 | 1.082  | 1.446  | -1.258 | 1.031  |
| C    | 0.094          | 2.378  | 0.942  | 2.023  | -2.328 | 0.463  | 1.876            | -2.476 | 0.328  | 1.861  | -2.467 | 0.337  |
| C    | -0.677         | 0.636  | 2.532  | 0.527  | -1.839 | 2.318  | 1.993            | -1.163 | 2.374  | 1.987  | -1.177 | 2.357  |
| C    | -0.071         | 3.330  | 2.011  | 2.546  | -3.381 | 1.215  | 2.747            | -3.395 | 0.915  | 2.745  | -3.387 | 0.912  |
| C    | -0.798         | 1.614  | 3.503  | 1.083  | -2.900 | 3.012  | 2.848            | -2.114 | 2.907  | 2.846  | -2.108 | 2.904  |
| H    | -0.941         | -0.386 | 2.782  | -0.247 | -1.254 | 2.801  | 1.729            | -0.299 | 2.975  | 1.729  | -0.301 | 2.975  |
| C    | -0.496         | 2.973  | 3.252  | 2.094  | -3.692 | 2.485  | 3.244            | -3.239 | 2.198  | 3.241  | -3.240 | 2.198  |
| H    | -0.605         | 3.715  | 4.032  | 2.522  | -4.513 | 3.043  | 3.918            | -3.970 | 2.624  | 3.918  | -3.970 | 2.624  |
| N    | 0.608          | 1.491  | -1.177 | 1.864  | -0.817 | -1.339 | 0.530            | -1.523 | -1.371 | 0.528  | -1.515 | -1.361 |
| F    | -1.213         | 1.292  | 4.738  | 0.635  | -3.183 | 4.243  | 3.319            | -1.952 | 4.150  | 3.320  | -1.952 | 4.149  |
| F    | 0.214          | 4.628  | 1.782  | 3.538  | -4.146 | 0.721  | 3.150            | -4.489 | 0.240  | 3.151  | -4.489 | 0.242  |
| C    | 0.122          | -2.821 | 1.297  | -2.010 | 0.273  | 1.556  | -0.443           | 1.376  | 2.532  | -0.444 | 1.374  | 2.517  |
| C    | -1.974         | -2.198 | 0.458  | -0.835 | 2.284  | 1.291  | 0.779            | 2.710  | 1.032  | 0.782  | 2.703  | 1.029  |
| C    | -0.381         | -3.978 | 1.860  | -3.027 | 0.896  | 2.254  | -0.551           | 2.413  | 3.440  | -0.549 | 2.408  | 3.439  |
| H    | 1.170          | -2.558 | 1.377  | -2.034 | -0.785 | 1.318  | -0.907           | 0.409  | 2.687  | -0.907 | 0.409  | 2.686  |
| C    | -2.537         | -3.354 | 1.009  | -1.833 | 2.961  | 1.996  | 0.706            | 3.786  | 1.920  | 0.707  | 3.784  | 1.918  |
| C    | -1.739         | -4.243 | 1.710  | -2.931 | 2.265  | 2.476  | 0.045            | 3.632  | 3.129  | 0.045  | 3.632  | 3.128  |
| H    | 0.278          | -4.650 | 2.397  | -3.875 | 0.317  | 2.600  | -1.096           | 2.263  | 4.364  | -1.096 | 2.263  | 4.364  |
| H    | -3.591         | -3.544 | 0.878  | -1.745 | 4.027  | 2.145  | 1.153            | 4.730  | 1.648  | 1.153  | 4.730  | 1.649  |
| H    | -2.176         | -5.140 | 2.136  | -3.711 | 2.793  | 3.014  | -0.016           | 4.466  | 3.820  | -0.016 | 4.466  | 3.820  |
| C    | -1.868         | -0.096 | -0.781 | 1.176  | 1.999  | -0.077 | 1.189            | 1.503  | -1.057 | 1.167  | 1.411  | -1.006 |
| C    | -2.460         | 0.922  | -1.531 | 2.354  | 2.476  | -0.653 | 1.707            | 1.426  | -2.356 | 1.696  | 1.441  | -2.339 |
| C    | -2.671         | -1.168 | -0.314 | 0.372  | 2.871  | 0.699  | 1.368            | 2.701  | -0.307 | 1.349  | 2.693  | -0.318 |
| C    | -3.815         | 0.866  | -1.807 | 2.712  | 3.802  | -0.472 | 2.379            | 2.513  | -2.887 | 2.379  | 2.508  | -2.884 |
| H    | -1.882         | 1.759  | -1.904 | 3.001  | 1.835  | -1.242 | 1.598            | 0.533  | -2.960 | 1.598  | 0.535  | -2.959 |
| C    | -4.033         | -1.167 | -0.623 | 0.784  | 4.195  | 0.847  | 2.062            | 3.758  | -0.896 | 2.061  | 3.749  | -0.893 |
| C    | -4.631         | -0.167 | -1.366 | 1.944  | 4.685  | 0.273  | 2.574            | 3.693  | -2.180 | 2.572  | 3.693  | -2.181 |
| H    | -5.688         | -0.195 | -1.591 | 2.238  | 5.718  | 0.409  | 3.109            | 4.530  | -2.610 | 3.109  | 4.530  | -2.609 |
| N    | -0.647         | -1.954 | 0.623  | -0.944 | 0.944  | 1.095  | 0.227            | 1.517  | 1.376  | 0.220  | 1.505  | 1.368  |
| F    | -4.375         | 1.846  | -2.526 | 3.840  | 4.260  | -1.031 | 2.868            | 2.437  | -4.132 | 2.868  | 2.437  | -4.131 |

|   |        |        |        |        |        |        |        |        |        |        |        |        |
|---|--------|--------|--------|--------|--------|--------|--------|--------|--------|--------|--------|--------|
| F | -4.831 | -2.166 | -0.196 | 0.058  | 5.064  | 1.577  | 2.265  | 4.903  | -0.217 | 2.265  | 4.903  | -0.219 |
| C | 2.795  | -1.333 | -0.812 | -3.095 | -0.614 | -1.396 | -4.005 | -0.265 | 0.081  | -4.002 | -0.265 | 0.078  |
| C | 2.909  | -0.099 | 1.143  | -3.659 | -2.687 | -0.643 | -5.459 | -0.672 | 1.778  | -5.459 | -0.672 | 1.778  |
| C | 4.141  | -1.637 | -0.754 | -4.424 | -0.262 | -1.595 | -5.030 | -0.151 | -0.850 | -5.030 | -0.151 | -0.850 |
| C | 4.263  | -0.351 | 1.275  | -5.019 | -2.449 | -0.817 | -6.564 | -0.588 | 0.937  | -6.564 | -0.588 | 0.937  |
| H | 2.368  | 0.500  | 1.869  | -3.328 | -3.647 | -0.253 | -5.608 | -0.875 | 2.837  | -5.608 | -0.875 | 2.837  |
| C | 4.897  | -1.137 | 0.307  | -5.410 | -1.203 | -1.307 | -6.342 | -0.320 | -0.413 | -6.341 | -0.320 | -0.413 |
| H | 4.576  | -2.250 | -1.534 | -4.673 | 0.727  | -1.960 | -4.802 | 0.071  | -1.884 | -4.802 | 0.071  | -1.884 |
| H | 4.809  | 0.062  | 2.118  | -5.748 | -3.217 | -0.574 | -7.567 | -0.727 | 1.331  | -7.567 | -0.727 | 1.331  |
| N | 2.188  | -0.580 | 0.124  | -2.702 | -1.805 | -0.923 | -4.198 | -0.520 | 1.381  | -4.198 | -0.520 | 1.381  |
| O | 0.707  | -1.447 | -1.954 | -0.807 | -0.022 | -1.767 | -1.676 | -0.370 | 0.455  | -1.657 | -0.365 | 0.449  |
| C | 1.932  | -1.842 | -1.973 | -2.027 | 0.432  | -1.690 | -2.581 | -0.079 | -0.414 | -2.572 | -0.079 | -0.404 |
| O | 2.470  | -2.550 | -2.810 | -2.363 | 1.596  | -1.844 | -2.387 | 0.324  | -1.561 | -2.383 | 0.323  | -1.558 |
| O | 6.205  | -1.439 | 0.348  | -6.700 | -0.858 | -1.510 | -7.337 | -0.214 | -1.322 | -7.337 | -0.214 | -1.322 |
| H | 6.618  | -1.030 | 1.115  | -7.271 | -1.600 | -1.290 | -8.184 | -0.348 | -0.889 | -8.184 | -0.348 | -0.889 |

**Table S13.** Cartesian coordinates for triplet geometry of complex 10.

| Atom | T <sub>1</sub> |        |        | TS     |        |        | T <sub>1</sub> ' |        |        | MECP   |        |        |
|------|----------------|--------|--------|--------|--------|--------|------------------|--------|--------|--------|--------|--------|
|      | x (Å)          | y (Å)  | z (Å)  | x (Å)  | y (Å)  | z (Å)  | x (Å)            | y (Å)  | z (Å)  | x (Å)  | y (Å)  | z (Å)  |
| Ir   | -0.108         | -0.210 | -0.309 | 0.672  | 0.021  | -0.109 | 0.574            | -0.001 | 0.010  | 0.674  | 0.009  | 0.005  |
| C    | 0.592          | 1.701  | -2.495 | 2.102  | -0.612 | -2.650 | -0.028           | -1.513 | -2.517 | -0.027 | -1.509 | -2.506 |
| C    | 0.192          | 2.691  | -0.358 | 2.366  | -2.210 | -0.949 | 1.412            | -2.615 | -1.025 | 1.411  | -2.611 | -1.022 |
| C    | 0.839          | 2.942  | -3.067 | 2.869  | -1.351 | -3.532 | 0.043            | -2.553 | -3.427 | 0.044  | -2.549 | -3.426 |
| H    | 0.627          | 0.783  | -3.073 | 1.631  | 0.324  | -2.925 | -0.656           | -0.639 | -2.661 | -0.656 | -0.639 | -2.660 |
| C    | 0.440          | 3.988  | -0.934 | 3.152  | -2.991 | -1.799 | 1.519            | -3.689 | -1.911 | 1.521  | -3.686 | -1.909 |
| C    | 0.756          | 4.111  | -2.251 | 3.408  | -2.556 | -3.090 | 0.837            | -3.652 | -3.119 | 0.837  | -3.651 | -3.118 |
| H    | 1.082          | 3.003  | -4.120 | 3.032  | -0.987 | -4.539 | -0.520           | -2.496 | -4.351 | -0.519 | -2.496 | -4.351 |
| H    | 0.363          | 4.857  | -0.297 | 3.544  | -3.933 | -1.445 | 2.127            | -4.540 | -1.645 | 2.127  | -4.540 | -1.645 |
| H    | 0.938          | 5.089  | -2.683 | 4.016  | -3.162 | -3.753 | 0.919            | -4.485 | -3.809 | 0.919  | -4.485 | -3.809 |
| C    | -0.382         | 0.948  | 1.256  | 1.030  | -1.623 | 1.021  | 1.694            | -1.354 | 1.061  | 1.647  | -1.277 | 1.011  |
| C    | -0.151         | 2.378  | 0.950  | 1.950  | -2.530 | 0.419  | 2.029            | -2.508 | 0.305  | 2.014  | -2.498 | 0.315  |
| C    | -0.722         | 0.574  | 2.555  | 0.607  | -1.863 | 2.334  | 2.234            | -1.183 | 2.336  | 2.227  | -1.196 | 2.320  |
| C    | -0.305         | 3.305  | 2.043  | 2.385  | -3.630 | 1.157  | 2.896            | -3.441 | 0.873  | 2.894  | -3.434 | 0.870  |
| C    | -0.839         | 1.530  | 3.548  | 1.070  | -2.976 | 3.013  | 3.084            | -2.148 | 2.851  | 3.082  | -2.143 | 2.849  |
| H    | -0.911         | -0.465 | 2.803  | -0.072 | -1.191 | 2.845  | 2.007            | -0.309 | 2.938  | 2.007  | -0.311 | 2.938  |
| C    | -0.632         | 2.907  | 3.301  | 1.960  | -3.881 | 2.450  | 3.433            | -3.287 | 2.140  | 3.431  | -3.288 | 2.141  |
| H    | -0.735         | 3.632  | 4.099  | 2.318  | -4.742 | 2.997  | 4.104            | -4.030 | 2.552  | 4.104  | -4.030 | 2.552  |
| N    | 0.283          | 1.551  | -1.211 | 1.879  | -1.021 | -1.392 | 0.654            | -1.538 | -1.361 | 0.651  | -1.529 | -1.351 |
| F    | -1.159         | 1.168  | 4.800  | 0.651  | -3.200 | 4.266  | 3.594            | -1.988 | 4.079  | 3.594  | -1.989 | 4.078  |
| F    | -0.109         | 4.620  | 1.820  | 3.260  | -4.506 | 0.627  | 3.255            | -4.549 | 0.196  | 3.256  | -4.549 | 0.197  |
| C    | 0.197          | -2.814 | 1.216  | -1.702 | 0.523  | 1.668  | -0.141           | 1.417  | 2.540  | -0.143 | 1.414  | 2.526  |
| C    | -1.979         | -2.303 | 0.515  | -0.318 | 2.384  | 1.327  | 1.078            | 2.705  | 0.998  | 1.080  | 2.698  | 0.996  |
| C    | -0.203         | -4.005 | 1.788  | -2.606 | 1.263  | 2.407  | -0.197           | 2.463  | 3.442  | -0.195 | 2.458  | 3.441  |
| H    | 1.231          | -2.490 | 1.237  | -1.860 | -0.525 | 1.442  | -0.629           | 0.464  | 2.715  | -0.628 | 0.464  | 2.714  |
| C    | -2.439         | -3.498 | 1.079  | -1.195 | 3.176  | 2.071  | 1.057            | 3.789  | 1.879  | 1.058  | 3.787  | 1.877  |
| C    | -1.550         | -4.347 | 1.716  | -2.341 | 2.613  | 2.610  | 0.424            | 3.663  | 3.105  | 0.424  | 3.662  | 3.105  |
| H    | 0.525          | -4.644 | 2.273  | -3.497 | 0.788  | 2.798  | -0.722           | 2.335  | 4.381  | -0.722 | 2.336  | 4.381  |
| H    | -3.487         | -3.748 | 1.008  | -0.979 | 4.225  | 2.206  | 1.522            | 4.719  | 1.587  | 1.522  | 4.719  | 1.588  |
| H    | -1.908         | -5.275 | 2.152  | -3.029 | 3.230  | 3.179  | 0.403            | 4.504  | 3.791  | 0.403  | 4.504  | 3.790  |
| C    | -2.070         | -0.183 | -0.694 | 1.579  | 1.862  | -0.132 | 1.397            | 1.471  | -1.091 | 1.373  | 1.382  | -1.038 |
| C    | -2.763         | 0.808  | -1.390 | 2.774  | 2.198  | -0.769 | 1.877            | 1.371  | -2.403 | 1.866  | 1.386  | -2.387 |
| C    | -2.780         | -1.306 | -0.197 | 0.919  | 2.825  | 0.672  | 1.630            | 2.670  | -0.356 | 1.611  | 2.661  | -0.366 |
| C    | -4.128         | 0.677  | -1.585 | 3.291  | 3.476  | -0.619 | 2.563            | 2.434  | -2.961 | 2.563  | 2.430  | -2.959 |
| H    | -2.259         | 1.683  | -1.784 | 3.315  | 1.484  | -1.380 | 1.726            | 0.477  | -2.997 | 1.726  | 0.479  | -2.996 |
| C    | -4.156         | -1.381 | -0.424 | 1.486  | 4.094  | 0.786  | 2.336            | 3.702  | -0.972 | 2.335  | 3.694  | -0.969 |
| C    | -4.854         | -0.408 | -1.113 | 2.666  | 4.445  | 0.152  | 2.811            | 3.614  | -2.269 | 2.808  | 3.614  | -2.270 |
| H    | -5.920         | -0.494 | -1.275 | 3.082  | 5.437  | 0.262  | 3.356            | 4.432  | -2.720 | 3.356  | 4.432  | -2.719 |
| N    | -0.660         | -1.985 | 0.604  | -0.589 | 1.065  | 1.150  | 0.502            | 1.530  | 1.367  | 0.495  | 1.519  | 1.359  |
| F    | -4.786         | 1.632  | -2.253 | 4.435  | 3.798  | -1.236 | 3.014            | 2.336  | -4.219 | 3.014  | 2.337  | -4.218 |

|   |        |        |        |        |        |        |        |        |        |        |        |        |
|---|--------|--------|--------|--------|--------|--------|--------|--------|--------|--------|--------|--------|
| F | -4.868 | -2.430 | 0.034  | 0.901  | 5.045  | 1.540  | 2.590  | 4.846  | -0.308 | 2.590  | 4.846  | -0.310 |
| C | 2.646  | -1.145 | -1.024 | -3.028 | -0.223 | -1.227 | -3.804 | -0.170 | 0.223  | -3.802 | -0.170 | 0.220  |
| C | 2.806  | 0.065  | 0.941  | -3.820 | -2.196 | -0.418 | -5.208 | -0.521 | 1.972  | -5.208 | -0.521 | 1.971  |
| C | 4.006  | -1.368 | -1.046 | -4.307 | 0.287  | -1.383 | -4.858 | -0.050 | -0.670 | -4.858 | -0.050 | -0.670 |
| C | 4.180  | -0.106 | 0.995  | -5.149 | -1.795 | -0.546 | -6.345 | -0.429 | 1.169  | -6.345 | -0.429 | 1.169  |
| C | 4.800  | -0.841 | -0.023 | -3.599 | -3.185 | -0.023 | -5.327 | -0.705 | 3.038  | -5.327 | -0.705 | 3.038  |
| H | 4.431  | -1.943 | -1.860 | -5.398 | -0.516 | -1.044 | -6.163 | -0.187 | -0.192 | -6.162 | -0.187 | -0.192 |
| H | 4.734  | 0.331  | 1.816  | -4.446 | 1.294  | -1.756 | -4.663 | 0.150  | -1.716 | -4.663 | 0.150  | -1.716 |
| N | 2.053  | -0.441 | -0.038 | -5.944 | -2.473 | -0.259 | -7.326 | -0.545 | 1.614  | -7.326 | -0.545 | 1.614  |
| O | 0.502  | -1.364 | -2.040 | -2.770 | -1.450 | -0.747 | -3.959 | -0.401 | 1.535  | -3.959 | -0.401 | 1.535  |
| C | 1.745  | -1.687 | -2.140 | -0.702 | 0.067  | -1.701 | -1.467 | -0.320 | 0.521  | -1.449 | -0.316 | 0.515  |
| O | 2.270  | -2.349 | -3.020 | -1.850 | 0.675  | -1.579 | -2.395 | -0.020 | -0.321 | -2.386 | -0.020 | -0.313 |
| H | 2.276  | 0.620  | 1.710  | -2.039 | 1.870  | -1.737 | -2.230 | 0.365  | -1.479 | -2.227 | 0.364  | -1.477 |
| O | 6.116  | -1.084 | -0.097 | -6.622 | 0.021  | -1.222 | -7.155 | -0.069 | -1.099 | -7.155 | -0.069 | -1.099 |
| C | 6.959  | -0.555 | 0.911  | -7.747 | -0.772 | -0.903 | -8.486 | -0.198 | -0.644 | -8.486 | -0.198 | -0.644 |
| H | 7.969  | -0.866 | 0.648  | -7.760 | -1.042 | 0.160  | -8.734 | 0.573  | 0.095  | -8.734 | 0.573  | 0.095  |
| H | 6.910  | 0.539  | 0.935  | -8.621 | -0.160 | -1.128 | -9.119 | -0.071 | -1.522 | -9.119 | -0.071 | -1.522 |
| H | 6.701  | -0.957 | 1.897  | -7.779 | -1.685 | -1.509 | -8.667 | -1.188 | -0.208 | -8.667 | -1.188 | -0.208 |

**Table S14.** Cartesian coordinates for triplet geometry of complex 11.

| Atom | T <sub>1</sub> |        |        | TS     |        |        | T <sub>1</sub> ' |        |        | MECP   |        |        |
|------|----------------|--------|--------|--------|--------|--------|------------------|--------|--------|--------|--------|--------|
|      | x (Å)          | y (Å)  | z (Å)  | x (Å)  | y (Å)  | z (Å)  | x (Å)            | y (Å)  | z (Å)  | x (Å)  | y (Å)  | z (Å)  |
| Ir   | 0.060          | -0.225 | -0.277 | 0.492  | 0.076  | -0.110 | 0.378            | -0.001 | 0.009  | 0.478  | 0.011  | 0.006  |
| C    | 0.965          | 1.627  | -2.439 | 2.107  | -0.252 | -2.596 | -0.103           | -1.519 | -2.540 | -0.103 | -1.517 | -2.529 |
| C    | 0.483          | 2.661  | -0.341 | 2.569  | -1.820 | -0.910 | 1.348            | -2.572 | -1.021 | 1.346  | -2.567 | -1.019 |
| C    | 1.297          | 2.849  | -3.009 | 3.022  | -0.832 | -3.456 | 0.032            | -2.550 | -3.455 | 0.032  | -2.546 | -3.453 |
| H    | 0.994          | 0.700  | -3.005 | 1.496  | 0.597  | -2.877 | -0.763           | -0.671 | -2.692 | -0.763 | -0.671 | -2.692 |
| C    | 0.820          | 3.939  | -0.915 | 3.509  | -2.439 | -1.737 | 1.519            | -3.634 | -1.911 | 1.520  | -3.632 | -1.910 |
| C    | 1.217          | 4.031  | -2.212 | 3.738  | -1.939 | -3.009 | 0.864            | -3.617 | -3.134 | 0.863  | -3.616 | -3.134 |
| H    | 1.602          | 2.886  | -4.047 | 3.161  | -0.424 | -4.449 | -0.511           | -2.510 | -4.391 | -0.511 | -2.510 | -4.391 |
| H    | 0.743          | 4.818  | -0.293 | 4.039  | -3.310 | -1.381 | 2.155            | -4.462 | -1.636 | 2.155  | -4.462 | -1.636 |
| H    | 1.466          | 4.995  | -2.643 | 4.466  | -2.419 | -3.655 | 0.995            | -4.441 | -3.827 | 0.996  | -4.441 | -3.827 |
| C    | -0.261         | 0.964  | 1.255  | 1.078  | -1.507 | 1.011  | 1.529            | -1.314 | 1.077  | 1.480  | -1.240 | 1.027  |
| C    | 0.048          | 2.380  | 0.947  | 2.160  | -2.233 | 0.435  | 1.929            | -2.448 | 0.322  | 1.914  | -2.439 | 0.332  |
| C    | -0.697         | 0.624  | 2.533  | 0.652  | -1.841 | 2.302  | 2.033            | -1.128 | 2.366  | 2.027  | -1.142 | 2.348  |
| C    | -0.134         | 3.328  | 2.018  | 2.747  | -3.259 | 1.175  | 2.821            | -3.348 | 0.905  | 2.818  | -3.341 | 0.902  |
| C    | -0.835         | 1.599  | 3.506  | 1.272  | -2.873 | 2.986  | 2.910            | -2.062 | 2.894  | 2.908  | -2.057 | 2.892  |
| H    | -0.945         | -0.402 | 2.781  | -0.149 | -1.303 | 2.795  | 1.757            | -0.269 | 2.967  | 1.757  | -0.271 | 2.967  |
| C    | -0.555         | 2.962  | 3.257  | 2.322  | -3.603 | 2.446  | 3.322            | -3.181 | 2.185  | 3.320  | -3.181 | 2.186  |
| H    | -0.677         | 3.702  | 4.039  | 2.800  | -4.403 | 2.997  | 4.013            | -3.898 | 2.608  | 4.014  | -3.898 | 2.608  |
| N    | 0.576          | 1.507  | -1.174 | 1.906  | -0.720 | -1.355 | 0.553            | -1.525 | -1.369 | 0.549  | -1.515 | -1.359 |
| F    | -1.248         | 1.268  | 4.738  | 0.850  | -3.189 | 4.218  | 3.386            | -1.888 | 4.134  | 3.386  | -1.889 | 4.133  |
| F    | 0.131          | 4.631  | 1.791  | 3.777  | -3.964 | 0.670  | 3.240            | -4.436 | 0.230  | 3.240  | -4.436 | 0.232  |
| C    | 0.163          | -2.815 | 1.298  | -2.001 | 0.135  | 1.575  | -0.450           | 1.367  | 2.531  | -0.452 | 1.365  | 2.517  |
| C    | -1.943         | -2.229 | 0.455  | -0.940 | 2.209  | 1.316  | 0.743            | 2.717  | 1.023  | 0.745  | 2.711  | 1.021  |
| C    | -0.321         | -3.980 | 1.861  | -3.046 | 0.696  | 2.285  | -0.572           | 2.403  | 3.438  | -0.569 | 2.399  | 3.437  |
| H    | 1.205          | -2.532 | 1.382  | -1.969 | -0.921 | 1.331  | -0.899           | 0.393  | 2.690  | -0.898 | 0.393  | 2.690  |
| C    | -2.486         | -3.396 | 1.005  | -1.968 | 2.826  | 2.033  | 0.656            | 3.794  | 1.909  | 0.657  | 3.792  | 1.908  |
| C    | -1.674         | -4.269 | 1.708  | -3.022 | 2.067  | 2.516  | 0.004            | 3.631  | 3.122  | 0.003  | 3.631  | 3.121  |
| H    | 0.348          | -4.639 | 2.400  | -3.857 | 0.069  | 2.633  | -1.110           | 2.247  | 4.364  | -1.110 | 2.247  | 4.365  |
| H    | -3.536         | -3.604 | 0.871  | -1.938 | 3.893  | 2.190  | 1.087            | 4.745  | 1.634  | 1.087  | 4.745  | 1.634  |
| H    | -2.095         | -5.174 | 2.133  | -3.825 | 2.548  | 3.064  | -0.068           | 4.466  | 3.811  | -0.068 | 4.466  | 3.811  |
| C    | -1.873         | -0.124 | -0.781 | 1.076  | 2.044  | -0.066 | 1.162            | 1.513  | -1.065 | 1.140  | 1.424  | -1.011 |
| C    | -2.481         | 0.886  | -1.528 | 2.222  | 2.589  | -0.645 | 1.675            | 1.442  | -2.367 | 1.663  | 1.456  | -2.351 |
| C    | -2.656         | -1.211 | -0.317 | 0.229  | 2.865  | 0.720  | 1.326            | 2.715  | -0.319 | 1.308  | 2.705  | -0.331 |
| C    | -3.835         | 0.806  | -1.806 | 2.508  | 3.932  | -0.456 | 2.326            | 2.538  | -2.903 | 2.326  | 2.533  | -2.901 |
| H    | -1.919         | 1.734  | -1.899 | 2.900  | 1.989  | -1.242 | 1.577            | 0.546  | -2.969 | 1.577  | 0.548  | -2.968 |
| C    | -4.018         | -1.234 | -0.629 | 0.569  | 4.209  | 0.876  | 1.999            | 3.782  | -0.914 | 1.998  | 3.774  | -0.911 |
| C    | -4.633         | -0.243 | -1.369 | 1.697  | 4.766  | 0.299  | 2.506            | 3.723  | -2.200 | 2.503  | 3.723  | -2.200 |
| H    | -5.689         | -0.289 | -1.597 | 1.935  | 5.812  | 0.440  | 3.024            | 4.567  | -2.634 | 3.024  | 4.567  | -2.633 |
| N    | -0.620         | -1.962 | 0.621  | -0.976 | 0.866  | 1.110  | 0.211            | 1.517  | 1.373  | 0.207  | 1.506  | 1.363  |
| F    | -4.412         | 1.778  | -2.524 | 3.606  | 4.454  | -1.019 | 2.809            | 2.467  | -4.151 | 2.809  | 2.468  | -4.150 |



|   |        |        |        |        |        |        |        |        |        |        |        |        |
|---|--------|--------|--------|--------|--------|--------|--------|--------|--------|--------|--------|--------|
| F | -4.799 | -2.248 | -0.205 | -0.199 | 5.032  | 1.615  | 2.186  | 4.932  | -0.238 | 2.187  | 4.932  | -0.240 |
| C | 2.805  | -1.282 | -0.817 | -3.066 | -0.735 | -1.386 | -3.995 | -0.319 | 0.122  | -3.992 | -0.319 | 0.119  |
| C | 2.902  | -0.062 | 1.149  | -3.559 | -2.826 | -0.629 | -5.428 | -0.726 | 1.839  | -5.428 | -0.726 | 1.838  |
| C | 4.160  | -1.566 | -0.745 | -4.414 | -0.436 | -1.568 | -5.044 | -0.207 | -0.788 | -5.043 | -0.207 | -0.788 |
| C | 4.259  | -0.307 | 1.277  | -4.926 | -2.623 | -0.790 | -6.540 | -0.641 | 1.006  | -6.540 | -0.641 | 1.006  |
| C | 4.921  | -1.075 | 0.314  | -3.189 | -3.774 | -0.243 | -5.559 | -0.927 | 2.900  | -5.559 | -0.927 | 2.900  |
| H | 4.584  | -2.175 | -1.537 | -5.380 | -1.397 | -1.276 | -6.356 | -0.375 | -0.351 | -6.355 | -0.375 | -0.351 |
| H | 4.796  | 0.101  | 2.127  | -4.679 | 0.552  | -1.928 | -4.809 | 0.018  | -1.823 | -4.809 | 0.018  | -1.823 |
| N | 2.190  | -0.543 | 0.121  | -5.626 | -3.413 | -0.534 | -7.536 | -0.776 | 1.415  | -7.536 | -0.776 | 1.415  |
| O | 0.720  | -1.426 | -1.960 | -2.633 | -1.912 | -0.921 | -4.172 | -0.573 | 1.423  | -4.172 | -0.573 | 1.422  |
| C | 1.952  | -1.798 | -1.980 | -0.802 | -0.059 | -1.764 | -1.661 | -0.405 | 0.468  | -1.642 | -0.401 | 0.465  |
| O | 2.504  | -2.490 | -2.821 | -2.039 | 0.348  | -1.683 | -2.580 | -0.127 | -0.391 | -2.569 | -0.125 | -0.385 |
| H | 2.348  | 0.521  | 1.878  | -2.418 | 1.498  | -1.838 | -2.402 | 0.271  | -1.543 | -2.401 | 0.270  | -1.540 |
| C | 6.398  | -1.337 | 0.403  | -6.845 | -1.127 | -1.495 | -7.516 | -0.294 | -1.307 | -7.516 | -0.294 | -1.306 |
| H | 6.654  | -2.305 | -0.035 | -7.081 | -0.073 | -1.332 | -7.335 | 0.453  | -2.084 | -7.335 | 0.453  | -2.084 |
| H | 6.949  | -0.568 | -0.149 | -7.127 | -1.372 | -2.525 | -7.668 | -1.257 | -1.805 | -7.668 | -1.257 | -1.805 |
| H | 6.747  | -1.317 | 1.438  | -7.467 | -1.731 | -0.829 | -8.444 | -0.038 | -0.789 | -8.444 | -0.038 | -0.789 |

**Table S15.** Cartesian coordinates for triplet geometry of complex 12.

| Atom | T <sub>1</sub> |        |        | TS     |        |        | T <sub>1</sub> ' |        |        | MECP   |        |        |
|------|----------------|--------|--------|--------|--------|--------|------------------|--------|--------|--------|--------|--------|
|      | x (Å)          | y (Å)  | z (Å)  | x (Å)  | y (Å)  | z (Å)  | x (Å)            | y (Å)  | z (Å)  | x (Å)  | y (Å)  | z (Å)  |
| Ir   | 0.062          | -0.221 | -0.278 | 0.486  | 0.042  | -0.114 | 0.370            | -0.002 | 0.004  | 0.470  | 0.010  | 0.003  |
| C    | 0.969          | 1.622  | -2.445 | 1.985  | -0.572 | -2.619 | -0.050           | -1.544 | -2.540 | -0.050 | -1.542 | -2.530 |
| C    | 0.490          | 2.661  | -0.347 | 2.264  | -2.144 | -0.897 | 1.389            | -2.567 | -0.992 | 1.389  | -2.561 | -0.989 |
| C    | 1.302          | 2.842  | -3.017 | 2.791  | -1.295 | -3.478 | 0.112            | -2.579 | -3.445 | 0.112  | -2.574 | -3.444 |
| H    | 0.996          | 0.695  | -3.008 | 1.491  | 0.346  | -2.913 | -0.720           | -0.706 | -2.708 | -0.720 | -0.706 | -2.707 |
| C    | 0.827          | 3.937  | -0.924 | 3.091  | -2.909 | -1.723 | 1.589            | -3.632 | -1.871 | 1.590  | -3.631 | -1.870 |
| C    | 1.223          | 4.027  | -2.222 | 3.358  | -2.478 | -3.014 | 0.954            | -3.632 | -3.104 | 0.954  | -3.632 | -3.103 |
| H    | 1.607          | 2.877  | -4.055 | 2.963  | -0.937 | -4.486 | -0.417           | -2.553 | -4.390 | -0.417 | -2.553 | -4.390 |
| H    | 0.751          | 4.818  | -0.304 | 3.504  | -3.835 | -1.352 | 2.231            | -4.450 | -1.580 | 2.231  | -4.450 | -1.580 |
| H    | 1.472          | 4.989  | -2.655 | 3.998  | -3.072 | -3.658 | 1.107            | -4.459 | -3.789 | 1.107  | -4.459 | -3.789 |
| C    | -0.250         | 0.969  | 1.253  | 0.870  | -1.582 | 1.039  | 1.517            | -1.294 | 1.102  | 1.468  | -1.224 | 1.051  |
| C    | 0.060          | 2.383  | 0.944  | 1.830  | -2.464 | 0.465  | 1.946            | -2.427 | 0.361  | 1.931  | -2.417 | 0.372  |
| C    | -0.681         | 0.629  | 2.535  | 0.424  | -1.824 | 2.344  | 1.994            | -1.095 | 2.399  | 1.988  | -1.107 | 2.381  |
| C    | -0.116         | 3.331  | 2.014  | 2.282  | -3.545 | 1.222  | 2.839            | -3.311 | 0.966  | 2.836  | -3.304 | 0.962  |
| C    | -0.814         | 1.603  | 3.507  | 0.906  | -2.917 | 3.043  | 2.873            | -2.013 | 2.949  | 2.871  | -2.008 | 2.946  |
| H    | -0.929         | -0.397 | 2.783  | -0.288 | -1.170 | 2.833  | 1.694            | -0.236 | 2.989  | 1.694  | -0.238 | 2.990  |
| C    | -0.532         | 2.966  | 3.256  | 1.836  | -3.798 | 2.507  | 3.314            | -3.130 | 2.253  | 3.312  | -3.130 | 2.254  |
| H    | -0.649         | 3.706  | 4.037  | 2.208  | -4.644 | 3.070  | 4.007            | -3.835 | 2.694  | 4.007  | -3.835 | 2.693  |
| N    | 0.579          | 1.506  | -1.178 | 1.750  | -0.975 | -1.361 | 0.588            | -1.533 | -1.359 | 0.581  | -1.522 | -1.349 |
| F    | -1.221         | 1.275  | 4.743  | 0.466  | -3.144 | 4.288  | 3.323            | -1.827 | 4.196  | 3.324  | -1.827 | 4.196  |
| F    | 0.150          | 4.633  | 1.787  | 3.195  | -4.398 | 0.719  | 3.285            | -4.397 | 0.304  | 3.286  | -4.397 | 0.306  |
| C    | 0.168          | -2.809 | 1.300  | -1.935 | 0.487  | 1.613  | -0.535           | 1.378  | 2.493  | -0.536 | 1.376  | 2.479  |
| C    | -1.940         | -2.223 | 0.461  | -0.587 | 2.380  | 1.305  | 0.694            | 2.724  | 1.010  | 0.694  | 2.719  | 1.009  |
| C    | -0.316         | -3.974 | 1.865  | -2.862 | 1.201  | 2.349  | -0.683           | 2.420  | 3.390  | -0.681 | 2.416  | 3.389  |
| H    | 1.210          | -2.526 | 1.379  | -2.070 | -0.562 | 1.371  | -0.986           | 0.404  | 2.645  | -0.986 | 0.404  | 2.645  |
| C    | -2.482         | -3.389 | 1.014  | -1.489 | 3.147  | 2.046  | 0.580            | 3.806  | 1.887  | 0.582  | 3.804  | 1.885  |
| C    | -1.669         | -4.262 | 1.716  | -2.627 | 2.554  | 2.569  | -0.104           | 3.648  | 3.082  | -0.104 | 3.647  | 3.082  |
| H    | 0.355          | -4.632 | 2.403  | -3.746 | 0.703  | 2.727  | -1.246           | 2.267  | 4.302  | -1.246 | 2.268  | 4.302  |
| H    | -3.533         | -3.597 | 0.884  | -1.296 | 4.198  | 2.193  | 1.015            | 4.757  | 1.617  | 1.015  | 4.757  | 1.617  |
| H    | -2.090         | -5.166 | 2.143  | -3.332 | 3.151  | 3.139  | -0.196           | 4.486  | 3.765  | -0.196 | 4.486  | 3.765  |
| C    | -1.872         | -0.120 | -0.779 | 1.340  | 1.907  | -0.131 | 1.168            | 1.509  | -1.061 | 1.144  | 1.424  | -1.004 |
| C    | -2.482         | 0.887  | -1.528 | 2.535  | 2.275  | -0.753 | 1.711            | 1.433  | -2.350 | 1.698  | 1.446  | -2.336 |
| C    | -2.655         | -1.206 | -0.311 | 0.647  | 2.853  | 0.666  | 1.309            | 2.717  | -0.318 | 1.294  | 2.704  | -0.331 |
| C    | -3.836         | 0.807  | -1.803 | 3.017  | 3.564  | -0.594 | 2.370            | 2.529  | -2.877 | 2.370  | 2.524  | -2.875 |
| H    | -1.919         | 1.734  | -1.903 | 3.101  | 1.576  | -1.359 | 1.630            | 0.534  | -2.949 | 1.631  | 0.536  | -2.949 |
| C    | -4.018         | -1.229 | -0.619 | 1.182  | 4.135  | 0.790  | 1.993            | 3.782  | -0.903 | 1.992  | 3.775  | -0.899 |
| C    | -4.633         | -0.240 | -1.361 | 2.360  | 4.516  | 0.171  | 2.529            | 3.718  | -2.176 | 2.527  | 3.718  | -2.177 |
| H    | -5.691         | -0.285 | -1.586 | 2.750  | 5.518  | 0.288  | 3.055            | 4.562  | -2.603 | 3.055  | 4.562  | -2.602 |
| N    | -0.617         | -1.958 | 0.625  | -0.827 | 1.057  | 1.115  | 0.158            | 1.523  | 1.353  | 0.156  | 1.515  | 1.341  |
| F    | -4.415         | 1.778  | -2.522 | 4.160  | 3.916  | -1.198 | 2.882            | 2.454  | -4.114 | 2.882  | 2.455  | -4.113 |

|   |        |        |        |        |        |        |        |        |        |        |        |        |
|---|--------|--------|--------|--------|--------|--------|--------|--------|--------|--------|--------|--------|
| F | -4.798 | -2.241 | -0.192 | 0.564  | 5.069  | 1.539  | 2.161  | 4.937  | -0.229 | 2.162  | 4.937  | -0.230 |
| C | 2.803  | -1.296 | -0.812 | -3.174 | -0.425 | -1.324 | -3.999 | -0.346 | 0.071  | -3.997 | -0.346 | 0.068  |
| C | 2.914  | -0.065 | 1.140  | -3.882 | -2.395 | -0.439 | -5.442 | -0.709 | 1.781  | -5.442 | -0.709 | 1.781  |
| C | 4.148  | -1.594 | -0.752 | -4.471 | -0.033 | -1.622 | -5.030 | -0.268 | -0.855 | -5.030 | -0.268 | -0.855 |
| C | 4.264  | -0.310 | 1.274  | -5.214 | -2.112 | -0.708 | -6.549 | -0.657 | 0.945  | -6.550 | -0.657 | 0.945  |
| C | 4.921  | -1.097 | 0.309  | -5.534 | -0.893 | -1.323 | -5.588 | -0.880 | 2.846  | -5.588 | -0.880 | 2.846  |
| H | 4.562  | -2.207 | -1.544 | -4.629 | 0.939  | -2.077 | -6.351 | -0.428 | -0.422 | -6.351 | -0.428 | -0.422 |
| H | 4.805  | 0.102  | 2.119  | -5.989 | -2.827 | -0.448 | -4.785 | -0.077 | -1.894 | -4.785 | -0.077 | -1.894 |
| N | 2.188  | -0.547 | 0.122  | -2.862 | -1.588 | -0.736 | -7.548 | -0.794 | 1.349  | -7.548 | -0.794 | 1.349  |
| O | 0.718  | -1.428 | -1.958 | -0.858 | 0.009  | -1.727 | -4.180 | -0.561 | 1.380  | -4.180 | -0.561 | 1.379  |
| C | 1.949  | -1.808 | -1.977 | -2.046 | 0.544  | -1.647 | -1.668 | -0.429 | 0.430  | -1.648 | -0.426 | 0.430  |
| O | 2.494  | -2.504 | -2.820 | -2.305 | 1.723  | -1.830 | -2.582 | -0.160 | -0.438 | -2.569 | -0.157 | -0.436 |
| H | 2.372  | 0.532  | 1.867  | -3.622 | -3.333 | 0.047  | -2.394 | 0.225  | -1.593 | -2.397 | 0.225  | -1.590 |
| N | 6.248  | -1.394 | 0.418  | -6.831 | -0.570 | -1.652 | -7.405 | -0.404 | -1.313 | -7.405 | -0.404 | -1.313 |
| H | 6.720  | -1.790 | -0.379 | -7.568 | -1.061 | -1.175 | -8.318 | -0.212 | -0.931 | -8.318 | -0.212 | -0.931 |
| H | 6.820  | -0.860 | 1.050  | -7.028 | 0.399  | -1.843 | -7.233 | 0.045  | -2.198 | -7.233 | 0.045  | -2.198 |

**Table S16.** Cartesian coordinates for triplet geometry of complex 13.

| Atom | T <sub>1</sub> |        |        | TS     |        |        | T <sub>1</sub> ' |        |        | MECP   |        |        |
|------|----------------|--------|--------|--------|--------|--------|------------------|--------|--------|--------|--------|--------|
|      | x (Å)          | y (Å)  | z (Å)  | x (Å)  | y (Å)  | z (Å)  | x (Å)            | y (Å)  | z (Å)  | x (Å)  | y (Å)  | z (Å)  |
| Ir   | -0.079         | -0.202 | -0.286 | 0.671  | 0.082  | -0.103 | 0.573            | 0.002  | 0.022  | 0.673  | 0.011  | 0.012  |
| C    | 0.631          | 1.736  | -2.448 | 2.301  | -0.053 | -2.599 | -0.133           | -1.436 | -2.522 | -0.132 | -1.434 | -2.511 |
| C    | 0.096          | 2.712  | -0.335 | 2.856  | -1.655 | -0.974 | 1.382            | -2.572 | -1.132 | 1.381  | -2.566 | -1.129 |
| C    | 0.847          | 2.987  | -3.014 | 3.246  | -0.545 | -3.480 | -0.099           | -2.449 | -3.465 | -0.099 | -2.445 | -3.464 |
| H    | 0.729          | 0.820  | -3.022 | 1.642  | 0.771  | -2.848 | -0.770           | -0.563 | -2.613 | -0.770 | -0.562 | -2.613 |
| C    | 0.313          | 4.018  | -0.905 | 3.828  | -2.187 | -1.824 | 1.453            | -3.618 | -2.053 | 1.454  | -3.616 | -2.052 |
| C    | 0.679          | 4.152  | -2.208 | 4.025  | -1.625 | -3.076 | 0.714            | -3.551 | -3.226 | 0.714  | -3.551 | -3.225 |
| H    | 1.131          | 3.056  | -4.057 | 3.360  | -0.092 | -4.456 | -0.705           | -2.369 | -4.359 | -0.705 | -2.370 | -4.359 |
| H    | 0.171          | 4.884  | -0.275 | 4.408  | -3.038 | -1.501 | 2.077            | -4.473 | -1.841 | 2.077  | -4.473 | -1.841 |
| H    | 0.838          | 5.136  | -2.635 | 4.778  | -2.039 | -3.739 | 0.767            | -4.364 | -3.943 | 0.767  | -4.364 | -3.942 |
| C    | -0.477         | 0.948  | 1.259  | 1.354  | -1.504 | 0.959  | 1.760            | -1.368 | 0.972  | 1.709  | -1.290 | 0.927  |
| C    | -0.295         | 2.388  | 0.956  | 2.475  | -2.142 | 0.355  | 2.063            | -2.497 | 0.168  | 2.050  | -2.488 | 0.179  |
| C    | -0.865         | 0.566  | 2.539  | 0.956  | -1.907 | 2.239  | 2.367            | -1.226 | 2.221  | 2.360  | -1.239 | 2.204  |
| C    | -0.542         | 3.312  | 2.037  | 3.126  | -3.157 | 1.057  | 2.965            | -3.439 | 0.664  | 2.962  | -3.431 | 0.661  |
| C    | -1.072         | 1.521  | 3.521  | 1.640  | -2.924 | 2.884  | 3.249            | -2.199 | 2.664  | 3.247  | -2.194 | 2.662  |
| H    | -1.021         | -0.479 | 2.785  | 0.128  | -1.434 | 2.755  | 2.168            | -0.370 | 2.857  | 2.168  | -0.373 | 2.858  |
| C    | -0.912         | 2.905  | 3.279  | 2.728  | -3.571 | 2.316  | 3.567            | -3.316 | 1.905  | 3.564  | -3.316 | 1.906  |
| H    | -1.086         | 3.627  | 4.067  | 3.256  | -4.359 | 2.835  | 4.262            | -4.065 | 2.261  | 4.262  | -4.065 | 2.261  |
| N    | 0.275          | 1.575  | -1.178 | 2.129  | -0.579 | -1.377 | 0.602            | -1.491 | -1.400 | 0.599  | -1.482 | -1.390 |
| F    | -1.437         | 1.149  | 4.756  | 1.244  | -3.307 | 4.105  | 3.822            | -2.067 | 3.867  | 3.822  | -2.068 | 3.866  |
| F    | -0.392         | 4.633  | 1.814  | 4.194  | -3.779 | 0.524  | 3.294            | -4.525 | -0.061 | 3.295  | -4.525 | -0.059 |
| C    | 0.262          | -2.783 | 1.271  | -1.819 | -0.081 | 1.583  | 0.002            | 1.314  | 2.646  | -0.001 | 1.312  | 2.632  |
| C    | -1.897         | -2.369 | 0.461  | -0.911 | 2.070  | 1.373  | 1.055            | 2.693  | 1.063  | 1.057  | 2.687  | 1.061  |
| C    | -0.115         | -3.988 | 1.832  | -2.908 | 0.388  | 2.292  | -0.032           | 2.330  | 3.582  | -0.030 | 2.326  | 3.581  |
| H    | 1.279          | -2.417 | 1.343  | -1.707 | -1.127 | 1.323  | -0.427           | 0.335  | 2.829  | -0.426 | 0.335  | 2.829  |
| C    | -2.333         | -3.580 | 1.010  | -1.987 | 2.596  | 2.090  | 1.053            | 3.751  | 1.975  | 1.054  | 3.750  | 1.973  |
| C    | -1.442         | -4.387 | 1.696  | -2.988 | 1.753  | 2.547  | 0.514            | 3.565  | 3.239  | 0.514  | 3.564  | 3.238  |
| H    | 0.614          | -4.592 | 2.358  | -3.675 | -0.303 | 2.620  | -0.480           | 2.154  | 4.552  | -0.480 | 2.154  | 4.552  |
| H    | -3.365         | -3.874 | 0.890  | -2.037 | 3.659  | 2.267  | 1.459            | 4.707  | 1.682  | 1.459  | 4.707  | 1.682  |
| H    | -1.781         | -5.327 | 2.121  | -3.831 | 2.163  | 3.093  | 0.508            | 4.385  | 3.949  | 0.508  | 4.385  | 3.949  |
| C    | -2.020         | -0.258 | -0.759 | 1.121  | 2.081  | 0.004  | 1.284            | 1.534  | -1.080 | 1.265  | 1.446  | -1.025 |
| C    | -2.721         | 0.703  | -1.488 | 2.231  | 2.718  | -0.550 | 1.686            | 1.487  | -2.420 | 1.676  | 1.501  | -2.404 |
| C    | -2.704         | -1.409 | -0.293 | 0.213  | 2.821  | 0.802  | 1.517            | 2.719  | -0.325 | 1.500  | 2.709  | -0.337 |
| C    | -4.068         | 0.513  | -1.747 | 2.421  | 4.073  | -0.327 | 2.297            | 2.592  | -2.987 | 2.297  | 2.587  | -2.985 |
| H    | -2.237         | 1.599  | -1.860 | 2.954  | 2.181  | -1.155 | 1.534            | 0.605  | -3.030 | 1.534  | 0.606  | -3.030 |
| C    | -4.063         | -1.543 | -0.585 | 0.455  | 4.182  | 0.992  | 2.144            | 3.795  | -0.953 | 2.144  | 3.787  | -0.949 |
| C    | -4.769         | -0.602 | -1.309 | 1.547  | 4.829  | 0.439  | 2.541            | 3.761  | -2.277 | 2.538  | 3.761  | -2.278 |
| H    | -5.822         | -0.733 | -1.521 | 1.708  | 5.886  | 0.607  | 3.026            | 4.612  | -2.736 | 3.026  | 4.612  | -2.736 |
| N    | -0.598         | -1.995 | 0.610  | -0.848 | 0.733  | 1.139  | 0.552            | 1.487  | 1.433  | 0.545  | 1.478  | 1.423  |
| F    | -4.734         | 1.440  | -2.448 | 3.483  | 4.684  | -0.865 | 2.674            | 2.544  | -4.272 | 2.674  | 2.545  | -4.271 |

|    |        |        |        |        |        |        |        |        |        |        |        |        |
|----|--------|--------|--------|--------|--------|--------|--------|--------|--------|--------|--------|--------|
| F  | -4.750 | -2.622 | -0.160 | -0.375 | 4.930  | 1.742  | 2.395  | 4.930  | -0.272 | 2.395  | 4.930  | -0.273 |
| C  | 2.739  | -1.015 | -0.879 | -2.893 | -0.730 | -1.364 | -3.799 | -0.272 | 0.389  | -3.797 | -0.271 | 0.385  |
| C  | 2.764  | 0.200  | 1.095  | -3.401 | -2.864 | -0.738 | -5.152 | -0.814 | 2.139  | -5.153 | -0.815 | 2.139  |
| C  | 4.116  | -1.184 | -0.844 | -4.236 | -0.352 | -1.361 | -4.886 | -0.078 | -0.464 | -4.889 | -0.079 | -0.460 |
| C  | 4.139  | 0.083  | 1.205  | -4.767 | -2.601 | -0.702 | -6.309 | -0.658 | 1.381  | -6.308 | -0.656 | 1.377  |
| C  | 4.817  | -0.624 | 0.214  | -5.176 | -1.312 | -1.023 | -5.230 | -1.105 | 3.184  | -5.230 | -1.105 | 3.184  |
| H  | 4.587  | -1.743 | -1.644 | -4.500 | 0.669  | -1.606 | -6.155 | -0.280 | 0.054  | -6.170 | -0.278 | 0.043  |
| H  | 4.667  | 0.531  | 2.038  | -5.481 | -3.370 | -0.434 | -4.711 | 0.225  | -1.488 | -4.712 | 0.225  | -1.488 |
| N  | 2.083  | -0.340 | 0.076  | -2.474 | -1.961 | -1.057 | -7.290 | -0.822 | 1.812  | -7.290 | -0.822 | 1.811  |
| O  | 0.657  | -1.335 | -1.990 | -0.627 | -0.076 | -1.765 | -3.919 | -0.632 | 1.670  | -3.919 | -0.631 | 1.669  |
| C  | 1.914  | -1.597 | -2.035 | -1.855 | 0.343  | -1.670 | -1.450 | -0.361 | 0.616  | -1.432 | -0.357 | 0.612  |
| O  | 2.517  | -2.232 | -2.887 | -2.229 | 1.499  | -1.799 | -2.409 | -0.052 | -0.183 | -2.397 | -0.051 | -0.178 |
| H  | 2.174  | 0.731  | 1.835  | -3.037 | -3.859 | -0.491 | -2.298 | 0.394  | -1.325 | -2.297 | 0.393  | -1.322 |
| Cl | 6.540  | -0.802 | 0.311  | -6.871 | -0.904 | -0.986 | -7.558 | -0.062 | -0.958 | -7.539 | -0.065 | -0.944 |

**Table S17.** Cartesian coordinates for triplet geometry of complex 14.

| Atom | T <sub>1</sub> |        |        | TS     |        |        | T <sub>1</sub> ' |        |        | MECP   |        |        |
|------|----------------|--------|--------|--------|--------|--------|------------------|--------|--------|--------|--------|--------|
|      | x (Å)          | y (Å)  | z (Å)  | x (Å)  | y (Å)  | z (Å)  | x (Å)            | y (Å)  | z (Å)  | x (Å)  | y (Å)  | z (Å)  |
| Ir   | 0.065          | -0.233 | -0.275 | 0.484  | 0.082  | -0.107 | 0.385            | 0.002  | 0.016  | 0.485  | 0.014  | 0.013  |
| C    | 1.018          | 1.596  | -2.437 | 2.146  | -0.217 | -2.567 | -0.138           | -1.448 | -2.565 | -0.138 | -1.444 | -2.553 |
| C    | 0.552          | 2.644  | -0.342 | 2.591  | -1.792 | -0.882 | 1.293            | -2.566 | -1.076 | 1.291  | -2.562 | -1.073 |
| C    | 1.380          | 2.810  | -3.008 | 3.080  | -0.784 | -3.414 | -0.032           | -2.462 | -3.502 | -0.031 | -2.458 | -3.501 |
| H    | 1.027          | 0.669  | -3.003 | 1.533  | 0.630  | -2.854 | -0.778           | -0.581 | -2.699 | -0.777 | -0.581 | -2.698 |
| C    | 0.921          | 3.913  | -0.917 | 3.550  | -2.398 | -1.697 | 1.436            | -3.612 | -1.989 | 1.437  | -3.610 | -1.986 |
| C    | 1.325          | 3.995  | -2.213 | 3.797  | -1.888 | -2.962 | 0.776            | -3.555 | -3.208 | 0.774  | -3.554 | -3.208 |
| H    | 1.688          | 2.839  | -4.045 | 3.234  | -0.368 | -4.402 | -0.578           | -2.389 | -4.435 | -0.577 | -2.389 | -4.435 |
| H    | 0.863          | 4.796  | -0.296 | 4.081  | -3.266 | -1.336 | 2.053            | -4.460 | -1.734 | 2.053  | -4.460 | -1.735 |
| H    | 1.598          | 4.952  | -2.644 | 4.540  | -2.358 | -3.597 | 0.885            | -4.367 | -3.918 | 0.885  | -4.367 | -3.918 |
| C    | -0.239         | 0.968  | 1.252  | 1.065  | -1.502 | 1.015  | 1.517            | -1.356 | 1.046  | 1.467  | -1.272 | 0.996  |
| C    | 0.104          | 2.376  | 0.943  | 2.162  | -2.216 | 0.453  | 1.885            | -2.483 | 0.266  | 1.869  | -2.473 | 0.276  |
| C    | -0.692         | 0.641  | 2.528  | 0.622  | -1.845 | 2.298  | 2.037            | -1.207 | 2.334  | 2.031  | -1.222 | 2.317  |
| C    | -0.063         | 3.331  | 2.012  | 2.745  | -3.242 | 1.198  | 2.760            | -3.416 | 0.824  | 2.758  | -3.408 | 0.822  |
| C    | -0.814         | 1.621  | 3.497  | 1.239  | -2.875 | 2.986  | 2.896            | -2.171 | 2.837  | 2.894  | -2.165 | 2.835  |
| H    | -0.965         | -0.379 | 2.777  | -0.191 | -1.315 | 2.781  | 1.786            | -0.353 | 2.954  | 1.787  | -0.355 | 2.954  |
| C    | -0.500         | 2.978  | 3.249  | 2.303  | -3.595 | 2.460  | 3.276            | -3.285 | 2.103  | 3.273  | -3.286 | 2.103  |
| H    | -0.610         | 3.721  | 4.028  | 2.778  | -4.394 | 3.014  | 3.953            | -4.026 | 2.506  | 3.953  | -4.026 | 2.506  |
| N    | 0.624          | 1.486  | -1.173 | 1.926  | -0.695 | -1.333 | 0.522            | -1.494 | -1.397 | 0.521  | -1.485 | -1.387 |
| F    | -1.242         | 1.303  | 4.727  | 0.800  | -3.200 | 4.210  | 3.386            | -2.032 | 4.075  | 3.386  | -2.032 | 4.074  |
| F    | 0.233          | 4.626  | 1.783  | 3.789  | -3.936 | 0.705  | 3.148            | -4.499 | 0.125  | 3.149  | -4.499 | 0.127  |
| C    | 0.102          | -2.820 | 1.308  | -2.038 | 0.110  | 1.538  | -0.378           | 1.318  | 2.588  | -0.380 | 1.316  | 2.573  |
| C    | -1.986         | -2.189 | 0.452  | -0.997 | 2.196  | 1.296  | 0.777            | 2.699  | 1.079  | 0.781  | 2.691  | 1.075  |
| C    | -0.411         | -3.973 | 1.871  | -3.103 | 0.659  | 2.226  | -0.482           | 2.337  | 3.516  | -0.480 | 2.332  | 3.515  |
| H    | 1.150          | -2.562 | 1.396  | -1.987 | -0.946 | 1.299  | -0.815           | 0.338  | 2.743  | -0.814 | 0.339  | 2.741  |
| C    | -2.558         | -3.342 | 1.003  | -2.046 | 2.802  | 1.991  | 0.706            | 3.759  | 1.986  | 0.707  | 3.757  | 1.985  |
| C    | -1.770         | -4.232 | 1.712  | -3.101 | 2.031  | 2.454  | 0.081            | 3.573  | 3.209  | 0.081  | 3.573  | 3.208  |
| H    | 0.240          | -4.645 | 2.416  | -3.913 | 0.023  | 2.561  | -0.997           | 2.161  | 4.452  | -0.997 | 2.161  | 4.453  |
| H    | -3.612         | -3.527 | 0.865  | -2.032 | 3.870  | 2.147  | 1.128            | 4.716  | 1.719  | 1.128  | 4.716  | 1.719  |
| H    | -2.214         | -5.125 | 2.138  | -3.921 | 2.503  | 2.985  | 0.022            | 4.394  | 3.915  | 0.022  | 4.394  | 3.915  |
| C    | -1.862         | -0.089 | -0.787 | 1.048  | 2.055  | -0.045 | 1.160            | 1.535  | -1.039 | 1.140  | 1.439  | -0.992 |
| C    | -2.443         | 0.932  | -1.539 | 2.200  | 2.612  | -0.599 | 1.654            | 1.487  | -2.349 | 1.643  | 1.503  | -2.330 |
| C    | -2.672         | -1.157 | -0.326 | 0.177  | 2.866  | 0.725  | 1.335            | 2.723  | -0.274 | 1.314  | 2.715  | -0.283 |
| C    | -3.797         | 0.883  | -1.824 | 2.469  | 3.958  | -0.402 | 2.296            | 2.594  | -2.875 | 2.296  | 2.589  | -2.873 |
| H    | -1.860         | 1.768  | -1.909 | 2.898  | 2.020  | -1.182 | 1.549            | 0.602  | -2.965 | 1.549  | 0.603  | -2.964 |
| C    | -4.032         | -1.150 | -0.644 | 0.498  | 4.213  | 0.889  | 1.997            | 3.802  | -0.860 | 1.997  | 3.792  | -0.857 |
| C    | -4.620         | -0.147 | -1.390 | 1.633  | 4.782  | 0.337  | 2.484            | 3.766  | -2.154 | 2.481  | 3.766  | -2.155 |
| H    | -5.677         | -0.169 | -1.623 | 1.856  | 5.831  | 0.484  | 2.995            | 4.619  | -2.581 | 2.995  | 4.619  | -2.580 |
| N    | -0.658         | -1.952 | 0.624  | -1.014 | 0.853  | 1.090  | 0.255            | 1.491  | 1.417  | 0.247  | 1.477  | 1.410  |
| F    | -4.348         | 1.867  | -2.546 | 3.572  | 4.493  | -0.940 | 2.761            | 2.545  | -4.131 | 2.761  | 2.546  | -4.130 |

|   |        |        |        |        |        |        |        |        |        |        |        |        |
|---|--------|--------|--------|--------|--------|--------|--------|--------|--------|--------|--------|--------|
| F | -4.837 | -2.146 | -0.223 | -0.294 | 5.026  | 1.613  | 2.193  | 4.939  | -0.167 | 2.194  | 4.939  | -0.168 |
| C | 2.796  | -1.341 | -0.804 | -3.039 | -0.753 | -1.437 | -3.999 | -0.293 | 0.102  | -3.996 | -0.292 | 0.099  |
| C | 2.907  | -0.114 | 1.162  | -3.507 | -2.869 | -0.720 | -5.455 | -0.818 | 1.774  | -5.455 | -0.818 | 1.774  |
| C | 4.146  | -1.650 | -0.743 | -4.390 | -0.447 | -1.596 | -5.030 | -0.114 | -0.819 | -5.030 | -0.114 | -0.819 |
| C | 4.261  | -0.368 | 1.301  | -4.880 | -2.683 | -0.851 | -6.565 | -0.676 | 0.946  | -6.565 | -0.676 | 0.946  |
| C | 4.869  | -1.149 | 0.325  | -5.304 | -1.441 | -1.300 | -5.595 | -1.096 | 2.816  | -5.595 | -1.096 | 2.816  |
| H | 4.584  | -2.261 | -1.523 | -4.688 | 0.538  | -1.931 | -6.322 | -0.317 | -0.370 | -6.321 | -0.317 | -0.370 |
| H | 4.828  | 0.025  | 2.135  | -5.592 | -3.465 | -0.615 | -4.807 | 0.176  | -1.838 | -4.807 | 0.176  | -1.838 |
| N | 2.193  | -0.592 | 0.134  | -2.596 | -1.938 | -1.004 | -7.574 | -0.836 | 1.305  | -7.574 | -0.836 | 1.305  |
| O | 0.712  | -1.455 | -1.952 | -0.782 | -0.044 | -1.791 | -4.195 | -0.636 | 1.378  | -4.195 | -0.636 | 1.378  |
| C | 1.936  | -1.847 | -1.970 | -2.022 | 0.345  | -1.726 | -1.668 | -0.377 | 0.474  | -1.650 | -0.370 | 0.464  |
| O | 2.484  | -2.550 | -2.805 | -2.422 | 1.488  | -1.885 | -2.576 | -0.074 | -0.384 | -2.569 | -0.075 | -0.369 |
| H | 2.360  | 0.481  | 1.886  | -3.123 | -3.823 | -0.366 | -2.394 | 0.366  | -1.520 | -2.387 | 0.365  | -1.518 |
| F | 6.168  | -1.416 | 0.428  | -6.611 | -1.204 | -1.437 | -7.349 | -0.163 | -1.211 | -7.349 | -0.163 | -1.211 |

**Table S18.** Cartesian coordinates for triplet geometry of complex 15.

| Atom | T <sub>1</sub> |        |        | TS     |        |        | T <sub>1</sub> ' |        |        | MECP   |        |        |
|------|----------------|--------|--------|--------|--------|--------|------------------|--------|--------|--------|--------|--------|
|      | x (Å)          | y (Å)  | z (Å)  | x (Å)  | y (Å)  | z (Å)  | x (Å)            | y (Å)  | z (Å)  | x (Å)  | y (Å)  | z (Å)  |
| Ir   | -0.242         | -0.276 | -0.145 | -0.691 | 0.141  | -0.076 | 0.666            | 0.037  | -0.075 | -1.017 | 0.013  | -0.015 |
| C    | 1.328          | 1.341  | -2.135 | -0.279 | 1.167  | -2.853 | -1.041           | 0.925  | 2.243  | -0.078 | -1.442 | 2.455  |
| C    | 0.211          | 2.581  | -0.476 | 0.075  | 2.753  | -1.162 | -0.468           | 2.623  | 0.730  | -1.653 | -2.579 | 1.149  |
| C    | 1.883          | 2.484  | -2.683 | 0.053  | 2.072  | -3.844 | -1.778           | 1.800  | 3.021  | -0.057 | -2.461 | 3.406  |
| H    | 1.524          | 0.355  | -2.540 | -0.538 | 0.137  | -3.069 | -0.980           | -0.137 | 2.454  | 0.561  | -0.570 | 2.530  |
| C    | 0.744          | 3.762  | -0.995 | 0.411  | 3.710  | -2.123 | -1.198           | 3.545  | 1.480  | -1.677 | -3.629 | 2.069  |
| C    | 1.582          | 3.709  | -2.099 | 0.393  | 3.368  | -3.466 | -1.851           | 3.131  | 2.632  | -0.874 | -3.567 | 3.204  |
| H    | 2.537          | 2.402  | -3.542 | 0.047  | 1.762  | -4.881 | -2.293           | 1.430  | 3.899  | 0.594  | -2.386 | 4.269  |
| H    | 0.504          | 4.705  | -0.529 | 0.694  | 4.703  | -1.809 | -1.255           | 4.572  | 1.151  | -2.305 | -4.489 | 1.888  |
| H    | 2.001          | 4.626  | -2.501 | 0.655  | 4.108  | -4.215 | -2.423           | 3.846  | 3.213  | -0.889 | -4.385 | 3.919  |
| C    | -1.045         | 1.131  | 1.060  | -0.152 | 1.741  | 1.056  | 0.850            | 1.767  | -1.156 | -2.092 | -1.281 | -0.877 |
| C    | -0.671         | 2.449  | 0.694  | 0.105  | 2.914  | 0.295  | 0.258            | 2.889  | -0.521 | -2.388 | -2.492 | -0.120 |
| C    | -1.858         | 0.927  | 2.173  | -0.128 | 1.816  | 2.452  | 1.568            | 1.942  | -2.341 | -2.814 | -1.241 | -2.121 |
| C    | -1.152         | 3.509  | 1.464  | 0.381  | 4.102  | 0.973  | 0.407            | 4.141  | -1.119 | -3.325 | -3.439 | -0.560 |
| C    | -2.294         | 2.020  | 2.906  | 0.158  | 3.022  | 3.068  | 1.678            | 3.210  | -2.890 | -3.719 | -2.192 | -2.536 |
| H    | -2.160         | -0.066 | 2.483  | -0.331 | 0.950  | 3.072  | 2.047            | 1.110  | -2.845 | -2.659 | -0.367 | -2.778 |
| C    | -1.959         | 3.323  | 2.573  | 0.418  | 4.184  | 2.353  | 1.107            | 4.327  | -2.300 | -3.992 | -3.321 | -1.769 |
| H    | -2.313         | 4.167  | 3.150  | 0.631  | 5.121  | 2.850  | 1.205            | 5.313  | -2.736 | -4.705 | -4.070 | -2.091 |
| N    | 0.517          | 1.398  | -1.068 | -0.292 | 1.506  | -1.555 | -0.394           | 1.329  | 1.139  | -0.871 | -1.491 | 1.377  |
| F    | -3.072         | 1.819  | 3.975  | 0.192  | 3.083  | 4.406  | 2.359            | 3.375  | -4.031 | -4.358 | -2.064 | -3.707 |
| F    | -0.837         | 4.778  | 1.152  | 0.624  | 5.238  | 0.291  | -0.131           | 5.240  | -0.558 | -3.615 | -4.538 | 0.172  |
| C    | -0.499         | -2.527 | 1.808  | -0.178 | -1.592 | 2.333  | 1.346            | -1.511 | -2.541 | -0.487 | 1.323  | -2.660 |
| C    | -2.367         | -2.197 | 0.419  | -2.260 | -1.921 | 1.307  | 2.771            | -1.894 | -0.716 | -1.470 | 2.685  | -1.028 |
| C    | -1.107         | -3.584 | 2.458  | -0.424 | -2.585 | 3.264  | 2.037            | -2.409 | -3.333 | -0.515 | 2.339  | -3.606 |
| H    | 0.502          | -2.189 | 2.047  | 0.759  | -1.042 | 2.298  | 0.466            | -0.984 | -2.889 | -0.070 | 0.349  | -2.882 |
| C    | -3.027         | -3.256 | 1.050  | -2.559 | -2.929 | 2.224  | 3.508            | -2.806 | -1.475 | -1.517 | 3.752  | -1.939 |
| C    | -2.395         | -3.945 | 2.071  | -1.638 | -3.259 | 3.207  | 3.142            | -3.058 | -2.788 | -1.045 | 3.575  | -3.231 |
| H    | -0.578         | -4.110 | 3.243  | 0.329  | -2.825 | 4.004  | 1.710            | -2.594 | -4.349 | -0.115 | 2.173  | -4.601 |
| H    | -4.021         | -3.528 | 0.728  | -3.501 | -3.451 | 2.152  | 4.348            | -3.314 | -1.027 | -1.913 | 4.707  | -1.623 |
| H    | -2.904         | -4.769 | 2.560  | -1.866 | -4.047 | 3.917  | 3.710            | -3.768 | -3.380 | -1.081 | 4.397  | -3.938 |
| C    | -1.981         | -0.369 | -1.149 | -2.535 | -0.506 | -0.676 | 1.997            | -0.678 | 1.262  | -1.562 | 1.426  | 1.069  |
| C    | -2.372         | 0.454  | -2.205 | -3.288 | -0.009 | -1.742 | 2.124            | -0.298 | 2.603  | -1.898 | 1.490  | 2.452  |
| C    | -2.865         | -1.376 | -0.684 | -3.107 | -1.470 | 0.195  | 2.973            | -1.543 | 0.691  | -1.830 | 2.706  | 0.383  |
| C    | -3.614         | 0.267  | -2.789 | -4.576 | -0.479 | -1.945 | 3.186            | -0.776 | 3.350  | -2.491 | 2.568  | 3.075  |
| H    | -1.726         | 1.239  | -2.582 | -2.895 | 0.742  | -2.418 | 1.411            | 0.367  | 3.076  | -1.718 | 0.589  | 3.070  |
| C    | -4.105         | -1.516 | -1.310 | -4.408 | -1.902 | -0.058 | 4.023            | -1.987 | 1.494  | -2.451 | 3.774  | 1.039  |
| C    | -4.502         | -0.710 | -2.361 | -5.161 | -1.427 | -1.119 | 4.152            | -1.623 | 2.823  | -2.774 | 3.743  | 2.386  |
| H    | -5.469         | -0.842 | -2.829 | -6.169 | -1.781 | -1.287 | 4.979            | -1.983 | 3.421  | -3.240 | 4.591  | 2.872  |
| N    | -1.120         | -1.850 | 0.831  | -1.075 | -1.260 | 1.392  | 1.717            | -1.247 | -1.279 | -0.967 | 1.475  | -1.429 |
| F    | -3.984         | 1.056  | -3.803 | -5.291 | -0.006 | -2.974 | 3.298            | -0.415 | 4.635  | -2.799 | 2.519  | 4.378  |



|   |        |        |        |        |        |        |        |        |        |        |        |        |
|---|--------|--------|--------|--------|--------|--------|--------|--------|--------|--------|--------|--------|
| F | -4.973 | -2.458 | -0.900 | -4.999 | -2.810 | 0.740  | 4.972  | -2.799 | 0.991  | -2.741 | 4.919  | 0.381  |
| C | 2.663  | -0.773 | 0.152  | 2.843  | -1.129 | 0.187  | -3.169 | -1.998 | -0.563 | 3.428  | -0.249 | -0.612 |
| C | 1.918  | 0.412  | 2.075  | 3.636  | 0.375  | 1.734  | -4.298 | -3.491 | -1.874 | 4.700  | -0.792 | -2.431 |
| C | 4.020  | -0.540 | 0.558  | 4.128  | -1.327 | -0.332 | -4.361 | -1.360 | -0.192 | 4.562  | -0.040 | 0.175  |
| C | 3.199  | 0.600  | 2.532  | 4.941  | 0.255  | 1.276  | -5.532 | -2.935 | -1.562 | 5.890  | -0.618 | -1.732 |
| H | 1.061  | 0.796  | 2.622  | 3.391  | 1.041  | 2.558  | -4.233 | -4.345 | -2.546 | 4.723  | -1.087 | -3.478 |
| C | 4.272  | 0.124  | 1.726  | 5.187  | -0.618 | 0.223  | -5.559 | -1.840 | -0.707 | 5.810  | -0.232 | -0.398 |
| H | 3.381  | 1.121  | 3.463  | 5.741  | 0.829  | 1.729  | -6.444 | -3.341 | -1.982 | 4.434  | 0.274  | 1.204  |
| N | 1.635  | -0.239 | 0.937  | 2.612  | -0.295 | 1.205  | -3.137 | -3.036 | -1.398 | 6.847  | -0.771 | -2.216 |
| O | 0.862  | -1.668 | -1.059 | 0.828  | -1.016 | -1.020 | -1.105 | -0.916 | -0.849 | 3.492  | -0.617 | -1.896 |
| C | 2.228  | -1.503 | -1.009 | 1.598  | -1.826 | -0.353 | -1.830 | -1.558 | -0.004 | 1.058  | -0.342 | -0.712 |
| O | 2.899  | -1.953 | -1.929 | 1.416  | -3.005 | -0.123 | -1.552 | -1.831 | 1.159  | 2.062  | -0.041 | 0.002  |
| H | 5.296  | 0.293  | 2.033  | 6.188  | -0.745 | -0.172 | -6.495 | -1.359 | -0.446 | 2.001  | 0.407  | 1.170  |
| C | 5.188  | -0.998 | -0.280 | 4.376  | -2.300 | -1.456 | -4.357 | -0.170 | 0.732  | 7.058  | -0.074 | 0.431  |
| F | 6.363  | -0.667 | 0.304  | 5.580  | -2.086 | -2.023 | -5.554 | 0.446  | 0.743  | 6.926  | 0.896  | 1.347  |
| F | 5.196  | -0.420 | -1.490 | 3.457  | -2.186 | -2.425 | -3.448 | 0.746  | 0.351  | 7.346  | -1.209 | 1.091  |
| F | 5.213  | -2.325 | -0.446 | 4.363  | -3.568 | -1.030 | -4.076 | -0.502 | 2.000  | 8.126  | 0.225  | -0.328 |

**Table S19.** Cartesian coordinates for triplet geometry of complex 16.

| Atom | T <sub>1</sub> |        |        | TS     |        |        | T <sub>1</sub> ' |        |        | MECP   |        |        |
|------|----------------|--------|--------|--------|--------|--------|------------------|--------|--------|--------|--------|--------|
|      | x (Å)          | y (Å)  | z (Å)  | x (Å)  | y (Å)  | z (Å)  | x (Å)            | y (Å)  | z (Å)  | x (Å)  | y (Å)  | z (Å)  |
| Ir   | -0.184         | -0.181 | -0.300 | 0.377  | -0.140 | -0.296 | -0.713           | 0.001  | -0.027 | -0.974 | 0.068  | 0.029  |
| C    | 0.310          | 1.791  | -2.500 | 0.722  | -2.416 | -2.217 | 0.071            | -1.399 | 2.517  | -0.020 | -1.374 | 2.382  |
| C    | -0.213         | 2.731  | -0.408 | 1.985  | -2.572 | -0.238 | -1.458           | -2.570 | 1.175  | -1.392 | -2.541 | 1.066  |
| C    | 0.416          | 3.037  | -3.090 | 1.242  | -3.602 | -2.701 | 0.075            | -2.402 | 3.471  | 0.080  | -2.368 | 3.435  |
| H    | 0.450          | 0.864  | -3.045 | -0.014 | -1.829 | -2.754 | 0.697            | -0.515 | 2.586  | 0.722  | -0.528 | 2.542  |
| C    | -0.114         | 4.013  | -0.958 | 2.538  | -3.776 | -0.682 | -1.492           | -3.608 | 2.108  | -1.511 | -3.564 | 2.068  |
| C    | 0.201          | 4.163  | -2.299 | 2.166  | -4.287 | -1.917 | -0.728           | -3.518 | 3.262  | -0.723 | -3.515 | 3.261  |
| H    | 0.656          | 3.116  | -4.143 | 0.926  | -3.975 | -3.667 | 0.699            | -2.304 | 4.350  | 0.694  | -2.307 | 4.355  |
| H    | -0.293         | 4.875  | -0.332 | 3.251  | -4.295 | -0.060 | -2.109           | -4.473 | 1.919  | -2.110 | -4.473 | 1.926  |
| H    | 0.273          | 5.157  | -2.728 | 2.598  | -5.219 | -2.265 | -0.752           | -4.324 | 3.988  | -0.752 | -4.326 | 3.985  |
| C    | -0.651         | 0.986  | 1.245  | 1.592  | -0.636 | 1.200  | -1.907           | -1.393 | -0.931 | -1.771 | -0.794 | -0.570 |
| C    | -0.562         | 2.379  | 0.970  | 2.259  | -1.878 | 1.021  | -2.173           | -2.519 | -0.109 | -2.043 | -2.205 | -0.140 |
| C    | -0.992         | 0.578  | 2.538  | 1.803  | 0.084  | 2.379  | -2.549           | -1.272 | -2.165 | -2.262 | -1.278 | -1.923 |
| C    | -0.812         | 3.288  | 2.001  | 3.091  | -2.344 | 2.041  | -3.073           | -3.478 | -0.573 | -2.991 | -3.379 | -0.558 |
| C    | -1.230         | 1.527  | 3.519  | 2.640  | -0.433 | 3.353  | -3.428           | -2.261 | -2.575 | -3.382 | -2.274 | -2.518 |
| H    | -1.083         | -0.472 | 2.793  | 1.332  | 1.044  | 2.550  | -2.380           | -0.419 | -2.814 | -2.374 | -0.449 | -2.818 |
| C    | -1.145         | 2.893  | 3.283  | 3.300  | -1.647 | 3.216  | -3.709           | -3.376 | -1.798 | -3.704 | -3.374 | -1.822 |
| H    | -1.334         | 3.619  | 4.062  | 3.950  | -2.034 | 3.989  | -4.403           | -4.137 | -2.129 | -4.403 | -4.143 | -2.125 |
| N    | 0.010          | 1.649  | -1.200 | 1.091  | -1.917 | -1.027 | -0.688           | -1.476 | 1.413  | -0.808 | -1.313 | 1.299  |
| F    | -1.552         | 1.121  | 4.754  | 2.833  | 0.264  | 4.480  | -4.035           | -2.148 | -3.763 | -4.031 | -2.133 | -3.717 |
| F    | -0.727         | 4.613  | 1.775  | 3.730  | -3.522 | 1.908  | -3.367           | -4.562 | 0.171  | -3.360 | -4.545 | 0.127  |
| C    | 0.377          | -2.696 | 1.283  | -1.369 | 1.779  | 1.234  | -0.238           | 1.285  | -2.684 | -0.263 | 1.384  | -2.571 |
| C    | -1.819         | -2.465 | 0.502  | 0.545  | 2.720  | 0.258  | -1.245           | 2.678  | -1.083 | -1.301 | 2.501  | -0.952 |
| C    | 0.105          | -3.917 | 1.868  | -1.764 | 2.996  | 1.756  | -0.240           | 2.291  | -3.633 | -0.239 | 2.218  | -3.625 |
| H    | 1.363          | -2.251 | 1.335  | -1.935 | 0.868  | 1.391  | 0.188            | 0.306  | -2.872 | 0.187  | 0.294  | -2.824 |
| C    | -2.149         | -3.699 | 1.074  | 0.187  | 3.976  | 0.755  | -1.278           | 3.725  | -2.007 | -1.247 | 3.699  | -1.984 |
| C    | -1.187         | -4.424 | 1.756  | -0.972 | 4.112  | 1.501  | -0.780           | 3.527  | -3.285 | -0.804 | 3.543  | -3.254 |
| H    | 0.887          | -4.452 | 2.391  | -2.673 | 3.062  | 2.341  | 0.176            | 2.106  | -4.615 | 0.174  | 2.114  | -4.619 |
| H    | -3.155         | -4.074 | 0.975  | 0.822  | 4.826  | 0.555  | -1.681           | 4.682  | -1.711 | -1.680 | 4.682  | -1.722 |
| H    | -1.444         | -5.381 | 2.198  | -1.253 | 5.086  | 1.887  | -0.803           | 4.339  | -4.005 | -0.801 | 4.340  | -4.002 |
| C    | -2.130         | -0.376 | -0.715 | 1.895  | 1.002  | -0.820 | -1.401           | 1.542  | 1.079  | -1.271 | 0.859  | 1.005  |
| C    | -2.929         | 0.530  | -1.416 | 3.026  | 0.576  | -1.520 | -1.764           | 1.507  | 2.431  | -1.733 | 1.560  | 2.088  |
| C    | -2.714         | -1.576 | -0.237 | 1.744  | 2.376  | -0.500 | -1.664           | 2.716  | 0.319  | -1.582 | 2.478  | 0.264  |
| C    | -4.263         | 0.237  | -1.640 | 3.968  | 1.512  | -1.910 | -2.364           | 2.615  | 3.004  | -2.307 | 2.613  | 2.989  |
| H    | -2.533         | 1.465  | -1.795 | 3.186  | -0.466 | -1.768 | -1.589           | 0.632  | 3.046  | -1.563 | 0.651  | 3.030  |
| C    | -4.067         | -1.817 | -0.495 | 2.732  | 3.267  | -0.926 | -2.278           | 3.797  | 0.952  | -2.194 | 3.741  | 0.972  |
| C    | -4.864         | -0.931 | -1.193 | 3.850  | 2.867  | -1.631 | -2.635           | 3.774  | 2.289  | -2.653 | 3.777  | 2.290  |
| H    | -5.908         | -1.144 | -1.378 | 4.598  | 3.581  | -1.948 | -3.110           | 4.629  | 2.752  | -3.112 | 4.632  | 2.749  |
| N    | -0.551         | -1.987 | 0.621  | -0.255 | 1.647  | 0.498  | -0.747           | 1.469  | -1.456 | -0.721 | 1.127  | -1.542 |
| F    | -5.017         | 1.115  | -2.316 | 5.047  | 1.099  | -2.585 | -2.703           | 2.579  | 4.298  | -2.696 | 2.577  | 4.250  |

|   |        |        |        |        |        |        |        |        |        |        |        |        |
|---|--------|--------|--------|--------|--------|--------|--------|--------|--------|--------|--------|--------|
| F | -4.654 | -2.949 | -0.058 | 2.616  | 4.579  | -0.652 | -2.554 | 4.922  | 0.267  | -2.549 | 4.890  | 0.306  |
| C | 2.651  | -0.836 | -0.946 | -3.511 | -0.366 | -0.505 | 3.658  | -0.244 | -0.492 | 3.543  | -0.244 | -0.468 |
| C | 2.638  | 0.399  | 1.022  | -4.012 | -1.552 | 1.388  | 4.977  | -0.790 | -2.278 | 4.984  | -0.785 | -2.260 |
| C | 4.032  | -0.941 | -0.926 | -4.851 | -0.091 | -0.757 | 4.765  | -0.048 | 0.336  | 4.799  | -0.043 | 0.347  |
| C | 4.015  | 0.349  | 1.123  | -5.378 | -1.368 | 1.225  | 6.151  | -0.632 | -1.549 | 6.164  | -0.639 | -1.575 |
| C | 4.712  | -0.342 | 0.129  | -5.788 | -0.613 | 0.127  | 5.025  | -1.083 | -3.324 | 5.026  | -1.084 | -3.328 |
| H | 4.524  | -1.485 | -1.724 | -5.127 | 0.520  | -1.607 | 6.011  | -0.254 | -0.223 | 5.984  | -0.250 | -0.211 |
| H | 4.535  | 0.819  | 1.948  | -6.096 | -1.775 | 1.926  | 4.632  | 0.256  | 1.366  | 4.632  | 0.255  | 1.364  |
| N | 1.972  | -0.183 | 0.013  | -3.089 | -1.077 | 0.548  | 7.129  | -0.791 | -1.983 | 7.127  | -0.791 | -1.983 |
| O | 0.575  | -1.268 | -2.030 | -1.329 | -0.420 | -1.442 | 3.757  | -0.606 | -1.773 | 3.769  | -0.613 | -1.795 |
| C | 1.843  | -1.462 | -2.092 | -2.465 | 0.206  | -1.457 | 1.305  | -0.342 | -0.669 | 0.870  | -0.252 | -0.534 |
| O | 2.472  | -2.057 | -2.953 | -2.772 | 1.149  | -2.165 | 2.278  | -0.024 | 0.107  | 2.369  | -0.079 | -0.228 |
| H | 2.030  | 0.909  | 1.762  | -3.640 | -2.113 | 2.242  | 2.197  | 0.429  | 1.248  | 1.956  | 0.496  | 1.463  |
| N | 6.115  | -0.371 | 0.166  | -7.163 | -0.431 | -0.116 | 7.218  | -0.070 | 0.604  | 7.195  | -0.074 | 0.586  |
| O | 6.787  | -0.075 | 1.234  | -8.060 | -0.625 | 0.801  | 8.298  | -0.248 | 0.064  | 8.309  | -0.246 | 0.070  |
| O | 6.810  | -1.220 | -0.530 | -7.609 | 0.500  | -0.906 | 7.058  | 0.247  | 1.769  | 7.067  | 0.250  | 1.780  |

**Table S20.** Cartesian coordinates for triplet geometry of complex 17.

| Atom | T <sub>1</sub> |        |        | TS     |        |        | T <sub>1</sub> ' |        |        | MECP   |        |        |
|------|----------------|--------|--------|--------|--------|--------|------------------|--------|--------|--------|--------|--------|
|      | x (Å)          | y (Å)  | z (Å)  | x (Å)  | y (Å)  | z (Å)  | x (Å)            | y (Å)  | z (Å)  | x (Å)  | y (Å)  | z (Å)  |
| Ir   | -0.245         | -0.120 | -0.421 | 0.805  | 0.069  | -0.101 | 0.714            | -0.001 | 0.026  | 0.881  | -0.084 | -0.375 |
| C    | -0.309         | 1.953  | -2.582 | 2.404  | -0.088 | -2.614 | -0.079           | -1.436 | -2.494 | 0.064  | -1.437 | -2.429 |
| C    | -0.605         | 2.779  | -0.402 | 2.935  | -1.716 | -1.006 | 1.460            | -2.586 | -1.143 | 1.397  | -2.476 | -1.036 |
| C    | -0.414         | 3.221  | -3.125 | 3.328  | -0.598 | -3.508 | -0.082           | -2.452 | -3.435 | -0.081 | -2.430 | -3.420 |
| H    | -0.131         | 1.065  | -3.177 | 1.763  | 0.753  | -2.849 | -0.708           | -0.555 | -2.570 | -0.726 | -0.562 | -2.493 |
| C    | -0.715         | 4.079  | -0.901 | 3.885  | -2.266 | -1.871 | 1.494            | -3.635 | -2.063 | 1.493  | -3.584 | -2.028 |
| C    | -0.621         | 4.296  | -2.267 | 4.084  | -1.700 | -3.121 | 0.725            | -3.562 | -3.215 | 0.729  | -3.557 | -3.218 |
| H    | -0.328         | 3.354  | -4.196 | 3.443  | -0.140 | -4.483 | -0.711           | -2.366 | -4.313 | -0.710 | -2.372 | -4.312 |
| H    | -0.870         | 4.899  | -0.217 | 4.447  | -3.134 | -1.560 | 2.113            | -4.496 | -1.865 | 2.114  | -4.495 | -1.874 |
| H    | -0.706         | 5.304  | -2.659 | 4.819  | -2.127 | -3.795 | 0.749            | -4.377 | -3.931 | 0.746  | -4.379 | -3.927 |
| C    | -0.536         | 0.975  | 1.236  | 1.458  | -1.541 | 0.943  | 1.909            | -1.383 | 0.948  | 1.623  | -0.536 | 0.503  |
| C    | -0.683         | 2.361  | 0.999  | 2.557  | -2.203 | 0.323  | 2.177            | -2.517 | 0.138  | 2.116  | -2.271 | 0.085  |
| C    | -0.572         | 0.480  | 2.538  | 1.065  | -1.942 | 2.225  | 2.550            | -1.246 | 2.181  | 2.277  | -1.319 | 1.997  |
| C    | -0.876         | 3.201  | 2.096  | 3.189  | -3.239 | 1.011  | 3.080            | -3.469 | 0.613  | 2.999  | -3.371 | 0.641  |
| C    | -0.776         | 1.362  | 3.587  | 1.729  | -2.980 | 2.856  | 3.432            | -2.229 | 2.602  | 3.369  | -2.235 | 2.528  |
| H    | -0.447         | -0.575 | 2.751  | 0.255  | -1.452 | 2.754  | 2.378            | -0.387 | 2.820  | 2.375  | -0.385 | 2.805  |
| C    | -0.928         | 2.728  | 3.395  | 2.795  | -3.651 | 2.271  | 3.716            | -3.351 | 1.837  | 3.721  | -3.361 | 1.851  |
| H    | -1.079         | 3.404  | 4.227  | 3.307  | -4.457 | 2.780  | 4.412            | -4.107 | 2.176  | 4.415  | -4.111 | 2.169  |
| N    | -0.408         | 1.746  | -1.261 | 2.232  | -0.620 | -1.394 | 0.686            | -1.497 | -1.392 | 0.784  | -0.902 | -1.122 |
| F    | -0.823         | 0.890  | 4.836  | 1.337  | -3.361 | 4.079  | 4.039            | -2.102 | 3.789  | 4.032  | -2.087 | 3.744  |
| F    | -1.021         | 4.525  | 1.921  | 4.235  | -3.885 | 0.462  | 3.376            | -4.560 | -0.118 | 3.370  | -4.549 | -0.079 |
| C    | 0.914          | -2.586 | 0.903  | -1.671 | -0.043 | 1.611  | 0.229            | 1.328  | 2.659  | 0.292  | 1.364  | 2.476  |
| C    | -1.399         | -2.643 | 0.500  | -0.718 | 2.087  | 1.396  | 1.266            | 2.685  | 1.047  | 1.230  | 2.611  | 1.110  |
| C    | 0.901          | -3.862 | 1.439  | -2.746 | 0.449  | 2.326  | 0.237            | 2.346  | 3.593  | 0.234  | 2.367  | 3.587  |
| H    | 1.825          | -2.005 | 0.823  | -1.583 | -1.091 | 1.351  | -0.213           | 0.357  | 2.855  | -0.214 | 0.346  | 2.836  |
| C    | -1.465         | -3.930 | 1.032  | -1.779 | 2.637  | 2.118  | 1.306            | 3.745  | 1.957  | 1.254  | 3.693  | 1.869  |
| C    | -0.310         | -4.540 | 1.501  | -2.796 | 1.816  | 2.580  | 0.796            | 3.570  | 3.234  | 0.773  | 3.526  | 3.265  |
| H    | 1.824          | -4.303 | 1.793  | -3.524 | -0.226 | 2.659  | -0.190           | 2.180  | 4.575  | -0.182 | 2.189  | 4.579  |
| H    | -2.414         | -4.442 | 1.072  | -1.806 | 3.701  | 2.294  | 1.723            | 4.692  | 1.651  | 1.725  | 4.689  | 1.652  |
| H    | -0.360         | -5.542 | 1.913  | -3.628 | 2.244  | 3.129  | 0.824            | 4.391  | 3.942  | 0.828  | 4.391  | 3.942  |
| C    | -2.205         | -0.563 | -0.526 | 1.306  | 2.056  | 0.015  | 1.420            | 1.518  | -1.098 | 1.168  | 0.498  | -0.838 |
| C    | -3.220         | 0.255  | -1.025 | 2.427  | 2.669  | -0.544 | 1.786            | 1.461  | -2.448 | 1.766  | 1.355  | -2.143 |
| C    | -2.522         | -1.854 | -0.031 | 0.420  | 2.814  | 0.820  | 1.693            | 2.700  | -0.353 | 1.646  | 2.293  | -0.286 |
| C    | -4.523         | -0.216 | -1.049 | 2.649  | 4.018  | -0.317 | 2.400            | 2.554  | -3.034 | 2.369  | 2.605  | -2.946 |
| H    | -3.015         | 1.250  | -1.401 | 3.134  | 2.118  | -1.155 | 1.602            | 0.580  | -3.052 | 1.586  | 0.593  | -3.059 |
| C    | -3.851         | -2.272 | -0.077 | 0.694  | 4.168  | 1.013  | 2.321            | 3.764  | -0.999 | 2.200  | 3.612  | -0.975 |
| C    | -4.866         | -1.476 | -0.581 | 1.797  | 4.792  | 0.456  | 2.682            | 3.720  | -2.333 | 2.690  | 3.711  | -2.383 |
| H    | -5.888         | -1.830 | -0.604 | 1.985  | 5.845  | 0.626  | 3.169            | 4.562  | -2.807 | 3.172  | 4.568  | -2.803 |
| N    | -0.202         | -1.999 | 0.449  | -0.685 | 0.749  | 1.160  | 0.751            | 1.488  | 1.433  | 0.934  | 1.347  | 1.501  |
| F    | -5.493         | 0.565  | -1.535 | 3.723  | 4.607  | -0.860 | 2.742            | 2.498  | -4.327 | 2.734  | 2.492  | -4.300 |

|   |        |        |        |        |        |        |        |        |        |        |        |        |
|---|--------|--------|--------|--------|--------|--------|--------|--------|--------|--------|--------|--------|
| F | -4.207 | -3.486 | 0.377  | -0.114 | 4.933  | 1.771  | 2.608  | 4.896  | -0.328 | 2.600  | 4.870  | -0.361 |
| C | 2.606  | -0.548 | -1.144 | -2.790 | -0.609 | -1.327 | -3.648 | -0.214 | 0.505  | -3.478 | -0.241 | 0.458  |
| C | 2.577  | 0.678  | 0.867  | -3.347 | -2.750 | -0.745 | -4.960 | -0.694 | 2.311  | -4.983 | -0.680 | 2.282  |
| C | 3.967  | -0.711 | -1.060 | -4.120 | -0.197 | -1.266 | -4.759 | -0.052 | -0.321 | -4.813 | -0.052 | -0.328 |
| C | 3.928  | 0.558  | 1.000  | -4.700 | -2.442 | -0.658 | -6.133 | -0.565 | 1.574  | -6.146 | -0.574 | 1.621  |
| H | 1.989  | 1.212  | 1.605  | -3.002 | -3.761 | -0.540 | -5.006 | -0.947 | 3.368  | -5.007 | -0.949 | 3.372  |
| C | 4.685  | -0.171 | 0.019  | -5.092 | -1.130 | -0.925 | -6.024 | -0.236 | 0.224  | -5.990 | -0.223 | 0.202  |
| H | 4.478  | -1.261 | -1.843 | -4.374 | 0.836  | -1.471 | -4.626 | 0.214  | -1.363 | -4.625 | 0.211  | -1.360 |
| H | 4.427  | 1.015  | 1.845  | -5.427 | -3.198 | -0.387 | -7.101 | -0.715 | 2.037  | -7.099 | -0.718 | 2.037  |
| N | 1.876  | 0.135  | -0.173 | -2.405 | -1.863 | -1.068 | -3.740 | -0.528 | 1.801  | -3.746 | -0.534 | 1.824  |
| O | 0.515  | -0.799 | -2.175 | -0.508 | -0.024 | -1.753 | -1.295 | -0.335 | 0.677  | -0.820 | -0.255 | 0.721  |
| C | 1.821  | -1.105 | -2.261 | -1.723 | 0.432  | -1.636 | -2.269 | -0.014 | -0.099 | -2.355 | -0.073 | 0.151  |
| O | 2.271  | -1.750 | -3.187 | -2.058 | 1.601  | -1.744 | -2.178 | 0.426  | -1.245 | -1.898 | 0.534  | -1.489 |
| C | 6.120  | -0.364 | 0.089  | -6.515 | -0.688 | -0.846 | -7.215 | -0.072 | -0.659 | -7.173 | -0.076 | -0.636 |
| O | 6.802  | -0.978 | -0.716 | -6.893 | 0.443  | -1.035 | -7.165 | 0.195  | -1.837 | -7.182 | 0.199  | -1.854 |
| O | 6.687  | 0.217  | 1.183  | -7.355 | -1.691 | -0.532 | -8.377 | -0.255 | -0.007 | -8.398 | -0.255 | -0.010 |
| H | 7.628  | 0.018  | 1.106  | -8.241 | -1.305 | -0.511 | -9.077 | -0.129 | -0.662 | -9.072 | -0.129 | -0.662 |

**Table S21.** Cartesian coordinates for triplet geometry of complex 18.

| Atom | T <sub>1</sub> |        |        | TS     |        |        | T <sub>1</sub> ' |        |        | MECP   |        |        |
|------|----------------|--------|--------|--------|--------|--------|------------------|--------|--------|--------|--------|--------|
|      | x (Å)          | y (Å)  | z (Å)  | x (Å)  | y (Å)  | z (Å)  | x (Å)            | y (Å)  | z (Å)  | x (Å)  | y (Å)  | z (Å)  |
| Ir   | 0.034          | -0.387 | -0.302 | 0.246  | 0.238  | -0.112 | 0.211            | 0.004  | 0.011  | 0.311  | 0.018  | 0.014  |
| C    | 1.915          | 0.730  | -2.357 | 1.885  | 1.248  | -2.390 | -0.095           | -1.435 | -2.612 | -0.096 | -1.431 | -2.599 |
| C    | 1.756          | 1.954  | -0.356 | 3.097  | 0.097  | -0.740 | 1.257            | -2.530 | -1.036 | 1.254  | -2.527 | -1.032 |
| C    | 2.877          | 1.587  | -2.861 | 3.018  | 1.445  | -3.157 | 0.100            | -2.437 | -3.546 | 0.100  | -2.435 | -3.545 |
| H    | 1.554          | -0.129 | -2.912 | 0.901  | 1.580  | -2.702 | -0.744           | -0.582 | -2.785 | -0.744 | -0.582 | -2.784 |
| C    | 2.722          | 2.848  | -0.819 | 4.272  | 0.274  | -1.475 | 1.487            | -3.566 | -1.943 | 1.489  | -3.562 | -1.941 |
| C    | 3.282          | 2.660  | -2.075 | 4.231  | 0.954  | -2.682 | 0.911            | -3.514 | -3.204 | 0.909  | -3.513 | -3.204 |
| H    | 3.296          | 1.407  | -3.843 | 2.944  | 1.967  | -4.103 | -0.382           | -2.370 | -4.514 | -0.382 | -2.370 | -4.514 |
| H    | 3.031          | 3.672  | -0.194 | 5.200  | -0.131 | -1.099 | 2.106            | -4.401 | -1.652 | 2.106  | -4.401 | -1.653 |
| H    | 4.037          | 3.351  | -2.435 | 5.142  | 1.091  | -3.255 | 1.088            | -4.317 | -3.911 | 1.088  | -4.318 | -3.911 |
| C    | 0.175          | 0.924  | 1.217  | 1.604  | -0.776 | 0.997  | 1.308            | -1.332 | 1.105  | 1.259  | -1.248 | 1.053  |
| C    | 1.079          | 1.982  | 0.948  | 2.939  | -0.629 | 0.522  | 1.755            | -2.444 | 0.344  | 1.738  | -2.434 | 0.352  |
| C    | -0.479         | 0.858  | 2.444  | 1.389  | -1.437 | 2.213  | 1.738            | -1.181 | 2.425  | 1.735  | -1.197 | 2.407  |
| C    | 1.265          | 2.951  | 1.935  | 3.982  | -1.162 | 1.280  | 2.615            | -3.359 | 0.953  | 2.612  | -3.351 | 0.950  |
| C    | -0.245         | 1.844  | 3.389  | 2.465  | -1.948 | 2.918  | 2.587            | -2.127 | 2.977  | 2.585  | -2.121 | 2.975  |
| H    | -1.167         | 0.054  | 2.680  | 0.396  | -1.549 | 2.634  | 1.427            | -0.338 | 3.032  | 1.428  | -0.340 | 3.032  |
| C    | 0.620          | 2.904  | 3.159  | 3.775  | -1.830 | 2.474  | 3.042            | -3.226 | 2.263  | 3.039  | -3.227 | 2.263  |
| H    | 0.789          | 3.669  | 3.905  | 4.605  | -2.231 | 3.040  | 3.709            | -3.953 | 2.706  | 3.710  | -3.953 | 2.705  |
| N    | 1.374          | 0.918  | -1.146 | 1.930  | 0.613  | -1.209 | 0.483            | -1.474 | -1.402 | 0.483  | -1.466 | -1.392 |
| F    | -0.874         | 1.783  | 4.566  | 2.245  | -2.586 | 4.075  | 2.990            | -1.985 | 4.246  | 2.991  | -1.986 | 4.245  |
| F    | 2.098          | 3.985  | 1.729  | 5.258  | -1.038 | 0.869  | 3.075            | -4.427 | 0.274  | 3.076  | -4.426 | 0.276  |
| C    | -0.967         | -2.690 | 1.323  | -1.859 | -1.424 | 1.265  | -0.747           | 1.273  | 2.541  | -0.749 | 1.272  | 2.526  |
| C    | -2.641         | -1.322 | 0.399  | -2.307 | 0.875  | 1.197  | 0.448            | 2.704  | 1.112  | 0.453  | 2.696  | 1.109  |
| C    | -1.904         | -3.520 | 1.911  | -3.082 | -1.703 | 1.845  | -0.943           | 2.281  | 3.467  | -0.940 | 2.276  | 3.466  |
| H    | 0.102          | -2.849 | 1.410  | -1.151 | -2.205 | 1.012  | -1.157           | 0.277  | 2.665  | -1.156 | 0.278  | 2.664  |
| C    | -3.626         | -2.127 | 0.977  | -3.553 | 0.650  | 1.787  | 0.285            | 3.755  | 2.019  | 0.286  | 3.752  | 2.018  |
| C    | -3.252         | -3.226 | 1.736  | -3.941 | -0.641 | 2.108  | -0.406           | 3.538  | 3.201  | -0.406 | 3.538  | 3.200  |
| H    | -1.576         | -4.376 | 2.489  | -3.350 | -2.727 | 2.070  | -1.506           | 2.080  | 4.370  | -1.506 | 2.080  | 4.370  |
| H    | -4.667         | -1.889 | 0.821  | -4.210 | 1.486  | 1.974  | 0.690            | 4.727  | 1.783  | 0.690  | 4.727  | 1.783  |
| H    | -4.014         | -3.854 | 2.184  | -4.914 | -0.817 | 2.554  | -0.536           | 4.352  | 3.906  | -0.536 | 4.352  | 3.906  |
| C    | -1.665         | 0.482  | -0.928 | -0.519 | 2.134  | 0.093  | 1.002            | 1.570  | -0.984 | 0.983  | 1.471  | -0.940 |
| C    | -1.766         | 1.609  | -1.746 | 0.086  | 3.325  | -0.306 | 1.580            | 1.548  | -2.259 | 1.568  | 1.564  | -2.240 |
| C    | -2.844         | -0.145 | -0.448 | -1.755 | 2.170  | 0.783  | 1.088            | 2.757  | -0.203 | 1.067  | 2.749  | -0.213 |
| C    | -3.019         | 2.090  | -2.088 | -0.542 | 4.531  | -0.036 | 2.216            | 2.679  | -2.739 | 2.216  | 2.674  | -2.737 |
| H    | -0.885         | 2.118  | -2.122 | 1.039  | 3.336  | -0.825 | 1.544            | 0.664  | -2.885 | 1.544  | 0.665  | -2.884 |
| C    | -4.078         | 0.386  | -0.823 | -2.341 | 3.413  | 1.026  | 1.749            | 3.862  | -0.740 | 1.748  | 3.852  | -0.737 |
| C    | -4.192         | 1.498  | -1.639 | -1.758 | 4.603  | 0.627  | 2.318            | 3.852  | -2.001 | 2.315  | 3.851  | -2.002 |
| H    | -5.163         | 1.888  | -1.914 | -2.236 | 5.552  | 0.833  | 2.825            | 4.725  | -2.390 | 2.825  | 4.725  | -2.390 |
| N    | -1.332         | -1.620 | 0.603  | -1.481 | -0.175 | 0.950  | -0.052           | 1.476  | 1.411  | -0.059 | 1.463  | 1.404  |
| F    | -3.115         | 3.166  | -2.875 | 0.037  | 5.673  | -0.426 | 2.761            | 2.655  | -3.962 | 2.761  | 2.655  | -3.961 |

|   |        |        |        |        |        |        |        |        |        |        |        |        |
|---|--------|--------|--------|--------|--------|--------|--------|--------|--------|--------|--------|--------|
| F | -5.222 | -0.174 | -0.393 | -3.515 | 3.505  | 1.679  | 1.861  | 5.000  | -0.030 | 1.862  | 5.000  | -0.032 |
| C | 2.355  | -2.206 | -0.532 | -1.988 | -2.350 | -1.797 | -4.155 | -0.417 | -0.226 | -4.151 | -0.416 | -0.229 |
| C | 2.605  | -1.099 | 1.506  | -1.151 | -4.393 | -1.290 | -5.745 | -1.003 | 1.273  | -5.745 | -1.002 | 1.272  |
| C | 3.647  | -2.704 | -0.375 | -3.265 | -2.910 | -1.904 | -5.142 | -0.270 | -1.205 | -5.143 | -0.270 | -1.205 |
| C | 3.857  | -1.630 | 1.613  | -2.425 | -4.946 | -1.396 | -6.725 | -0.863 | 0.293  | -6.725 | -0.863 | 0.294  |
| H | 4.038  | -3.340 | -1.167 | -4.108 | -2.273 | -2.151 | -4.861 | 0.039  | -2.207 | -4.861 | 0.039  | -2.207 |
| H | 4.464  | -1.403 | 2.485  | -2.587 | -6.007 | -1.226 | -7.771 | -1.052 | 0.522  | -7.771 | -1.052 | 0.522  |
| N | 1.793  | -1.380 | 0.444  | -0.925 | -3.095 | -1.486 | -4.455 | -0.783 | 1.021  | -4.455 | -0.783 | 1.021  |
| O | 0.310  | -1.903 | -1.617 | -0.598 | -0.411 | -1.939 | -1.862 | -0.433 | 0.324  | -1.844 | -0.424 | 0.313  |
| C | 1.535  | -2.471 | -1.708 | -1.823 | -0.850 | -1.978 | -2.711 | -0.145 | -0.597 | -2.706 | -0.147 | -0.578 |
| O | 1.867  | -3.116 | -2.688 | -2.822 | -0.168 | -2.144 | -2.461 | 0.318  | -1.710 | -2.451 | 0.317  | -1.708 |
| H | 2.200  | -0.443 | 2.270  | -0.294 | -5.012 | -1.036 | -6.009 | -1.299 | 2.285  | -6.009 | -1.299 | 2.285  |
| N | 4.428  | -2.456 | 0.666  | -3.493 | -4.207 | -1.703 | -6.432 | -0.495 | -0.955 | -6.431 | -0.495 | -0.955 |

**Table S22.** Cartesian coordinates for triplet geometry of complex 19.

| Atom | T <sub>1</sub> |        |        | TS     |        |        | T <sub>1</sub> ' |        |        | MECP   |        |        |
|------|----------------|--------|--------|--------|--------|--------|------------------|--------|--------|--------|--------|--------|
|      | x (Å)          | y (Å)  | z (Å)  | x (Å)  | y (Å)  | z (Å)  | x (Å)            | y (Å)  | z (Å)  | x (Å)  | y (Å)  | z (Å)  |
| Ir   | -0.174         | -0.135 | -0.235 | 0.889  | -0.004 | -0.109 | 0.822            | -0.003 | 0.010  | 0.922  | 0.007  | 0.011  |
| C    | 0.246          | 1.782  | -2.491 | 2.373  | -0.631 | -2.620 | 0.295            | -1.380 | -2.609 | 0.296  | -1.376 | -2.596 |
| C    | -0.643         | 2.726  | -0.528 | 2.514  | -2.283 | -0.956 | 1.635            | -2.591 | -1.107 | 1.631  | -2.588 | -1.104 |
| C    | 0.223          | 3.000  | -3.146 | 3.136  | -1.379 | -3.498 | 0.378            | -2.381 | -3.562 | 0.378  | -2.378 | -3.560 |
| H    | 0.589          | 0.863  | -2.953 | 1.952  | 0.332  | -2.884 | -0.299           | -0.481 | -2.740 | -0.300 | -0.482 | -2.739 |
| C    | -0.682         | 3.980  | -1.146 | 3.294  | -3.075 | -1.803 | 1.751            | -3.627 | -2.036 | 1.753  | -3.624 | -2.033 |
| C    | -0.249         | 4.113  | -2.456 | 3.609  | -2.617 | -3.073 | 1.126            | -3.516 | -3.269 | 1.124  | -3.515 | -3.269 |
| H    | 0.564          | 3.066  | -4.172 | 3.347  | -0.997 | -4.489 | -0.140           | -2.265 | -4.506 | -0.140 | -2.266 | -4.506 |
| H    | -1.059         | 4.831  | -0.598 | 3.633  | -4.041 | -1.463 | 2.321            | -4.508 | -1.782 | 2.321  | -4.508 | -1.782 |
| H    | -0.284         | 5.084  | -2.938 | 4.212  | -3.232 | -3.733 | 1.214            | -4.319 | -3.992 | 1.214  | -4.320 | -3.992 |
| C    | -0.978         | 1.015  | 1.184  | 1.140  | -1.693 | 0.987  | 1.860            | -1.432 | 1.044  | 1.814  | -1.342 | 0.993  |
| C    | -1.082         | 2.389  | 0.829  | 2.041  | -2.620 | 0.389  | 2.195            | -2.561 | 0.252  | 2.177  | -2.550 | 0.261  |
| C    | -1.388         | 0.621  | 2.462  | 0.666  | -1.948 | 2.279  | 2.350            | -1.333 | 2.347  | 2.344  | -1.349 | 2.330  |
| C    | -1.583         | 3.293  | 1.768  | 2.407  | -3.757 | 1.110  | 3.010            | -3.544 | 0.813  | 3.008  | -3.537 | 0.811  |
| C    | -1.878         | 1.564  | 3.350  | 1.062  | -3.097 | 2.942  | 3.149            | -2.346 | 2.853  | 3.147  | -2.339 | 2.852  |
| H    | -1.336         | -0.416 | 2.776  | -0.001 | -1.262 | 2.788  | 2.123            | -0.480 | 2.977  | 2.123  | -0.482 | 2.977  |
| C    | -1.986         | 2.912  | 3.034  | 1.931  | -4.023 | 2.381  | 3.496            | -3.463 | 2.107  | 3.493  | -3.463 | 2.107  |
| H    | -2.373         | 3.635  | 3.740  | 2.235  | -4.913 | 2.916  | 4.126            | -4.243 | 2.513  | 4.126  | -4.243 | 2.513  |
| N    | -0.171         | 1.657  | -1.222 | 2.092  | -1.062 | -1.381 | 0.923            | -1.478 | -1.426 | 0.924  | -1.471 | -1.416 |
| F    | -2.264         | 1.172  | 4.572  | 0.594  | -3.335 | 4.175  | 3.611            | -2.254 | 4.107  | 3.611  | -2.255 | 4.106  |
| F    | -1.686         | 4.603  | 1.465  | 3.262  | -4.655 | 0.584  | 3.365            | -4.632 | 0.103  | 3.366  | -4.632 | 0.105  |
| C    | 0.612          | -2.460 | 1.526  | -1.521 | 0.547  | 1.604  | 0.048            | 1.307  | 2.580  | 0.047  | 1.306  | 2.566  |
| C    | -1.512         | -2.611 | 0.548  | -0.059 | 2.362  | 1.351  | 1.328            | 2.648  | 1.137  | 1.333  | 2.640  | 1.133  |
| C    | 0.476          | -3.684 | 2.152  | -2.423 | 1.304  | 2.328  | -0.028           | 2.313  | 3.526  | -0.026 | 2.307  | 3.525  |
| H    | 1.508          | -1.863 | 1.635  | -1.709 | -0.490 | 1.352  | -0.450           | 0.352  | 2.700  | -0.449 | 0.352  | 2.698  |
| C    | -1.700         | -3.857 | 1.158  | -0.932 | 3.170  | 2.083  | 1.288            | 3.694  | 2.064  | 1.288  | 3.691  | 2.062  |
| C    | -0.707         | -4.391 | 1.959  | -2.116 | 2.639  | 2.570  | 0.614            | 3.520  | 3.262  | 0.614  | 3.520  | 3.262  |
| H    | 1.280          | -4.067 | 2.768  | -3.344 | 0.854  | 2.676  | -0.583           | 2.149  | 4.442  | -0.583 | 2.149  | 4.442  |
| H    | -2.624         | -4.390 | 0.993  | -0.682 | 4.206  | 2.248  | 1.772            | 4.630  | 1.830  | 1.772  | 4.630  | 1.830  |
| H    | -0.854         | -5.358 | 2.430  | -2.800 | 3.269  | 3.129  | 0.579            | 4.330  | 3.983  | 0.579  | 4.330  | 3.983  |
| C    | -2.020         | -0.654 | -0.815 | 1.864  | 1.799  | -0.058 | 1.711            | 1.504  | -0.991 | 1.686  | 1.405  | -0.948 |
| C    | -2.877         | 0.079  | -1.639 | 3.092  | 2.103  | -0.648 | 2.240            | 1.453  | -2.286 | 2.230  | 1.469  | -2.266 |
| C    | -2.458         | -1.909 | -0.318 | 1.214  | 2.770  | 0.745  | 1.928            | 2.666  | -0.197 | 1.906  | 2.661  | -0.206 |
| C    | -4.123         | -0.431 | -1.962 | 3.649  | 3.357  | -0.454 | 2.959            | 2.531  | -2.772 | 2.959  | 2.526  | -2.770 |
| H    | -2.594         | 1.045  | -2.040 | 3.626  | 1.383  | -1.257 | 2.104            | 0.586  | -2.923 | 2.104  | 0.588  | -2.922 |
| C    | -3.727         | -2.372 | -0.678 | 1.823  | 4.014  | 0.904  | 2.667            | 3.716  | -0.741 | 2.666  | 3.706  | -0.739 |
| C    | -4.579         | -1.657 | -1.497 | 3.035  | 4.333  | 0.317  | 3.190            | 3.677  | -2.021 | 3.188  | 3.677  | -2.023 |
| H    | -5.556         | -2.040 | -1.760 | 3.483  | 5.307  | 0.462  | 3.761            | 4.508  | -2.416 | 3.761  | 4.508  | -2.415 |
| N    | -0.349         | -1.934 | 0.751  | -0.371 | 1.057  | 1.136  | 0.728            | 1.466  | 1.434  | 0.719  | 1.451  | 1.427  |
| F    | -4.934         | 0.283  | -2.755 | 4.824  | 3.649  | -1.027 | 3.458            | 2.480  | -4.014 | 3.458  | 2.480  | -4.013 |



|   |        |        |        |        |        |        |        |        |        |        |        |        |
|---|--------|--------|--------|--------|--------|--------|--------|--------|--------|--------|--------|--------|
| F | -4.175 | -3.560 | -0.226 | 1.248  | 4.970  | 1.659  | 2.905  | 4.828  | -0.020 | 2.906  | 4.828  | -0.022 |
| C | 2.800  | -0.496 | -0.565 | -2.805 | 0.127  | -1.319 | -3.561 | -0.075 | -0.036 | -3.557 | -0.075 | -0.039 |
| C | 2.325  | 0.965  | 1.234  | -3.832 | -1.785 | -0.594 | -5.056 | -0.611 | 1.605  | -5.056 | -0.611 | 1.605  |
| C | 4.203  | -0.436 | -0.296 | -3.991 | 0.815  | -1.394 | -4.551 | 0.191  | -0.948 | -4.551 | 0.191  | -0.948 |
| C | 3.706  | 1.126  | 1.531  | -5.121 | -1.187 | -0.636 | -6.172 | -0.374 | 0.756  | -6.172 | -0.374 | 0.757  |
| H | 4.006  | 1.776  | 2.345  | -3.743 | -2.822 | -0.269 | -5.238 | -0.928 | 2.633  | -5.238 | -0.928 | 2.633  |
| N | 1.885  | 0.200  | 0.277  | -5.201 | 0.166  | -1.053 | -5.907 | 0.045  | -0.571 | -5.906 | 0.045  | -0.571 |
| O | 0.882  | -1.153 | -1.807 | -3.974 | 1.854  | -1.705 | -4.273 | 0.515  | -1.945 | -4.273 | 0.515  | -1.945 |
| C | 2.169  | -1.236 | -1.718 | -2.721 | -1.172 | -0.917 | -3.807 | -0.474 | 1.243  | -3.807 | -0.473 | 1.242  |
| O | 2.882  | -1.849 | -2.512 | -0.450 | 0.111  | -1.729 | -1.252 | -0.291 | 0.408  | -1.233 | -0.283 | 0.397  |
| H | 1.572  | 1.478  | 1.828  | -1.516 | 0.860  | -1.643 | -2.119 | 0.086  | -0.468 | -2.113 | 0.083  | -0.450 |
| C | 4.665  | 0.408  | 0.781  | -1.543 | 2.071  | -1.805 | -1.867 | 0.550  | -1.582 | -1.858 | 0.549  | -1.580 |
| C | 5.161  | -1.146 | -1.023 | -6.301 | -1.883 | -0.275 | -7.512 | -0.538 | 1.187  | -7.512 | -0.538 | 1.187  |
| C | 6.554  | -1.032 | -0.720 | -6.229 | -2.920 | 0.041  | -7.704 | -0.860 | 2.207  | -7.704 | -0.860 | 2.207  |
| C | 6.988  | -0.231 | 0.295  | -6.471 | 0.797  | -1.099 | -6.997 | 0.294  | -1.445 | -6.997 | 0.294  | -1.445 |
| C | 6.030  | 0.499  | 1.054  | -6.533 | 1.833  | -1.420 | -6.794 | 0.616  | -2.462 | -6.794 | 0.616  | -2.462 |
| H | 4.815  | -1.780 | -1.830 | -7.599 | 0.103  | -0.745 | -8.285 | 0.128  | -1.005 | -8.285 | 0.129  | -1.005 |
| H | 7.261  | -1.598 | -1.318 | -8.569 | 0.589  | -0.782 | -9.116 | 0.320  | -1.676 | -9.116 | 0.320  | -1.676 |
| H | 8.043  | -0.139 | 0.530  | -7.516 | -1.249 | -0.329 | -8.547 | -0.291 | 0.323  | -8.547 | -0.291 | 0.323  |
| H | 6.361  | 1.146  | 1.862  | -8.422 | -1.780 | -0.054 | -9.574 | -0.416 | 0.651  | -9.574 | -0.416 | 0.651  |

**Table S23.** Cartesian coordinates for triplet geometry of complex 20.

| Atom | T <sub>1</sub> |        |        | TS     |        |        | T <sub>1</sub> ' |        |        | MECP   |        |        |
|------|----------------|--------|--------|--------|--------|--------|------------------|--------|--------|--------|--------|--------|
|      | x (Å)          | y (Å)  | z (Å)  | x (Å)  | y (Å)  | z (Å)  | x (Å)            | y (Å)  | z (Å)  | x (Å)  | y (Å)  | z (Å)  |
| Ir   | 0.218          | -0.239 | -0.248 | -0.442 | 0.209  | -0.115 | 0.345            | 0.003  | -0.036 | 0.445  | 0.008  | -0.015 |
| C    | 1.268          | 1.480  | -2.453 | -1.202 | 1.947  | -2.425 | 0.368            | -1.385 | -2.702 | 0.366  | -1.382 | -2.691 |
| C    | 0.554          | 2.652  | -0.499 | -0.065 | 3.056  | -0.698 | 1.363            | -2.592 | -0.950 | 1.362  | -2.587 | -0.948 |
| C    | 1.610          | 2.668  | -3.087 | -1.265 | 3.096  | -3.192 | 0.646            | -2.388 | -3.614 | 0.646  | -2.384 | -3.612 |
| H    | 1.375          | 0.516  | -2.939 | -1.594 | 0.997  | -2.767 | -0.187           | -0.487 | -2.956 | -0.187 | -0.487 | -2.955 |
| C    | 0.894          | 3.895  | -1.144 | -0.107 | 4.245  | -1.429 | 1.670            | -3.630 | -1.832 | 1.670  | -3.628 | -1.830 |
| C    | 1.410          | 3.904  | -2.402 | -0.714 | 4.264  | -2.675 | 1.315            | -3.522 | -3.169 | 1.315  | -3.522 | -3.168 |
| H    | 2.011          | 2.637  | -4.093 | -1.730 | 3.066  | -4.169 | 0.335            | -2.275 | -4.645 | 0.335  | -2.275 | -4.645 |
| H    | 0.723          | 4.817  | -0.606 | 0.345  | 5.136  | -1.021 | 2.174            | -4.511 | -1.463 | 2.173  | -4.511 | -1.463 |
| H    | 1.661          | 4.841  | -2.886 | -0.746 | 5.187  | -3.246 | 1.552            | -4.328 | -3.856 | 1.552  | -4.328 | -3.856 |
| C    | -0.260         | 1.052  | 1.161  | 0.608  | 1.497  | 1.070  | 1.137            | -1.427 | 1.197  | 1.105  | -1.347 | 1.141  |
| C    | 0.015          | 2.455  | 0.765  | 0.583  | 2.838  | 0.600  | 1.627            | -2.559 | 0.495  | 1.611  | -2.549 | 0.502  |
| C    | -0.846         | 0.800  | 2.400  | 1.204  | 1.221  | 2.304  | 1.343            | -1.325 | 2.574  | 1.340  | -1.337 | 2.555  |
| C    | -0.302         | 3.475  | 1.733  | 1.168  | 3.832  | 1.385  | 2.303            | -3.543 | 1.217  | 2.301  | -3.535 | 1.214  |
| C    | -1.122         | 1.842  | 3.268  | 1.774  | 2.249  | 3.036  | 2.014            | -2.339 | 3.238  | 2.013  | -2.333 | 3.236  |
| H    | -1.084         | -0.213 | 2.707  | 1.227  | 0.218  | 2.715  | 0.990            | -0.470 | 3.140  | 0.990  | -0.472 | 3.140  |
| C    | -0.847         | 3.192  | 2.944  | 1.773  | 3.566  | 2.601  | 2.506            | -3.459 | 2.584  | 2.504  | -3.459 | 2.585  |
| H    | -1.073         | 3.984  | 3.647  | 2.217  | 4.360  | 3.187  | 3.035            | -4.239 | 3.116  | 3.035  | -4.239 | 3.115  |
| N    | 0.766          | 1.441  | -1.223 | -0.641 | 1.935  | -1.207 | 0.736            | -1.479 | -1.414 | 0.729  | -1.469 | -1.405 |
| F    | -1.663         | 1.595  | 4.469  | 2.353  | 1.973  | 4.213  | 2.202            | -2.245 | 4.561  | 2.202  | -2.246 | 4.561  |
| F    | -0.047         | 4.765  | 1.431  | 1.161  | 5.117  | 0.981  | 2.796            | -4.634 | 0.600  | 2.796  | -4.634 | 0.602  |
| C    | 0.260          | -2.698 | 1.529  | 0.993  | -2.007 | 1.312  | -0.953           | 1.338  | 2.300  | -0.951 | 1.337  | 2.286  |
| C    | -1.798         | -2.210 | 0.521  | -1.330 | -2.286 | 1.145  | 0.640            | 2.649  | 1.173  | 0.641  | 2.643  | 1.171  |
| C    | -0.245         | -3.825 | 2.149  | 1.148  | -3.234 | 1.930  | -1.211           | 2.348  | 3.208  | -1.209 | 2.343  | 3.208  |
| H    | 1.292          | -2.394 | 1.652  | 1.836  | -1.372 | 1.062  | -1.488           | 0.396  | 2.302  | -1.487 | 0.396  | 2.301  |
| C    | -2.360         | -3.341 | 1.124  | -1.228 | -3.530 | 1.772  | 0.422            | 3.697  | 2.071  | 0.423  | 3.695  | 2.070  |
| C    | -1.582         | -4.148 | 1.937  | 0.014  | -4.003 | 2.165  | -0.500           | 3.540  | 3.094  | -0.501 | 3.540  | 3.094  |
| H    | 0.397          | -4.430 | 2.778  | 2.139  | -3.574 | 2.204  | -1.956           | 2.199  | 3.980  | -1.956 | 2.199  | 3.980  |
| H    | -3.398         | -3.574 | 0.946  | -2.119 | -4.118 | 1.930  | 0.965            | 4.622  | 1.950  | 0.965  | 4.622  | 1.950  |
| H    | -2.018         | -5.025 | 2.402  | 0.095  | -4.973 | 2.644  | -0.674           | 4.352  | 3.793  | -0.674 | 4.352  | 3.793  |
| C    | -1.689         | -0.179 | -0.830 | -2.378 | -0.432 | -0.065 | 1.447            | 1.492  | -0.826 | 1.407  | 1.402  | -0.781 |
| C    | -2.266         | 0.779  | -1.663 | -3.500 | 0.246  | -0.548 | 2.239            | 1.429  | -1.980 | 2.224  | 1.443  | -1.967 |
| C    | -2.480         | -1.252 | -0.349 | -2.552 | -1.651 | 0.642  | 1.512            | 2.651  | -0.001 | 1.498  | 2.643  | -0.017 |
| C    | -3.601         | 0.661  | -2.011 | -4.762 | -0.290 | -0.347 | 3.064            | 2.493  | -2.299 | 3.063  | 2.488  | -2.297 |
| H    | -1.694         | 1.614  | -2.050 | -3.414 | 1.189  | -1.075 | 2.224            | 0.565  | -2.634 | 2.224  | 0.567  | -2.633 |
| C    | -3.821         | -1.315 | -0.736 | -3.847 | -2.140 | 0.814  | 2.371            | 3.686  | -0.373 | 2.369  | 3.678  | -0.370 |
| C    | -4.407         | -0.377 | -1.563 | -4.965 | -1.484 | 0.329  | 3.153            | 3.635  | -1.513 | 3.150  | 3.635  | -1.514 |
| H    | -5.448         | -0.453 | -1.846 | -5.957 | -1.889 | 0.481  | 3.810            | 4.454  | -1.775 | 3.810  | 4.454  | -1.774 |
| N    | -0.490         | -1.914 | 0.740  | -0.211 | -1.543 | 0.943  | -0.034           | 1.479  | 1.331  | -0.037 | 1.470  | 1.319  |
| F    | -4.149         | 1.583  | -2.811 | -5.833 | 0.361  | -0.819 | 3.814            | 2.431  | -3.407 | 3.814  | 2.432  | -3.406 |

|   |        |        |        |        |        |        |        |        |        |        |        |        |
|---|--------|--------|--------|--------|--------|--------|--------|--------|--------|--------|--------|--------|
| F | -4.608 | -2.319 | -0.303 | -4.063 | -3.290 | 1.481  | 2.472  | 4.794  | 0.386  | 2.473  | 4.794  | 0.385  |
| C | 2.861  | -1.620 | -0.731 | 2.537  | -1.950 | -1.703 | -3.954 | -0.027 | -0.915 | -3.950 | -0.027 | -0.918 |
| C | 3.254  | -0.213 | 1.080  | 4.514  | -1.273 | -0.742 | -5.752 | -0.391 | 0.462  | -5.752 | -0.391 | 0.462  |
| C | 4.144  | -2.145 | -0.669 | 3.136  | -3.054 | -2.306 | -4.767 | 0.162  | -2.032 | -4.767 | 0.162  | -2.032 |
| C | 4.554  | -0.707 | 1.190  | 5.202  | -2.338 | -1.330 | -6.643 | -0.227 | -0.602 | -6.643 | -0.227 | -0.602 |
| C | 5.005  | -1.685 | 0.314  | 4.500  | -3.239 | -2.123 | -6.141 | 0.054  | -1.867 | -6.140 | 0.054  | -1.866 |
| H | 4.413  | -2.895 | -1.403 | 2.527  | -3.735 | -2.887 | -4.306 | 0.389  | -2.985 | -4.306 | 0.389  | -2.985 |
| H | 5.202  | -0.312 | 1.964  | 6.267  | -2.457 | -1.159 | -7.712 | -0.318 | -0.434 | -7.712 | -0.318 | -0.434 |
| H | 6.015  | -2.074 | 0.397  | 3.205  | -1.084 | -0.936 | -4.428 | -0.294 | 0.303  | -4.428 | -0.294 | 0.302  |
| N | 2.417  | -0.686 | 0.133  | 0.661  | -0.494 | -1.762 | -1.765 | -0.272 | -0.063 | -1.745 | -0.269 | -0.061 |
| O | 0.770  | -1.536 | -1.874 | 1.041  | -1.738 | -1.857 | -2.451 | 0.088  | -1.093 | -2.441 | 0.088  | -1.085 |
| C | 1.921  | -2.106 | -1.838 | 0.317  | -2.700 | -2.060 | -1.999 | 0.504  | -2.159 | -1.999 | 0.503  | -2.157 |
| O | 2.343  | -2.959 | -2.604 | 5.011  | -4.079 | -2.583 | -6.812 | 0.189  | -2.709 | -6.812 | 0.189  | -2.709 |
| C | 2.771  | 0.864  | 2.004  | 5.211  | -0.261 | 0.129  | -6.234 | -0.682 | 1.859  | -6.234 | -0.682 | 1.859  |
| H | 2.491  | 1.753  | 1.432  | 5.416  | 0.649  | -0.443 | -5.748 | -1.583 | 2.244  | -5.748 | -1.583 | 2.244  |
| H | 1.883  | 0.545  | 2.555  | 4.566  | 0.023  | 0.964  | -5.967 | 0.142  | 2.529  | -5.967 | 0.142  | 2.529  |
| H | 3.551  | 1.139  | 2.715  | 6.159  | -0.641 | 0.516  | -7.317 | -0.821 | 1.895  | -7.317 | -0.821 | 1.895  |

## References

1. Frisch, M. J.; Trucks, G. W.; Schlegel, H. B.; Scuseria, G. E.; Robb, M. A.; Cheeseman, J. R.; Scalmani, G.; Barone, V.; Petersson, G. A.; Nakatsuji, H.; Li, X.; Caricato, M. et al. Gaussian 16, Revision C.01; Gaussian, Inc.: Wallingford, CT, **2019**.
2. Becke, A. D. Density-functional thermochemistry. III. The role of exact exchange. *J. Chem. Phys.* **1993**, *98*, 5648–5652.
3. Becke, A. D. Density-functional exchange-energy approximation with correct asymptotic behavior. *Phys. Rev. A* **1998**, *38*, 3098–3100.
4. Lee, C.; Yang, W.; Parr, R. G. Development of the Colle-Salvetti correlation-energy formula into a functional of the electron density. *Phys. Rev. B: Condens. Matter Mater. Phys.* **1988**, *37*, 785–789.
5. Zhao, Y.; Truhlar, D. G. The M06 suite of density functionals for main group thermochemistry, thermochemical kinetics, noncovalent interactions, excited states, and transition elements: two new functionals and systematic testing of four M06-class functionals and 12 other functionals. *Theor. Chem. Acc.* **2008**, *120*, 215–241.
6. Adamo, C.; Barone, V. Toward reliable density functional methods without adjustable parameters: The PBE0 model. *J. Chem. Phys.* **1999**, *110*, 6158–6170.
7. Chai, J. D.; Head-Gordon, M. Long-range corrected hybrid density functionals with damped atom–atom dispersion corrections. *Phys. Chem. Chem. Phys.* **2008**, *10*, 6615–6620.
8. Li, H. F.; Winget, P.; Risko, C.; Sears, J. S.; Brédas, J-L. Tuning the electronic and photophysical properties of heteroleptic iridium(III) phosphorescent emitters through ancillary ligand substitution: a theoretical perspective. *Phys. Chem. Chem. Phys.* **2013**, *15*, 6293–6302.
9. Zhang, Q.; Wang, L.; Wang, X.; Li, Y.; Zhang, J. Tuning the color and phosphorescent properties of iridium(III) complexes with phosphine-silanolate ancillary ligand: A theoretical investigation. *Organ. Electron.* **2016**, *28*, 100–110.
10. Tanaka, H.; Shizu, K.; Nakanotani, H.; Adachi, C. Twisted intramolecular charge transfer state for long-wavelength thermally activated delayed fluorescence. *Chem. Mater.* **2013**, *25*, 3766–3771.
11. Gu, X.; Fei, T.; Zhang, H.; Xu, H.; Yang, B.; Ma, Y.; Liu, X. Theoretical studies of blue-emitting iridium complexes with different ancillary ligands. *J. Phys. Chem. A* **2008**, *112*, 8387–8393.

12. Hay, P. J.; Wadt, W. R. Ab initio effective core potentials for molecular calculations. Potentials for the transition metal atoms Sc to Hg. *J. Chem. Phys.* **1985**, *82*, 270–283.
13. Hay, P. J.; Wadt, W. R. Ab initio effective core potentials for molecular calculations. Potentials for K to Au including the outermost core orbitals. *J. Chem. Phys.* **1985**, *82*, 299–310.
14. Dunning, T. H. Gaussian basis sets for use in correlated molecular calculations. I. The atoms boron through neon and hydrogen. *J. Chem. Phys.* **1989**, *90*, 1007–1023.
15. Kendall, R. A.; Dunning, Jr. T. H.; Harrison, R. J. Electron affinities of the first - row atoms revisited. Systematic basis sets and wave functions. *J. Chem. Phys.* **1992**, *96*, 6796–6806.
16. Barone, V.; Cossi, M. Quantum calculation of molecular energies and energy gradients in solution by a conductor solvent model. *J. Phys. Chem. A.* **1998**, *102*, 1995–2001.
17. Penconi, M.; Cazzaniga, M.; Panzeri, W.; Mele, A.; Cargnoni, F.; Ceresoli, D.; Bossi, A. Unraveling the degradation mechanism in FIrpic-based blue OLEDs: II. Trap and detect molecules at the Interfaces. *Chem. Mater.* **2019**, *31*, 2277–2285.
18. Sajoto, T.; Djurovich, P.; Tamayo, A. Temperature dependence of blue phosphorescent cyclometalated Ir(III) complexes. *J. Am. Chem. Soc.* **2009**, *131*, 9813-9822.
19. Xu, M. L.; Che, G. B.; Li, X. Y.; Xiao, Q. Bis[3,5-difluoro-2-(2-pyridyl)phenyl](picolinato)iridium(III). *Acta Cryst.* **2009**, *E65*, M28.
20. Grimme, S.; Antony, J.; Ehrlich, S.; Krieg, H. A consistent and accurate ab initio parametrization of density functional dispersion correction (DFT-D) for the 94 elements H-Pu. *J. Chem. Phys.* **2010**, *132*, 154104(1–19).
21. Johnson, E. R.; Becke, A. D. A post-Hartree–Fock model of intermolecular interactions. *J. Chem. Phys.* **2005**, *123*, 024101(1–7).
22. Johnson, E. R.; Becke, A. D. A post-Hartree-Fock model of intermolecular interactions: Inclusion of higher-order corrections. *J. Chem. Phys.* **2006**, *124*, 174104(1–9).
23. de Moraes, I. R.; Scholz, S.; Lüssem, B.; Leo, K. Analysis of chemical degradation mechanism within sky blue phosphorescent organic light emitting diodes by laser-desorption/ionization time-of-flight mass spectrometry. *Org. Electron.* **2011**, *12*, 341–347.
